1 **Adenosine signaling and its downstream target *mod(mdg4)* modify the pathogenic**  
2 **effects of polyglutamine in a *Drosophila* model of Huntington's disease**

3

4 Yu-Hsien Lin<sup>1,2\*</sup>, Houda Ouns Maaroufi<sup>1,2</sup>, Lucie Kucerova<sup>1</sup>, Lenka Rouhova<sup>1,2</sup>, Tomas  
5 Filip<sup>1,2</sup>, Michal Zurovec<sup>1,2\*</sup>

6 <sup>1</sup>Biology Centre of the Czech Academy of Sciences, Institute of Entomology, Ceske  
7 Budejovice, Czech Republic, <sup>2</sup>Faculty of Science, University of South Bohemia, Ceske  
8 Budejovice, Czech Republic

9

10 \*Correspondence and requests for materials should be addressed to Y.H.L. (email:  
11 r99632012@gmail.com) and M.Z. (email: zurovec@entu.cas.cz).

12

13 **Abstract**

14 Dysregulation of adenosine (Ado) homeostasis has been observed in both rodent models  
15 and human patients of Huntington's disease (HD). However, the underlying mechanisms  
16 of Ado signaling in HD pathogenesis are still unclear. In the present study, we used a  
17 *Drosophila* HD model to examine the concentration of extracellular Ado (e-Ado) as well  
18 as the transcription of genes involved in Ado homeostasis and found similar alterations.  
19 Through candidate RNAi screening, we demonstrated that silencing the expression of  
20 adenosine receptor (*adoR*) and equilibrative nucleoside transporter 2 (*ent2*) not only  
21 significantly increases the survival of HD flies but also suppresses both retinal pigment cell  
22 degeneration and the formation of mutant Huntingtin (mHTT) aggregates in the brain. We  
23 compared the transcription profiles of *adoR* and *ent2* mutants by microarray analysis and  
24 identified a downstream target of AdoR signaling, *mod(mdg4)*, which mediates the effects  
25 of AdoR on HD pathology in *Drosophila*. Our findings have important implications for the  
26 crosstalk between Ado signaling and the pathogenic effects of HD, as well as other human  
27 diseases associated with polyglutamine aggregation.

28

29

30

## 31 **Introduction**

32 Adenosine (Ado) is one of the most common neuromodulators in the nervous  
33 system of vertebrates as well as invertebrates and modulates synaptic transmission(Cunha,  
34 2001; Dunwiddie & Masino, 2001). Under normal conditions, the extracellular Ado (e-  
35 Ado) concentration is in the nanomolar range, which is sufficient to modulate the  
36 appropriate adenosine receptors (AdoRs) in the brain cells tonically(Fredholm, 2007).  
37 However, under pathological circumstances the e-Ado level may increase up to 100-fold.  
38 In these conditions, Ado functions as an imperfect neuroprotector; in some cases it may be  
39 beneficial and in others may worsen tissue damage(Picano & Abbracchio, 2000). Recent  
40 experiments with knockout mice for all four *adoRs* demonstrated that Ado signaling is less  
41 involved in baseline physiology and likely more crucial for its roles as a signal of stress,  
42 damage, and/or danger(Xiao, Liu, Jacobson, GavriloVA, & Reitman, 2019). It has also been  
43 suggested that Ado signaling is mainly engaged when an allostatic response is  
44 needed(Cunha, 2019).

45 Due to its impact on important physiological functions in the brain, e-Ado signaling  
46 has attracted attention as a possible therapeutic agent in Huntington's disease (HD)(Lee &  
47 Chern, 2014), a dominant hereditary neurodegenerative disorder caused by a mutation in  
48 the Huntingtin gene (*htt*). Mutated HTT protein (mHTT) contains an expanded  
49 polyglutamine (polyQ) tract encoded by 40 to more than 150 repeats of CAG  
50 trinucleotide(Vonsattel & DiFiglia, 1998). Although mHTT is ubiquitously expressed in  
51 the central nervous system (CNS) and peripheral cells in HD patients, it predominantly  
52 affects striatal neurons that contain a higher density of adenosine receptors A<sub>2A</sub> (A<sub>2A</sub>R)  
53 and A<sub>1</sub> (A<sub>1</sub>R)(D. Blum, R. Hourez, M.-C. Galas, P. Popoli, & S. N. Schiffmann, 2003).  
54 Several studies have demonstrated that the abnormality of AdoRs activity, especially A<sub>2A</sub>R  
55 in the striatum, contributes to HD pathogenesis(David Blum et al., 2018; Gomes, Kaster,  
56 Tome, Agostinho, & Cunha, 2011). In addition, the alteration of adenosine tone and the  
57 upregulation of striatal equilibrative nucleoside transporters (ENTs), facilitating Ado  
58 transport across the cytoplasmic membrane, suggest that e-Ado concentration could serve  
59 as a HD biomarker for assessing the initial stages of neurodegeneration(Guitart et al., 2016;  
60 Kao et al., 2017a). However, the complexity of the system modulating Ado metabolism

61 and the crosstalk between individual AdoRs, as well as their interactions with purinergic  
62 (P2) or dopamine receptors, impedes the characterization of HD pathophysiology and  
63 downstream mechanisms of e-Ado signaling (Anderson & Nedergaard, 2006; Tyebji et al.,  
64 2015).

65 *Drosophila* expressing human mHTT has previously been demonstrated as a  
66 suitable model system for studying gene interactions in polyQ pathology, and has been  
67 used to elicit a number of modifiers for symptoms of HD (Lewis & Smith, 2016; Steffan  
68 et al., 2001). *Drosophila* e-Ado signaling is a relatively simple system compared to  
69 mammals; it contains a single AdoR isoform (cAMP stimulation) and lacks P2X receptors  
70 (Fountain, 2013; Kucerova et al., 2012). Human homologs of the *Drosophila* genes  
71 involved in the regulation of Ado homeostasis and AdoR are shown in Fig. S1. The lack  
72 of adenosine deaminase 1 (ADA1) in *Drosophila* indicates that adenosine deaminase-  
73 related growth factors (ADGFs, related to ADA2), together with adenosine kinase  
74 (AdenoK), are the major metabolic enzymes converting extra- and intra-cellular adenosine  
75 to inosine and AMP, respectively (Maier, Galellis, & McDermid, 2005; Stenesen et al.,  
76 2013; Zurovec, Dolezal, Gazi, Pavlova, & Bryant, 2002). e-Ado signaling in *Drosophila*  
77 is involved in regulating various physiological and pathological processes, including  
78 modulation of synaptic plasticity, JNK-mediated stress response, hematopoiesis, and  
79 metabolic switching upon immune challenges (Bajgar et al., 2015; Knight et al., 2010;  
80 Poernbacher & Vincent, 2018).

81 In the present study, we performed a candidate RNAi screen examining the role of  
82 Ado signaling in a *Drosophila* HD model. We co-expressed exon 1 with a polyglutamine  
83 tract of normal human *htt* Q20 or pathogenic *mhtt* Q93 (Steffan et al., 2001) together with  
84 *UAS-RNAi* or *UAS*-overexpression constructs specific for *adoR*, Ado transporters, and Ado  
85 metabolic enzymes in *Drosophila*. We demonstrated that the downregulation of *adoR* and  
86 *ent2* expression reduces cell death, mortality and the formation of mHTT aggregates. In  
87 addition, we identified a number of differentially-expressed genes in response to Ado  
88 signaling and showed that *mod(mdg4)* is a downstream target of AdoR that mediates its  
89 effect in HD pathogenesis.

90

## 91 **Results**

### 92 **Phenotypes of *Drosophila* expressing mHTT**

93 To verify the effect of mHTT expression on *D. melanogaster*, we used a *UAS/GAL4* system  
94 for targeted gene expression. Flies overexpressing normal exon 1 from human huntingtin  
95 (Q20 HTT), or its mutant pathogenic form (Q93 mHTT), were driven by the pan-neuronal  
96 driver, *elav-GAL4*. The results showed that expression of mHTT under the *elav-GAL4*  
97 driver in the *Drosophila* brain is not lethal during the larval stage (Fig. S2A) but reduces  
98 both the adult eclosion rate (Fig. S2B) and adult lifespan (Fig. S2C). These results are  
99 consistent with previous observations (Song et al., 2013).

### 100 **Disturbance of extracellular adenosine (e-Ado) homeostasis in HD larvae**

101 A recent study of human HD patients reported a reduced concentration of e-Ado in the  
102 cerebrospinal fluid (Kao et al., 2017b). To determine whether e-Ado levels are also altered  
103 in HD *Drosophila*, we compared e-Ado levels in the hemolymph of last-instar larvae  
104 ubiquitously expressing Q20 HTT and Q93 mHTT driven by the *daughterless-Gal4* driver  
105 (*da-GAL4*). The results showed that the e-Ado concentration in the hemolymph of Q93-  
106 expressing larvae was significantly lower compared to larvae expressing Q20 or control  
107 *da-GAL4* (Fig. 1A).

108 Since e-Ado concentration may be associated with the level of extracellular ATP (e-ATP),  
109 we also examined its titer in the hemolymph of larvae with the same genotypes as the above  
110 experiment. As shown in Fig. 1B, there was no significant difference in e-ATP levels  
111 between Q20, Q93, and control *da-GAL4* larvae. We thus postulated that the lower level  
112 of e-Ado in Q93 larvae might be affected by changes in proteins involved in Ado  
113 metabolism or transportation.

### 114 **Altered transcriptions of genes involved in Ado homeostasis in HD *Drosophila***

115 Earlier reports have shown that the expression of several genes involved in Ado  
116 homeostasis, including Ado receptor, transporters, and genes involved in Ado metabolism,  
117 are abnormal in human HD patients as well as in HD mice (Glass, Dragunow, & Faull,  
118 2000; Martinez-Mir, Probst, & Palacios, 1991; Mievis, Blum, & Ledent, 2011). Since

119 homologous proteins have also been shown to control Ado homeostasis in flies (Fig. S1),  
120 we compared the expression of three *Drosophila adgf* genes (*adgf-a*, *adgf-c*, *adgf-d*),  
121 adenosine kinase (*adenoK*), adenosine transporters (*ent1*, *ent2*, *ent3*, *cnt2*), and adenosine  
122 receptor (*adoR*) in the brains of Q93- and Q20-expressing larvae. The results showed that  
123 the expression of *adgf-a* and *adgf-d*, as well as transporters *ent1*, *ent2*, and *ent3* in the brain  
124 of Q93 larvae were significantly lower than in Q20 larvae (Fig. 1D). The expression of  
125 *cnt2* and *adoR* showed no difference between Q93 and Q20 larvae.

126 In order to assess progressive changes in transcription profiles associated with HD  
127 pathogenesis, we further examined the expression of genes involved in Ado homeostasis  
128 in the heads of 5- and 15-day-old adults, roughly corresponding to early- and late-stage HD  
129 (Fig. S2C). Unlike in the larval stage, the expression of metabolic genes *adgf-c*, *adgf-d*,  
130 and *adenoK*, and transporter *ent1*, in five-day-old adults was found to be higher in Q93  
131 flies than Q20 flies (Fig. 1E). In addition, 15-day-old Q93 flies showed higher expression  
132 of *adgf-d* and *adenoK* (Fig. 1F). Previous studies in *Drosophila* have shown that the  
133 downregulation of the transporter *ents* decreases e-Ado concentration (Bajgar et al., 2015;  
134 Poernbacher & Vincent, 2018); hence, the reduced expression of three *ent* genes could  
135 explain why the e-Ado level is lower in Q93 larvae. Moreover, it has also been shown that  
136 the expression of *adgfs* as well as *adenoK* follows the levels of e-Ado upon stress  
137 conditions (Bajgar & Dolezal, 2018; Zuberova, Fenckova, Simek, Janeckova, & Dolezal,  
138 2010), suggesting that the lower expression of *adgfs* in Q93 larvae and the higher  
139 expression in Q93 adults might be a consequence of elevated e-Ado concentrations  
140 resulting from HD pathogenesis.

#### 141 **Functional characterization of Ado homeostasis and signaling in HD flies**

142 To understand the effects of alterations in Ado homeostasis on polyQ pathology, we used  
143 the pan-neuronal driver, *elav-GAL4*, for RNAi-mediated silencing of the genes involved in  
144 Ado transport, metabolism, and *adoR* in Q93-expressing flies and assessed their survival  
145 and formation of mHTT aggregates. In addition, we also co-expressed Q93 with RNAi  
146 transgenes in the eyes by using the *gmr-GAL4* (Kuo, Ren, Lao, Edgar, & Wang, 2013;  
147 Mugat, Parmentier, Bonneaud, Chan, & Maschat, 2008) driver and compared levels of  
148 retinal pigment cell degeneration.

149 Silencing the transcriptions of Ado metabolic enzymes showed that only the RNAi of *adgf-*  
150 *D* increased the number of eclosion rate (Fig. 2A). Silencing *adgf-A* and *adenoK*, but not  
151 *adgf-D* or *adgf-C* RNAi, extended the adult lifespan of Q93-expressing flies (Fig. 2B). To  
152 ensure that the mortality of the HD flies was mainly caused by Q93 expression and not by  
153 RNAi constructs, we recorded the survival of flies co-expressing normal *htt* Q20 together  
154 with RNAi transgenes until all corresponding experimental flies (expressing Q93 together  
155 with RNAi constructs) died (Fig. S3A). However, silencing *adgfs* or *adenoK* only affected  
156 survival and did not significantly influence mHTT aggregation (Fig. 2C&D) or retinal  
157 pigment cell degeneration (Fig. 2E).

158 Next, we examined the RNAi silencing of *adoR* and Ado transporters in Q93 and  
159 control Q20 flies. The results showed that knocking down the expression of *adoR* as well  
160 as two transporters, *ent1* and *ent2*, significantly increased the eclosion rate (Fig. 3A) and  
161 adult lifespan (Fig. 3B). The RNAi silencing of *ent2* and *adoR* extended the lifespan of HD  
162 flies to 30 and 40 days, respectively, which is about 1.5~2 times longer than that of HD  
163 flies. In contrast, knocking down *cnt2* expression did not change the viability of HD flies,  
164 and knocking down *ent3* did not influence the eclosion rate, although it increased mortality  
165 and shortened the lifespan of adult HD flies. The survival of control flies expressing Q20  
166 with individual RNAi constructs are shown in Fig. S3B. mHTT aggregation was  
167 significantly reduced (to 50%) in *adoR* RNAi flies (Fig. 3C&D), and a similar suppression  
168 of mHTT aggregate formation was also observed in 20-day-old HD flies (Fig. S4). An  
169 examination of eye phenotypes in *ent2* RNAi flies showed a significant reduction in retinal  
170 pigment cell death (Fig. 3E), but surprisingly we did not observe a significant rescue of  
171 cell death by silencing *adoR* (Fig S5). We therefore postulated that it might be due to  
172 insufficient RNAi efficiency for suppressing AdoR signaling in the eye. To test this, we  
173 combined Q93 flies with the *adoR* RNAi transgene under a *adoR* heterozygote mutant  
174 background (*AdoR*<sup>1/+</sup>) or with *AdoR*<sup>1</sup> homozygote mutant, and both showed significantly  
175 decreased retinal pigment cell degeneration similar to *ent2*-RNAi flies (Fig. 3E).

176 To further validate the RNAi results, we studied flies simultaneously expressing Q93 and  
177 overexpressing *ent2*, *adoR*, *adgf-A*, and *adenoK* in the brain and assessed the adult  
178 lifespans. Since silencing these genes extended the lifespan of HD flies (Figs. 2B&3B), we

179 expected the opposite effect upon overexpression. As shown in Fig. S6A, *ent2*  
180 overexpression significantly increased the mortality of early-stage HD flies; the survival  
181 of 5-day-old flies dropped to 60% for HD flies in contrast to 90% for Q93 control flies,  
182 and the lifespan of HD flies was significantly shorter than control flies expressing either  
183 Q93 alone or together with *gfp* RNAi. Consistently, we co-expressed strong and weak *adoR*  
184 overexpressing transgenes with Q93 and both significantly increased the mortality and  
185 shortened the lifespan of Q93 flies. The effects of shortening the lifespan were more severe  
186 than with *ent2* overexpression. Nevertheless, the increase in mortality by *adgf-A* and  
187 *adenoK* overexpression was not as strong as that caused by *ent2* and *adoR* overexpression,  
188 although both still showed a significant difference to either Q93 control or Q93/*gfp* RNAi  
189 control by weighted log-rank test (Fig. S6B). Hence, we concluded that overexpressing the  
190 examined genes enhances the effect of mHTT, resulting in the increased mortality of HD  
191 flies. Our results demonstrate that the overexpression and silencing of *ent2* or *adoR* has a  
192 stronger influence over HD pathology than genes involved in Ado metabolism.

### 193 **Interactions of AdoR with ENT1 and ENT2**

194 In order to investigate whether there is a synergy between the effects of AdoR and  
195 ENTs, we co-expressed *adoR* RNAi constructs with *ent1* RNAi or *ent2* RNAi in Q93-  
196 expressing flies. As shown in Fig. 4A, the silencing of both *ent2* and *adoR* has the same  
197 effect as silencing only *adoR*, indicating that ENT2 and AdoR are in the same  
198 pathway. Interestingly, the double knockdown of *ent1* and *adoR* shows a sum of individual  
199 effects on lifespan which is longer than the knockdown of *adoR* alone. There seems to be  
200 a synergy between ENT1 and AdoR suggesting that ENT1 may have its own effect, which  
201 is partially independent from AdoR signaling.

202 Next, we investigated our hypothesis that the source of e-Ado, which contributes  
203 to AdoR activation in Q93 flies, is mainly intracellular and released out of the cells by  
204 ENTs. We conducted an epistasis analysis by combining mHTT with *adoR* overexpression  
205 and *ent1* or *ent2* RNAi. The results showed that *adoR* overexpression increased the  
206 mortality of Q93 flies while the combination of *adoR* overexpression with either *ent1* or  
207 *ent2* RNAi minimized the increased mortality caused by *adoR* overexpression (Fig. 4B).  
208 Notably, Q93 flies expressing *ent2* RNAi and overexpressing *adoR* had the longest lifespan

209 in comparison to Q93 control or *ent1* RNAi flies. These results suggest that AdoR signaling  
210 needs functional Ado transportation to carry out its effect and thus the Ado efflux from  
211 these cells is needed for AdoR activity (Fig. 4C&D). The source of e-Ado, which  
212 contributes to AdoR activation causing HD pathogenesis, seems to be intracellular and it  
213 is mainly released out of the cells through ENT2.

#### 214 **AMPK is not involved in *Drosophila* HD pathogenesis**

215 AMP-activated protein kinase (AMPK) is one of the key enzymes maintaining energy  
216 balance within a cell by adjusting anabolic and catabolic pathways (Aymerich, Fougelle,  
217 Ferre, Casado, & Pastor-Anglada, 2006); both Ado receptors and transporters have been  
218 implicated in its activation (Dolinar, Jan, Pavlin, Chibalin, & Pirkmajer, 2018; Liu et al.,  
219 2018; Medina-Pulido et al., 2013; Ruan et al., 2018). Activation of AMPK is beneficial at  
220 early stages in mammalian HD models (Vazquez-Manrique et al., 2016); however, in the  
221 late stage of the disease it may worsen neuropathological and behavioral phenotypes (Ju et  
222 al., 2011).

223 To find out whether the above-described effects of e-Ado signaling and transport on HD  
224 flies are mediated by AMPK (Fig. 4C&D), we co-expressed *Q93 mHTT* with three different  
225 recombinant forms of AMPK  $\alpha$  subunit (Johnson et al., 2010; Swick, Kazgan, Onyenwoke,  
226 & Brenman, 2013), including wild-type AMPK $\alpha$  [M], a phosphomimetic-activated form  
227 of AMPK $\alpha$  [T184D], and dominant negative AMPK [DN], and assessed the survival of  
228 HD flies. The results showed that neither the activation nor the inhibition of AMPK  
229 signaling influenced the eclosion rate (Fig. 4E) or lifespan (Fig. 4F).

230 To further confirm the genetic data related to AMPK activation or inhibition, we  
231 pharmaceutically inhibited AMPK signaling by feeding the larvae with AMPK inhibitor,  
232 dorsomorphin (Compound C) (Braco, Gillespie, Alberto, Brenman, & Johnson, 2012). The  
233 results showed that although dorsomorphin had an effect on the development of larvae  
234 expressing normal Q20 HTT, it did not influence the eclosion of Q93-expressing larvae  
235 (Fig. 4G). Overall, our results show that, unlike in mammalian HD models, AMPK  
236 signaling does not play a significant role in the pathological manifestations of mHTT in  
237 *Drosophila*.



238 **Identification of potential downstream targets of the AdoR/ENT2 pathway by**  
239 **microarray analysis**

240 Our above results indicate that ENT2 and AdoR contribute to mHTT pathogenesis in HD  
241 *Drosophila* and work in the same pathway. To identify their downstream target genes, we  
242 compared the expression profiles of larvae carrying mutations in *adoR* or *ent2* as well as  
243 adult *adoR* mutants using microarrays (Affymetrix), shown as a Venn diagram in Fig. 5A  
244 and B. The intersection between each mutant contains differentially expressed transcripts  
245 in all three data sets, including six upregulated (Fig. 6A) and seven downregulated mRNAs  
246 (Fig. 5B). Interestingly, according to Flybase (<http://flybase.org>), four of these genes were  
247 expressed in the nervous system (*ptp99A* was upregulated, while *CG6184*, *cindr*, and  
248 *mod(mdg4)* were downregulated) (Fig. 5C).

249 To validate the microarray data, we knocked down *adoR* expression in the brain and  
250 examined the transcription of the four candidate genes expressed in the nervous system by  
251 qPCR. The results revealed that *ptp99A* and *mod(mdg4)* had the same expression trends as  
252 observed in the microarrays (Fig. 5D). We further examined whether the expression of  
253 *ptp99A* and *mod(mdg4)* are influenced by an increase of e-Ado level. As shown in Fig. 6E,  
254 Ado microinjection significantly increased *mod(mdg4)* expression and decreased *ptp99A*  
255 expression, confirming that *mod(mdg4)* is positively regulated and *ptp99A* is negatively  
256 regulated by the AdoR/ENT2 pathway.

257 **Suppression of *mod(mdg4)* decreased mHTT aggregation and increased survival of**  
258 **HD flies**

259 In order to examine the potential roles of *ptp99A*, *CG6184*, *cindr*, and *mod(mdg4)* genes in  
260 HD pathogenesis, we used RNAi to silence them in HD flies. The results showed that only  
261 the RNAi silencing of *mod(mdg4)* extended their lifespan. As shown in Figure 6A, the  
262 survival curve of HD flies with a silenced *mod(mdg4)* gene was almost identical to the  
263 curve specific for *adoR* RNAi HD flies; this effect was stronger than in *ent2* RNAi HD  
264 flies. In addition, *mod(mdg4)* RNAi significantly decreased the formation of mHTT  
265 inclusions (Fig. 6B&C) and suppressed retinal pigment cell degeneration (Fig. 7D). In  
266 contrast to *mod(mdg4)*, RNAi silencing of the other three genes did not show any  
267 significant effect.

268 To further confirm that *mod(mdg4)* is downstream target of the AdoR pathway and  
269 regulated by e-Ado signaling, we first checked the expression of *mod(mdg4)* in larval  
270 brains and adult heads of HD flies using qPCR. In Q93 larvae, we found that both the  
271 expression level of *mod(mdg4)* (Fig. 7A) and the e-Ado level was lower than in Q20-  
272 expressing controls (Fig. 1A). For the 15-day-old (roughly corresponding to late-stage HD)  
273 Q93 adults, there was no difference in *mod(mdg4)* expression compared to Q20 control  
274 adults (Fig. 7A). We next examined the epistasis relationship between *ent2*, *adoR*, and  
275 *mod(mdg4)* by combining overexpression of *ent2* or *adoR* *mod(mdg4)* RNAi in Q93-  
276 expressing flies. The results showed that *mod(mdg4)* RNAi suppressed the lethal effects  
277 caused by the overexpression of *ent2* and *adoR* (Fig. 8B). These results indicate that  
278 *mod(mdg4)* serves as a downstream target of AdoR signaling involved in the process of  
279 mHTT inclusion formation and other pathogenic effects (Fig. 7C).

280 The *mod(mdg4)* locus of *Drosophila* contains several transcription units encoded on both  
281 DNA strands producing 31 splicing isoforms (Yu, Waldholm, Bohm, & Visa, 2014). As  
282 shown in Fig. 5B, two of the *mod(mdg4)*-specific microarray probes which target 11  
283 *mod(mdg4)* splicing isoforms (Tab. S2) were downregulated in all three datasets. We  
284 performed splice form-specific qPCR analysis and found that *adoR* RNAi silencing leads  
285 to the downregulation of multiple *mod(mdg4)* isoforms (Fig. 7D), suggesting that AdoR  
286 signaling regulates multiple isoforms.

287

## 288 Discussion

289 Considerable dysregulation of Ado homeostasis has been observed in HD human  
290 patients and mice, but the mechanisms of such changes related to HD pathogenesis still  
291 need to be characterized (D. Blum et al., 2018). The present study examined the e-Ado titer  
292 in the hemolymph of HD *Drosophila* larvae and found that it is lower in Q93-expressing  
293 larvae (Fig. 1). Although we did not measure the e-Ado titer in adult flies (due to a problem  
294 in acquiring a sufficient amount of hemolymph), the dynamic changes in expression levels  
295 of genes involved in Ado homeostasis (Fig. 1D-E), as well as the AdoR-regulated gene,  
296 *mod(mdg4)* (Fig. 8A), indicated that e-Ado titer and AdoR activity are variable in different  
297 stages of HD. Such dynamic changes of e-Ado homeostasis have also been observed in

298 rodent HD models, whereby striatal adenosine tone is lower during the early stage of the  
299 disease and increased during the later stages(Gianfriddo, Melani, Turchi, Giovannini, &  
300 Pedata, 2004; Guitart et al., 2016).

301 Both the activation and inhibition of A<sub>2A</sub>R by pharmacological treatments have  
302 shown benefits in mammalian HD models. In R6/2 mice, the beneficial effect of activating  
303 A<sub>2A</sub>R is thought to occur *via* the inhibition of AMPK nuclear translocation (which  
304 contributes to HD pathogenesis including brain atrophy, neuron death, and increased  
305 mHTT aggregates formation) (Ju et al., 2011). Beneficial effects by antagonizing A<sub>2A</sub>R  
306 with SCH58261 in R6/2 mice include reduced striatal glutamate and adenosine outflow as  
307 well as restoring emotional behavior and susceptibility to NMDA toxicity (Domenici et al.,  
308 2007; Gianfriddo et al., 2004). A<sub>1</sub>R activation has also been shown to have neuroprotective  
309 effects; however, the chronic administration of A<sub>1</sub>R agonists (leading to a desensitisation  
310 of A1 receptors) increases neuronal loss whereas the chronic administration of A<sub>1</sub>R  
311 antagonists (inducing an upregulation of A1 receptors) improves survival and neuronal  
312 preservation in the same model (D. Blum, R. Hourez, M. C. Galas, P. Popoli, & S. N.  
313 Schiffmann, 2003). Our results show that the genetic depletion of AdoR has beneficial  
314 effects on HD flies, while the activation of AdoR contributes to mHTT pathogenesis and  
315 aggregates formation.

316 We observed a non-additive interaction between AdoR and ENT2 characteristic for  
317 epistasis relationship (Fig. 4B), indicating that ENT2 is required for the transportation of  
318 Ado from the intra- to extracellular environment which activates AdoR and, in turn,  
319 enhances the effects of mHTT. Our previous report showed that both ENT2 and AdoR  
320 participate in modulating synaptic transmission, and that both *adoR* and *ent2* mutations  
321 cause defects in associative learning in *Drosophila*(Knight et al., 2010). Consistently, both  
322 the inhibition of Ado release by the knockdown of *ent2* in hemocytes and the mutation of  
323 *adoR* suppress metabolic reprogramming and hemocyte differentiation upon immune  
324 challenges(Bajgar et al., 2015). Furthermore, another report showed that the disruption of  
325 epithelial integrity by Scribbled (*Scrib*) RNAi stimulates Ado release through ENT2,  
326 subsequently activating AdoR that, in turn, upregulates tumor necrosis factor (TNF)  
327 production which activates JNK signaling(Poernbacher & Vincent, 2018). Interestingly,

328 while the effects of *ent2* and *adoR* RNAi in HD flies were found to completely overlap,  
329 *ent1* RNAi showed a synergistic effect, suggesting potential AdoR-independent  
330 mechanisms (Fig. 4A). These results correspond to our previous report showing that  
331 *Drosophila* ENT1 has lower specificity for Ado transportation in comparison to  
332 ENT2(Fleischmannova et al., 2012). The altered expression of *ent1*, as well as the RNAi  
333 effect in HD flies, might be associated with the disturbance of nucleotide homeostasis,  
334 similar to that observed in R6/2 and Hdh<sup>Q150</sup> mice(Toczek et al., 2016).

335 We identified a downstream target of the AdoR pathway, *mod(mdg4)*, which  
336 contributes to the effects of mHTT in the *Drosophila* HD model. The *mod(mdg4)* gene has  
337 previously been implicated in the regulation of position effect variegation, chromatin  
338 structure, and neurodevelopment(Dorn & Krauss, 2003). The altered expression of  
339 *mod(mdg4)* has also been observed in flies expressing untranslated RNA containing CAG  
340 and CUG repeats(Mutsuddi, Marshall, Benzow, Koob, & Rebay, 2004; van Eyk et al.,  
341 2011). In addition, *mod(mdg4)* has complex splicing, including *trans*-splicing, producing  
342 at least 31 isoforms(Krauss & Dorn, 2004). All isoforms contain a common N-terminal  
343 BTB/POZ domain which mediates the formation of homomeric, heteromeric, and  
344 oligomeric protein complexes(Albagli, Dhordain, Deweindt, Lecocq, & Leprince, 1995;  
345 Bardwell & Treisman, 1994; Espinas et al., 1999). Among these isoforms, only two  
346 [including *mod(mdg4)*-56.3 (isoform H) and *mod(mdg4)*-67.2 (isoform T)] have been  
347 functionally characterized. *Mod(mdg4)*-56.3 is required during meiosis for maintaining the  
348 chromosome pairing and segregation in males(Soltani-Bejnood et al., 2007; Thomas et al.,  
349 2005). *Mod(mdg4)*-67.2 interacts with Suppressor of hairy wing [Su(Hw)] and  
350 Centrosomal protein 190 kD (CP190) forming a chromatin insulator complex which  
351 inhibits the action of the enhancer on the promoter, and is important for early embryo  
352 development and oogenesis(Buchner et al., 2000; Melnikova, Kostyuchenko, Parshikov,  
353 Georgiev, & Golovnin, 2018; Soshnev, Baxley, Manak, Tan, & Geyer, 2013). Although  
354 our results showed that silencing all *mod(mdg4)* isoforms decreases the effects of mHTT  
355 (Fig. 6), we could not clarify which of the isoforms is specifically involved in HD  
356 pathogenesis because AdoR signaling regulates multiple isoforms (Fig. 7D). Interestingly,  
357 an earlier report on protein two-hybrid screening indicated that *Mod(mdg4)* interacts with  
358 six Hsp70 family proteins(Giot et al., 2003; Oughtred et al., 2019), and Hsp70 proteins are

359 known for their contribution to the suppression of polyQ aggregates formation and  
360 neurodegeneration (Chan, Warrick, Gray-Board, Paulson, & Bonini, 2000; Warrick et al.,  
361 1999). Further study will be needed to identify the specific *mod(mdg4)* isoform involved  
362 in HD pathogenesis, and whether a decrease in mHTT aggregates by *mod(mdg4)* RNAi is  
363 connected to Hsp70 interaction.

364 In summary, we observed an alteration in the e-Ado concentration and expression of genes  
365 involved in Ado homeostasis in a *Drosophila* HD model. By candidate RNAi screening,  
366 we demonstrated that the silencing of *ent2* and *adoR* increases the survival of HD flies in  
367 addition to suppressing retinal cell degeneration and mHTT aggregate formation. We also  
368 showed that the activation of e-Ado signaling enhances the effects of mHTT. Furthermore,  
369 we found that *mod(mdg4)* is a downstream target of the AdoR pathway and plays a major  
370 role in the pathogenesis of HD flies. Our work enhances our understanding of e-Ado  
371 signaling in HD pathogenesis and may open up new opportunities for HD pharmacological  
372 intervention.

373

## 374 **Materials and methods**

### 375 **Fly stocks**

376 Flies were reared at 25 °C on standard cornmeal medium. The following RNAi lines were  
377 acquired from the TRiP collection (Transgenic RNAi project) at Harvard Medical School:  
378 *adgfA*-Ri (BL67233), *adgfC*-Ri (BL42915), *adgfD*-Ri (BL56980), *adenoK*-Ri (BL64491),  
379 *ent1*-Ri (BL51055), *adoR*-Ri (BL27536), *gfp*-Ri (BL41552), *mod(mdg4)*-Ri (BL32995),  
380 *cindr*-Ri (BL38976), and *ptp99A*-Ri (BL57299). The following RNAi lines were acquired  
381 from the Vienna *Drosophila* RNAi Center (VDRC): *ent2*-Ri (ID100464), *ent3*-Ri  
382 (ID47536), *cnt2*-Ri (ID37161), and *cg6184*-Ri (ID107150). The following lines were  
383 provided by the Bloomington *Drosophila* Stock Center: UAS-AMPK $\alpha^{T184D}$  (BL32110),  
384 UAS-AMPK $\alpha^M$  (BL32108), UAS-AMPK $\alpha^{DN}$  (AMPK $\alpha^{K57A}$ , BL32112), and *elav<sup>C155</sup>*-  
385 GAL4 (BL458).

386 Flies overexpressing human normal huntingtin (HTT) exon 1, Q20Httexon<sup>1111FIL</sup> or mutant  
387 pathogenic fragments (mHTT), Q93Httexon<sup>14F132</sup> were obtained from Prof. Lawrence

388 Marsh (UC Irvine, USA)(Steffan et al., 2001). The UAS-overexpression lines, Ox-adenoK  
389 and Ox-adoR (s), were obtained from Dr. Ingrid Poernbacher (The Francis Crick Institute,  
390 UK)(Poernbacher & Vincent, 2018). gmr-GAL4 was obtained from Dr. Marek Jindra  
391 (Biology Centre CAS, Czechia). da-GAL4 was obtained from Dr. Ulrich Theopold  
392 (Stockholm University). The UAS overexpression strains Ox-adgfA, Ox-ent2, and Ox-  
393 adoR (w), as well as adoR<sup>1</sup> and ent2<sup>3</sup> mutant flies, were generated in our previous  
394 studies(Dolezal, Dolezelova, Zurovec, & Bryant, 2005; Dolezal, Gazi, Zurovec, & Bryant,  
395 2003; Dolezelova, Nothacker, Civelli, Bryant, & Zurovec, 2007; Knight et al., 2010).

396

### 397 **Eclosion rate and adult lifespan assay**

398 For assessing the eclosion rate, male flies containing the desired RNAi or overexpression  
399 transgene (RiOx) in the second chromosome with genotype w<sup>1118</sup>/Y; RiOx /CyO; UAS-  
400 Q93/MKRS were crossed with females of *elav-GAL4*; +/+; +/+. The ratio of eclosed adults  
401 between *elav-GAL4*/+; RiOx/+; UAS-Q93/+ and *elav-GAL4*/+; RiOx/+; +/MKRS was then  
402 calculated. If the desired RiOx transgene was in the third chromosome, female flies  
403 containing *elav-GAL4*; +/+; RiOx were crossed with male w<sup>1118</sup>/Y; +/+; UAS-Q93/MKRS,  
404 and the ratio of eclosed adults between *elav-GAL4*; +/+; RiOx/UAS-Q93 and *elav-GAL4*;  
405 +/+; RiOx/MKRS was calculated.

406 For the adult lifespan assay, up to 30 newly emerged female adults were placed in each  
407 cornmeal vial and maintained at 25 °C. At least 200 flies of each genotype were tested, and  
408 the number of dead flies was counted every day. Flies co-expressing RiOx and Q20 were  
409 used for evaluating the effect of RNAi or overexpression of the desired transgenes (Fig.  
410 S3A&B).

411

### 412 **Extracellular adenosine and ATP level measurements**

413 To collect the hemolymph, six third instar larvae (96 hours post-oviposition) were torn in  
414 150 µl of 1× PBS containing thiourea (0.1 mg/ml) to prevent melanization. The samples  
415 were then centrifuged at 5000× g for 5 min to separate the hemocytes and the supernatant  
416 was collected for measuring the extracellular adenosine or ATP level. For measuring the  
417 adenosine titer, 10 µl of hemolymph was mixed with reagents of an adenosine assay kit

418 (Biovision) following the manufacturer's instructions. The fluorescent intensity was then  
419 quantified (Ex/Em = 533/ 587 nm) using a microplate reader (BioTek Synergy 4). For  
420 measuring the ATP level, 10  $\mu$ l of hemolymph was incubated with 50  $\mu$ l of CellTiter-Glo  
421 reagent (Promega) for 10 min. Then, the luminescent intensity was quantified using an  
422 Orion II microplate luminometer (Berthold). To calibrate the standard curve of ATP  
423 concentration, 25  $\mu$ M ATP standard solution (Epicentre) was used for preparing a  
424 concentration gradient (0, 2, 4, 6, 8, 10  $\mu$ M) of ATP solution and the luminescent intensity  
425 was measured for each concentration. The protein concentration of the hemolymph sample  
426 was determined by A280 absorbance using a NanoDrop 2000 spectrophotometer (Thermo  
427 Fisher). The adenosine and ATP concentrations were first normalized to protein  
428 concentration. Then, the values of Q20 and Q93 samples were normalized to values of the  
429 *GAL4* control sample. Six independent replicates for each genotype were performed for the  
430 analysis of adenosine and ATP levels.

#### 431 **RNA extraction**

432 The brains from 10 third-instar larvae (96 hours post-oviposition), heads from 30 female  
433 adults (5 days or 15 days old) or 15 whole female flies were collected. The samples were  
434 first homogenized in RiboZol (VWR) and the RNA phase was separated by chloroform.  
435 For brain or head samples, the RNA was precipitated by isopropanol, washed in 75%  
436 ethanol and dissolved in nuclease-free water. For whole fly samples, the RNA phase was  
437 purified using NucleoSpin RNA columns (Macherey-Nagel) following the manufacturer's  
438 instructions. All purified RNA samples were treated with DNase to prevent genomic DNA  
439 contamination. cDNA was synthesized from 2  $\mu$ g of total RNA using a RevertAid H Minus  
440 First Strand cDNA Synthesis Kit (Thermo Fisher Scientific).

441

#### 442 **Adenosine injection**

443 Three- to five-day-old female adults were injected with 50 nl of 10 mM adenosine using a  
444 NANOJECT II (Drummond Scientific); control flies were injected with 50 nl of 1 $\times$  PBS.  
445 Two hours post-injection, 15 injected flies for each replicate were collected for RNA  
446 extraction.

#### 447 **Microarray analysis**

448 The Affymetrix GeneChip® *Drosophila* genome 2.0 array system was used for microarray  
449 analysis following the standard protocol: 100 ng of RNA was amplified with a GeneChip  
450 3' express kit (Affymetrix), and 10 µg of labeled cRNA was hybridized to the chip  
451 according to the manufacturer's instructions. Statistical analysis of array data were  
452 described previously in our studies (Arefin et al., 2014; Kucerova et al., 2016). Storey's q  
453 value (false discovery rate, FDR) was used to select significantly differentially transcribed  
454 genes ( $q < 0.05$ ). Transcription raw data are shown in Table S2. The transcription data are  
455 deposited in the ArrayExpress database ([www.ebi.ac.uk/arrayexpress](http://www.ebi.ac.uk/arrayexpress); accession No. E-  
456 MTAB-8699 and E-MTAB-8704).

457

#### 458 **qPCR and primers**

459

460 5× HOT FIREPol® EvaGreen® qPCR Mix Plus with ROX (Solis Biodyne) and an Eco  
461 Real-Time PCR System (Illumina) were used for qPCR. Each reaction contained 4 µl of  
462 EvaGreen qPCR mix, 0.5 µl each of forward and reverse primers (10 µM), 5 µl of diluted  
463 cDNA and ddH<sub>2</sub>O to adjust the total volume to 20 µl. The list of primers is shown in Table  
464 S1. The expression level was calculated using the  $2^{-\Delta\Delta C_t}$  method. The ct values of target  
465 genes were normalized to reference gene, ribosomal protein 49 (*rp49*).

466

#### 467 **Imaging of retinal pigment cell degeneration**

468 Twenty- and thirty-day-old female adults were collected and their eye depigmentation  
469 phenotypes were recorded. At least 30 individuals for each genotype were examined under  
470 a microscope, and at least five representative individuals were chosen for imaging. Pictures  
471 were taken with an EOS 550D camera (Canon) mounted on a SteREO Discovery V8  
472 microscope (Zeiss).

#### 473 **Immunostaining**

474 Brains dissected from 10- or 20-day-old adult females were used for immunostaining. The  
475 brains were fixed in 4% PFA, permeabilized with PBST (0.1% Triton X-100), blocked in  
476 PAT (PBS, 0.1% Triton X-100, 1% BSA) and stained with antibodies in PBT (PBS, 0.3%  
477 Triton X-100, 0.1% BSA). Primary antibodies used in this study were mouse anti-HTT,



478 MW8 which specifically binds to mHTT aggregates (1:40, DSHB), and rat anti-Elav (1:40,  
479 DSHB) which is a pan-neuronal antibody. Secondary antibodies were Alexa Fluor 488  
480 anti-mouse and Alexa Fluor 647 anti-rat (1:200, Invitrogen). The samples were mounted  
481 in Fluoromount-G (Thermo Fisher) overnight, prior to image examination.

482

### 483 **Quantification of mHTT aggregates**

484 Images of aggregates were taken using a Flowview 100 confocal microscope (Olympus).  
485 The intensity of mHTT aggregates detected by anti-HTT antibody (MW8) or anti-Elav  
486 were quantified using ImageJ software. The level of mHTT aggregates was quantified by  
487 normalizing the mHTT aggregates intensity to Elav intensity. At least six brain images  
488 from each genotype were analyzed.

489

### 490 **AMPK inhibitor (dorsomorphin) feeding**

491 Thirty first instar of Q20- or Q93-expressing larvae were collected for each replicate 24  
492 hours after egg laying. Larvae were transferred to fresh vials with 0.5 g instant *Drosophila*  
493 medium (Formula 4–24, Carolina Biological Supply, Burlington, NC) supplemented with  
494 2 mL distilled water containing either dorsomorphin (100  $\mu$ M) or DMSO (1%). Total  
495 number of emerging adults were counted.

496

### 497 **Statistical analysis**

498 Error bars show standard error of the mean throughout this paper. Significance was  
499 established using Student's t-test (N.S., not significant; \*  $P < 0.05$ , \*\*  $P < 0.01$ , \*\*\*  $P <$   
500 0.001) or one-way ANOVA analysis with Tukey's HSD *post-hoc* test. For the statistical  
501 analysis of survival curves, we used the online tool OASIS 2 to perform a weighted log-  
502 rank test (Wilcoxon-Breslow-Gehan test) for determining significance (Han et al., 2016).

503

504

### 505 **Figures**

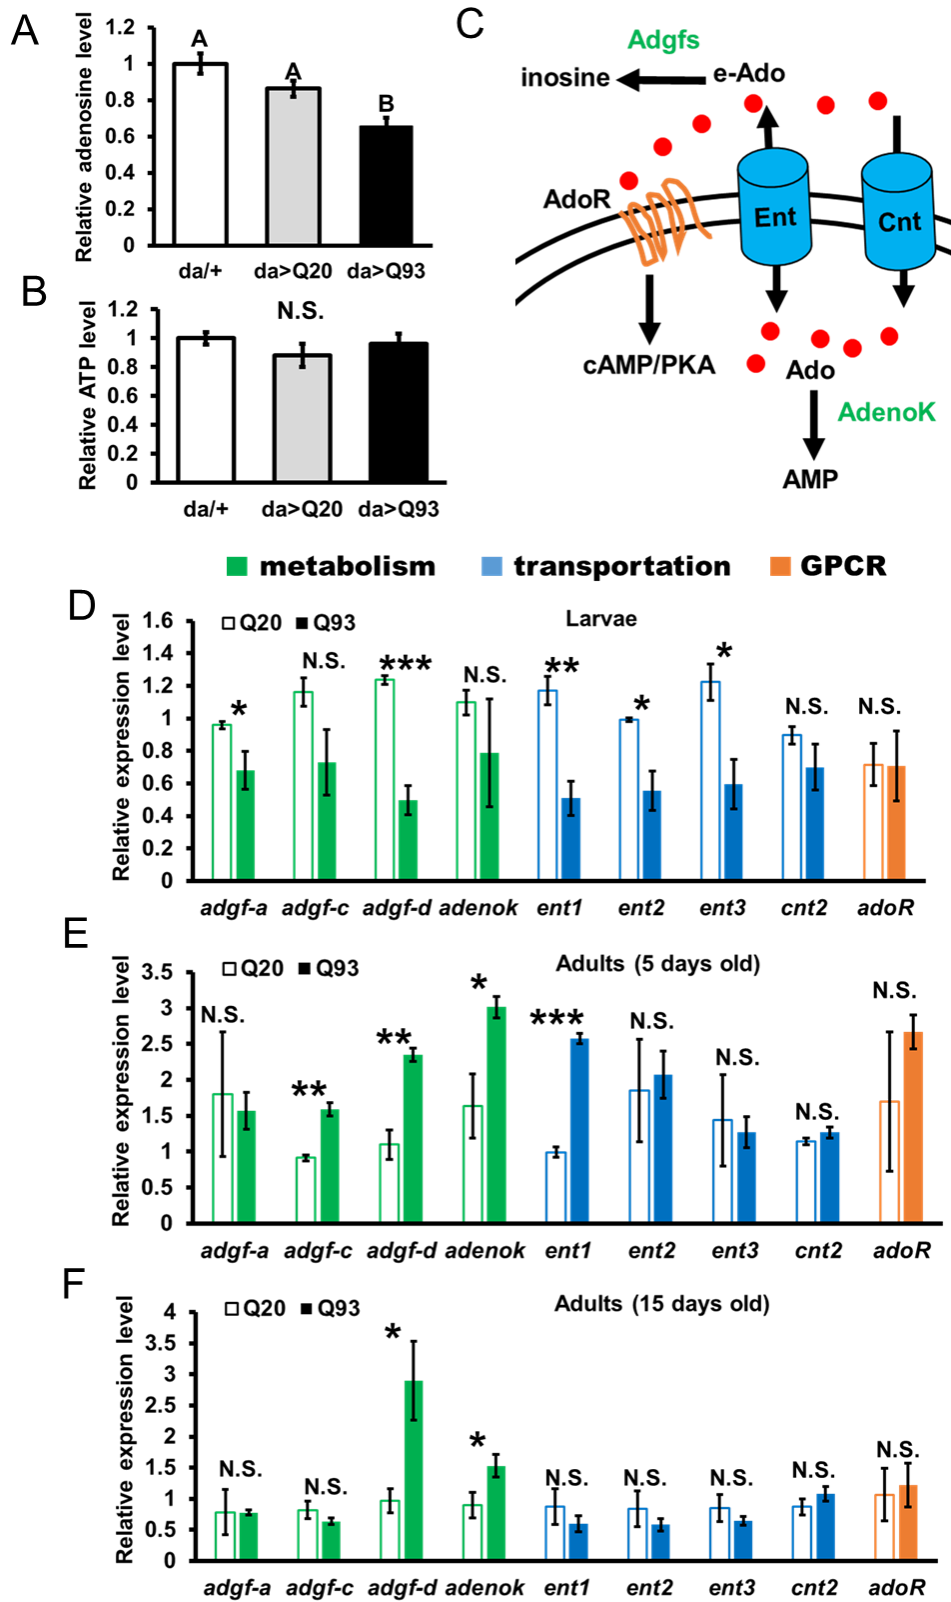

506

507 Figure 1. Alteration of adenosine homeostasis in the *Drosophila* HD model. (A-B) The  
508 measurements of extracellular adenosine levels (A) and extracellular ATP levels (B) in  
509 Q93-expressing (*da>Q93*), Q20-expressing (*da>Q20*) and control *da*-GAL4 (*da/+*) larvae.  
510 Six independent replicates were measured. Significance was analyzed by ANOVA with  
511 Tukey's HSD *post-hoc* test; significant differences ( $P < 0.05$ ) among treatment groups are  
512 marked with different letters. (C) Diagram showing the interaction of adenosine metabolic  
513 enzymes, transporters, and receptors in *Drosophila*. (D-F) Expression profiles of genes  
514 involved in adenosine metabolism (green) and adenosine transportation (blue) as well as  
515 adenosine receptors (orange) at different stages in HD *Drosophila* brains (larvae) or heads  
516 (adults). The expression of Q20 and Q93 were driven by the pan-neuronal driver (*elav*-  
517 GAL4). Three independent replicates were measured. The significances of results were  
518 examined using Student's t-test: \* $P < 0.05$ , \*\* $P < 0.01$ , \*\*\* $P < 0.001$ ; N.S., not significant.  
519 All data are presented as mean  $\pm$  SEM

520

521

522

523

524

525

526

527

528

529

530

531

532

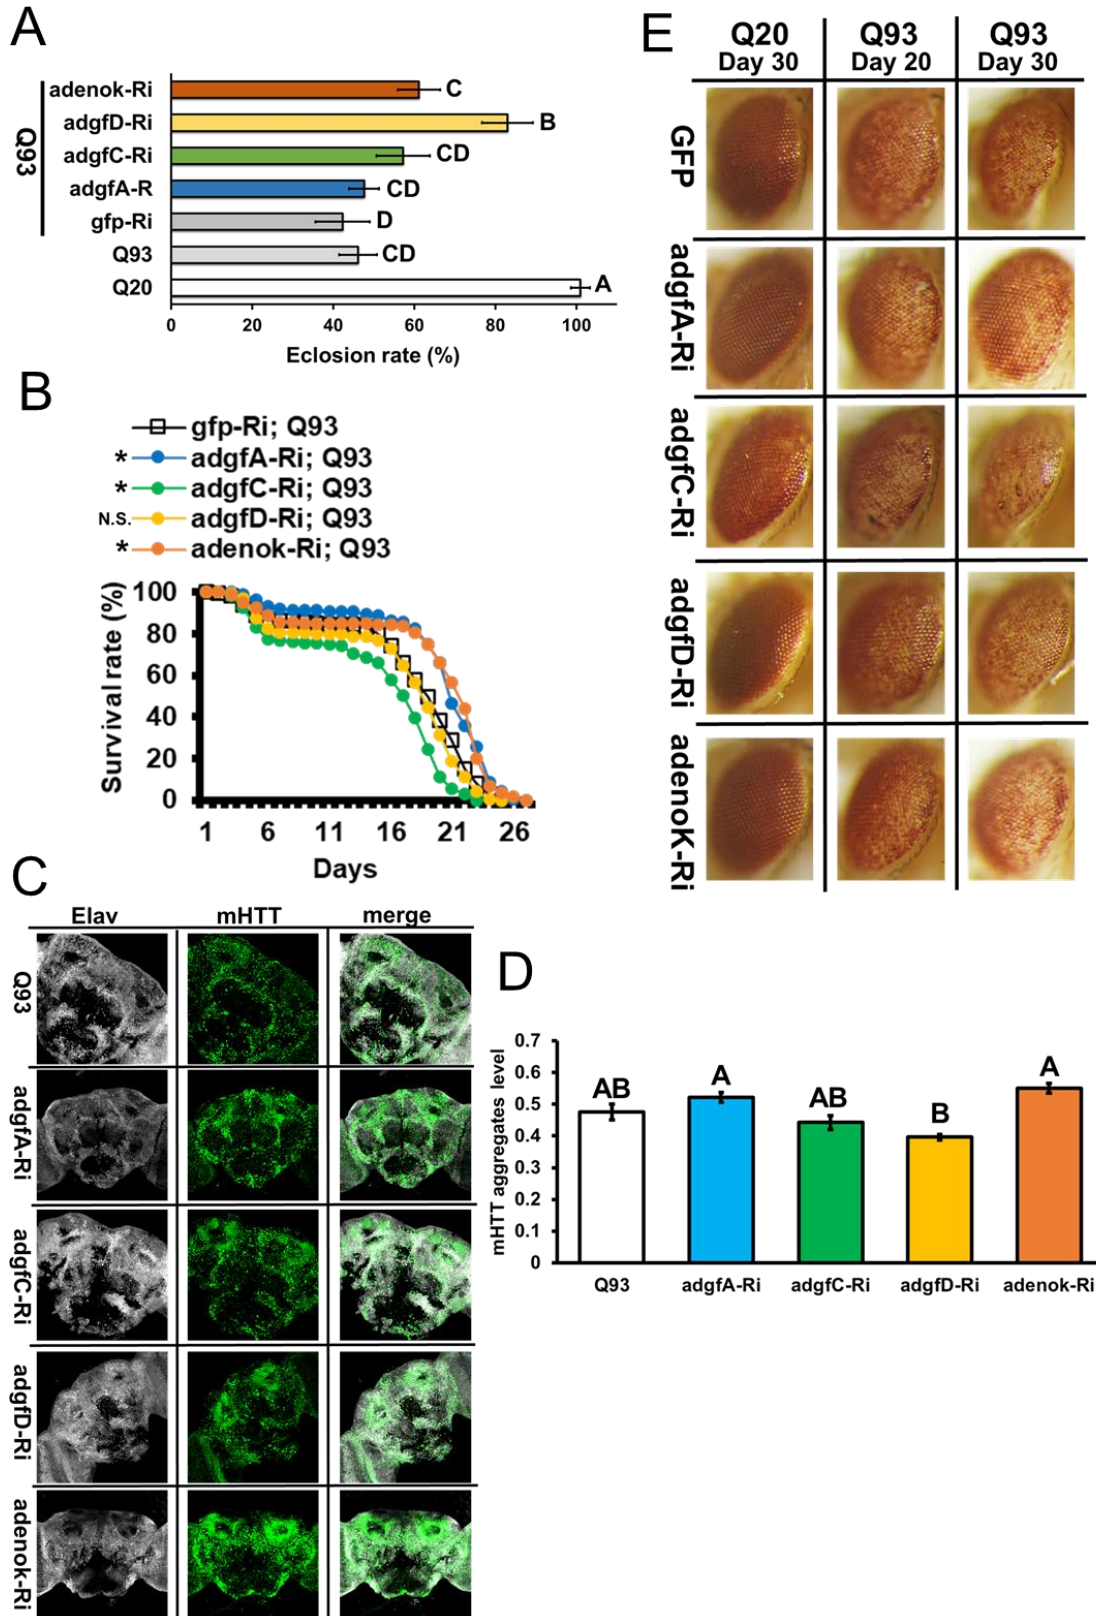

533

534

535 Figure 2. RNAi-mediated (Ri) downregulation of adenosine metabolic genes in HD  
536 *Drosophila*. Co-expression Q93 with each RNAi transgenes were driven by the pan-  
537 neuronal driver, *elav-GAL4* (A-D), or eye driver, *gmr-GAL4* (E). The adult eclosion rate  
538 (A), adult lifespan (B), mHTT aggregate levels (C-D), and retinal pigment cell  
539 degeneration (E) were compared. † Eye image of homozygous *adoR<sup>l</sup>* mutant without *htt*  
540 expression. At least five independent replicates were measured for eclosion rate. Detailed  
541 methodologies of the lifespan assay, eye imaging, and quantification of mHTT aggregates  
542 are described in Materials and methods. Significance values of the eclosion rate (A) and  
543 mHTT aggregates levels (D) were analyzed by ANOVA with Tukey's HSD *post-hoc* test;  
544 significant differences ( $P < 0.05$ ) among treatment groups are marked with different letters.  
545 Significance values for the adult lifespan curve (B) were analyzed by a weighted log-rank  
546 test, and significant differences between control gfp-Ri flies with each RNAi group are  
547 labeled as follows: \* $P < 0.05$ ; N.S., not significant. Error bars are presented as mean  $\pm$   
548 SEM

549

550

551

552

553

554

555

556

557

558

559

560

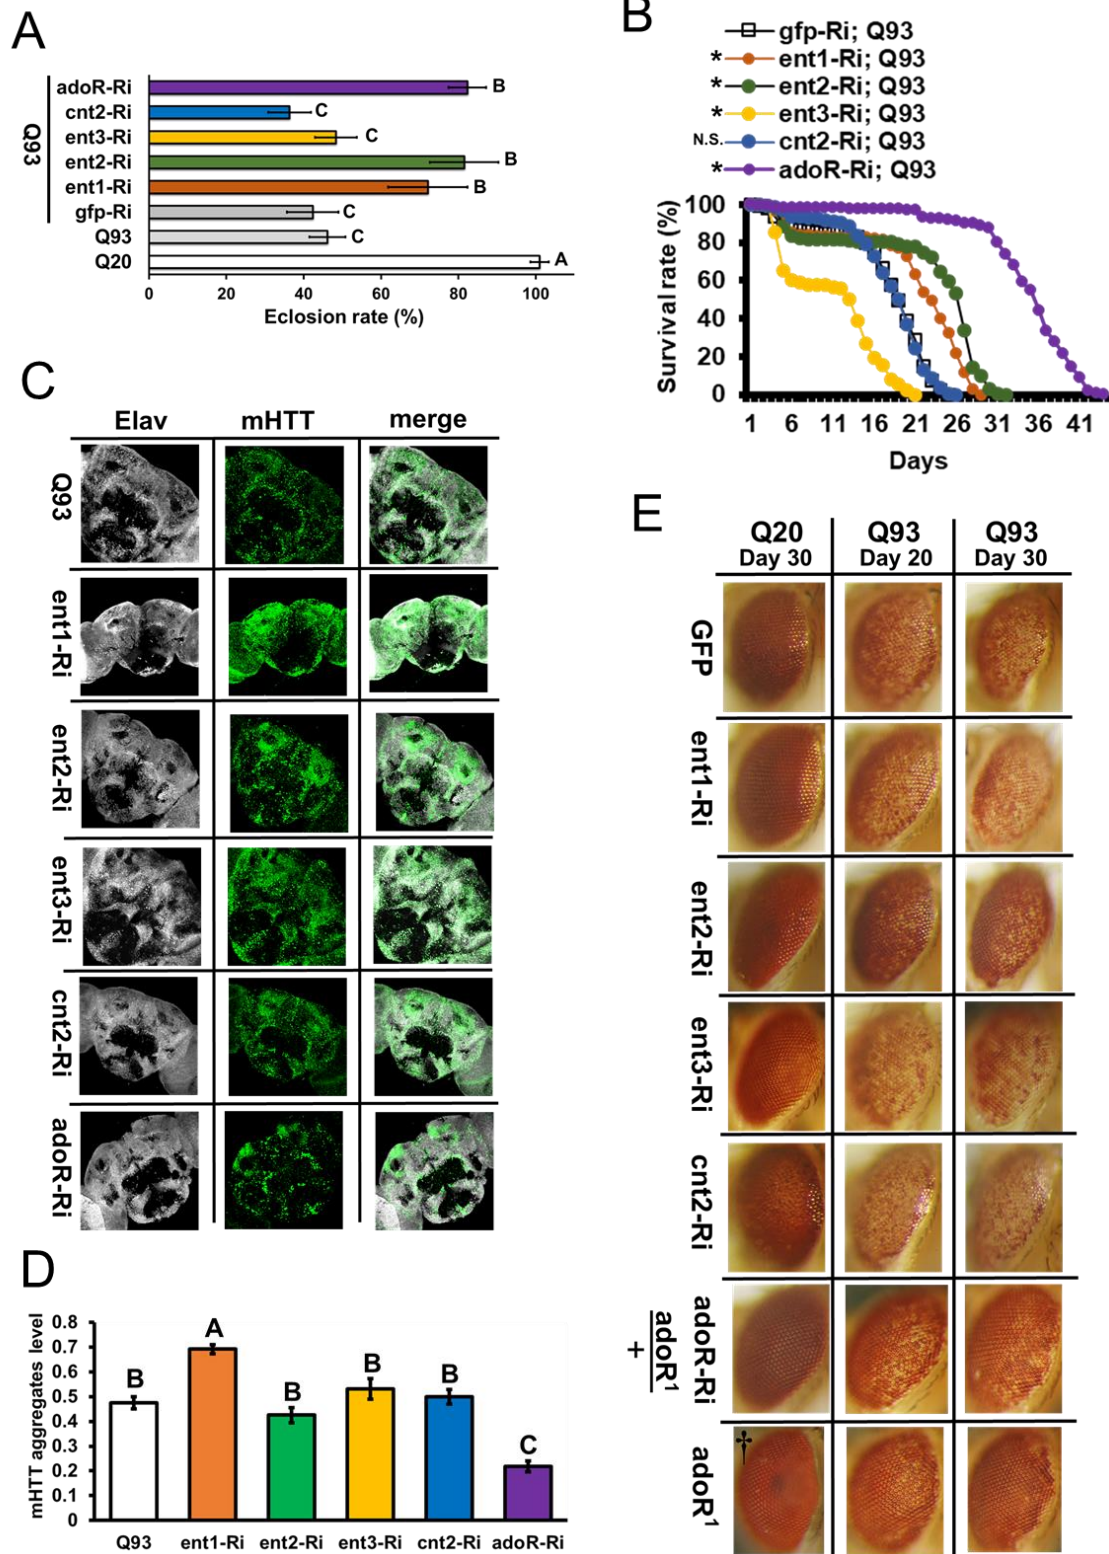

561

562

563 Figure 3. RNAi-mediated (Ri) downregulation of adenosine transporters and adenosine  
564 receptor (*adoR*) in HD *Drosophila*. Co-expression of Q93 with each RNAi transgene was  
565 driven by the pan-neuronal driver, *elav*-GAL4 (A-D), or eye driver, *gmr*-GAL4 (E). The  
566 adult eclosion rate (A), adult lifespan (B), mHTT aggregate levels (C-D), and retinal  
567 pigment cell degeneration (E) were compared. At least five independent replicates were  
568 measured for eclosion rate. Detailed methodologies of the lifespan assay, eye imaging, and  
569 quantification of mHTT aggregates are described in Materials and methods. Significance  
570 values for eclosion rate (A) and mHTT aggregates levels (D) were analyzed by ANOVA  
571 with Tukey's HSD *post-hoc* test; significant differences ( $P < 0.05$ ) among treatment groups  
572 are marked with different letters. Significance values for the adult lifespan curve (B) were  
573 analyzed by a weighted log-rank test; significant differences comparing control *gfp*-Ri with  
574 each RNAi group are labeled as follows: \* $P < 0.05$ ; N.S., not significant. Error bar are  
575 presented as mean  $\pm$  SEM

576

577

578

579

580

581

582

583

584

585

586

587

588

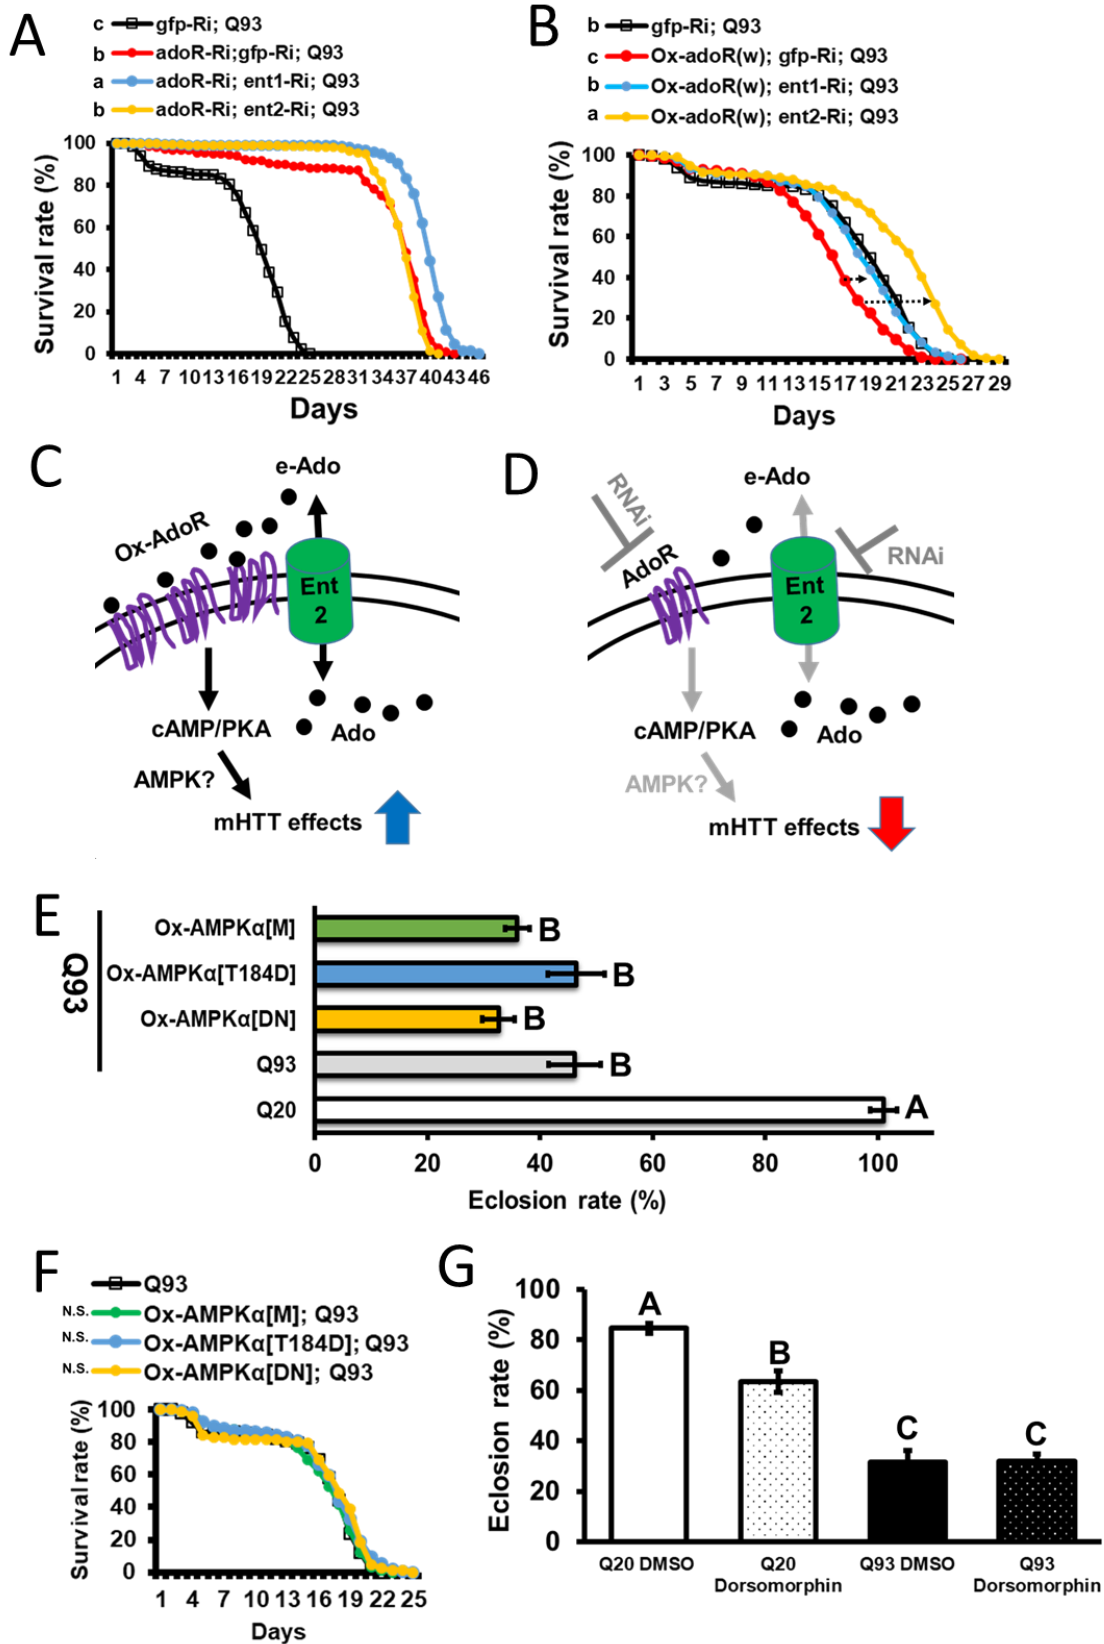



590 Figure 4. Interactions of AdoR and ENTs as well as the impacts of AMPK activity in HD  
591 *Drosophila*. (A) Co-expression of *adoR* RNAi with *ent1* or *ent2* RNAi in HD flies. (B) Co-  
592 expression of *adoR* overexpressing construct (Ox-*adoR*) with *ent1* or *ent2* RNAi transgenes  
593 in HD flies. (C-D) Diagrams showing the action of Ado in mHTT pathogenesis. Co-  
594 expression of Q93 with overexpression of wild-type AMPK $\alpha$  [M], phosphomimetic-  
595 activated form of AMPK $\alpha$  [T184D], and dominant negative AMPK [DN] were driven by  
596 the pan-neuronal driver (*elav-GAL4*); the adult eclosion rate (E) and survival curve (F)  
597 were compared. (G) Q20- and Q93-expressing larvae were fed with AMPK inhibitor,  
598 dorsomorphin, or control DMSO, and the adult eclosion rates were assessed. Significance  
599 values of the adult lifespan curve were analyzed by a weighted log-rank test; different  
600 letters indicate significant differences ( $P < 0.05$ ) among treatment groups. N.S., not  
601 significant. Significance values of (E) and (G) were analyzed by ANOVA with Tukey's  
602 HSD *post-hoc* test; significant differences ( $P < 0.05$ ) among treatment groups are marked  
603 with different letters.

604

605

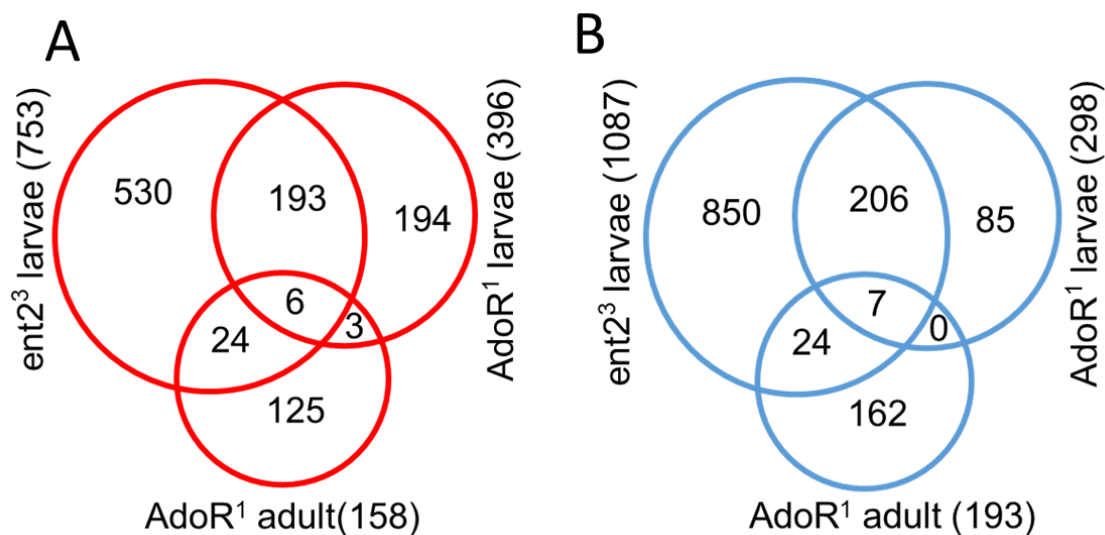

**C**

| Probe ID     | gene      | CG      | Log fold change      |                      |                      | Localization    |
|--------------|-----------|---------|----------------------|----------------------|----------------------|-----------------|
|              |           |         | Ent2 <sup>3</sup> -L | AdoR <sup>1</sup> -L | AdoR <sup>1</sup> -A |                 |
| 1641190_at   | Jon65Aii  | CG6580  | 2.79                 | 2.5                  | 3.18                 | MG              |
| 1627771_at   |           | CG13075 | 2.58                 | 2.91                 | 1.93                 | HG, MT          |
| 1630590_at   |           | CG18417 | 2.02                 | 3.48                 | 4.35                 | MG, HG          |
| 1624393_at   | w         | CG2759  | 1.77                 | 4.97                 | 4.5                  | MT              |
| 1632003_a_at | Ptp99A    | CG11516 | 1.53                 | 1.41                 | 2.32                 | ID, NS, T       |
| 1632404_at   | rtet      | CG5760  | 1.02                 | 0.85                 | 2.09                 | MG, HG, I       |
| 1633369_s_at |           | CG6184  | -0.23                | -0.21                | -0.68                | NS, tes         |
| 1637389_at   | lr100a    | CG11575 | -0.67                | -0.68                | -2.61                | non-spec        |
| 1635901_at   |           | CG17197 | -0.85                | -0.63                | -1.09                | ID, tes         |
| 1624020_at   | mod(mdg4) | CG32491 | -1                   | -1.4                 | -0.57                | NS, ID          |
| 1640850_at   | cindr     | CG31012 | -1.11                | -1.1                 | -1.02                | NS, SS, ID, tes |
| 1627953_at   | mod(mdg4) | CG32491 | -1.28                | -1.08                | -1.19                | NS, ID          |
| 1633748_at   | ND-20L    | CG2014  | -1.94                | -2.05                | -0.82                | ID, tes         |

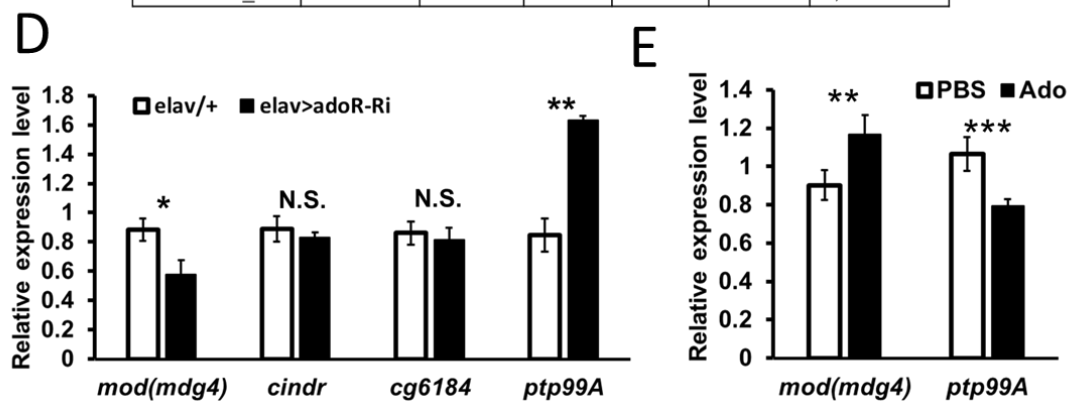

606

607 Figure 5. Identification of potential downstream targets of AdoR by microarray analysis.  
608 (A-B) Venn diagram showing the number of common genes (in intersect region) which are  
609 upregulated (A) or downregulated (B) among the *adoR* mutant larvae vs. control ( $w^{1118}$ ),  
610 *adoR* mutant adults vs. control ( $w^{1118}$ ), and *ent2* mutant larvae vs. control ( $w^{1118}$ ). The  
611 cutoff values for expression differences were set at  $Q < 0.05$  (false discovery rate, FDR).  
612 (C) The intersection between the three datasets; tissue localization of each gene expression  
613 was obtained from Flybase (<http://flybase.org/>). Tissue abbreviations: midgut (MG),  
614 hindgut (HG), Malpighian tubule (MT), imaginal disc (ID), integument (I), sensory system  
615 (SS), nervous system (NS), trachea (T), testis (tes), nonspecific expression (non-spec) (D)  
616 qPCR confirmed the potential AdoR-regulated genes expressed in the nervous system.  
617 Expression of *adoR* RNAi transgenes (*adoR*-Ri) was driven by the pan-neuronal driver  
618 (*elav*>*adoR*-Ri), and control flies contained *elav*-GAL4 (*elav*/+) only. (E) Enhancing  
619 extracellular adenosine signaling by adenosine injection and qPCR examination  
620 demonstrated that *mod(mdg4)* is positively- and *ptp99A* is negatively-regulated by  
621 adenosine signaling. Three independent replicates were measured in qPCR experiments.  
622 The qPCR primers of *mod(mdg4)* were selected to target the common 5' exon shared in all  
623 of the isoforms. Student's t-test was used to examine the significance of qPCR results: \* $P$   
624  $< 0.05$ , \*\* $P < 0.01$ , \*\*\* $P < 0.001$ ; N.S., not significant. Error bars are presented as averages  
625  $\pm$  SEM

626

627

628

629

630

631

632

633

634

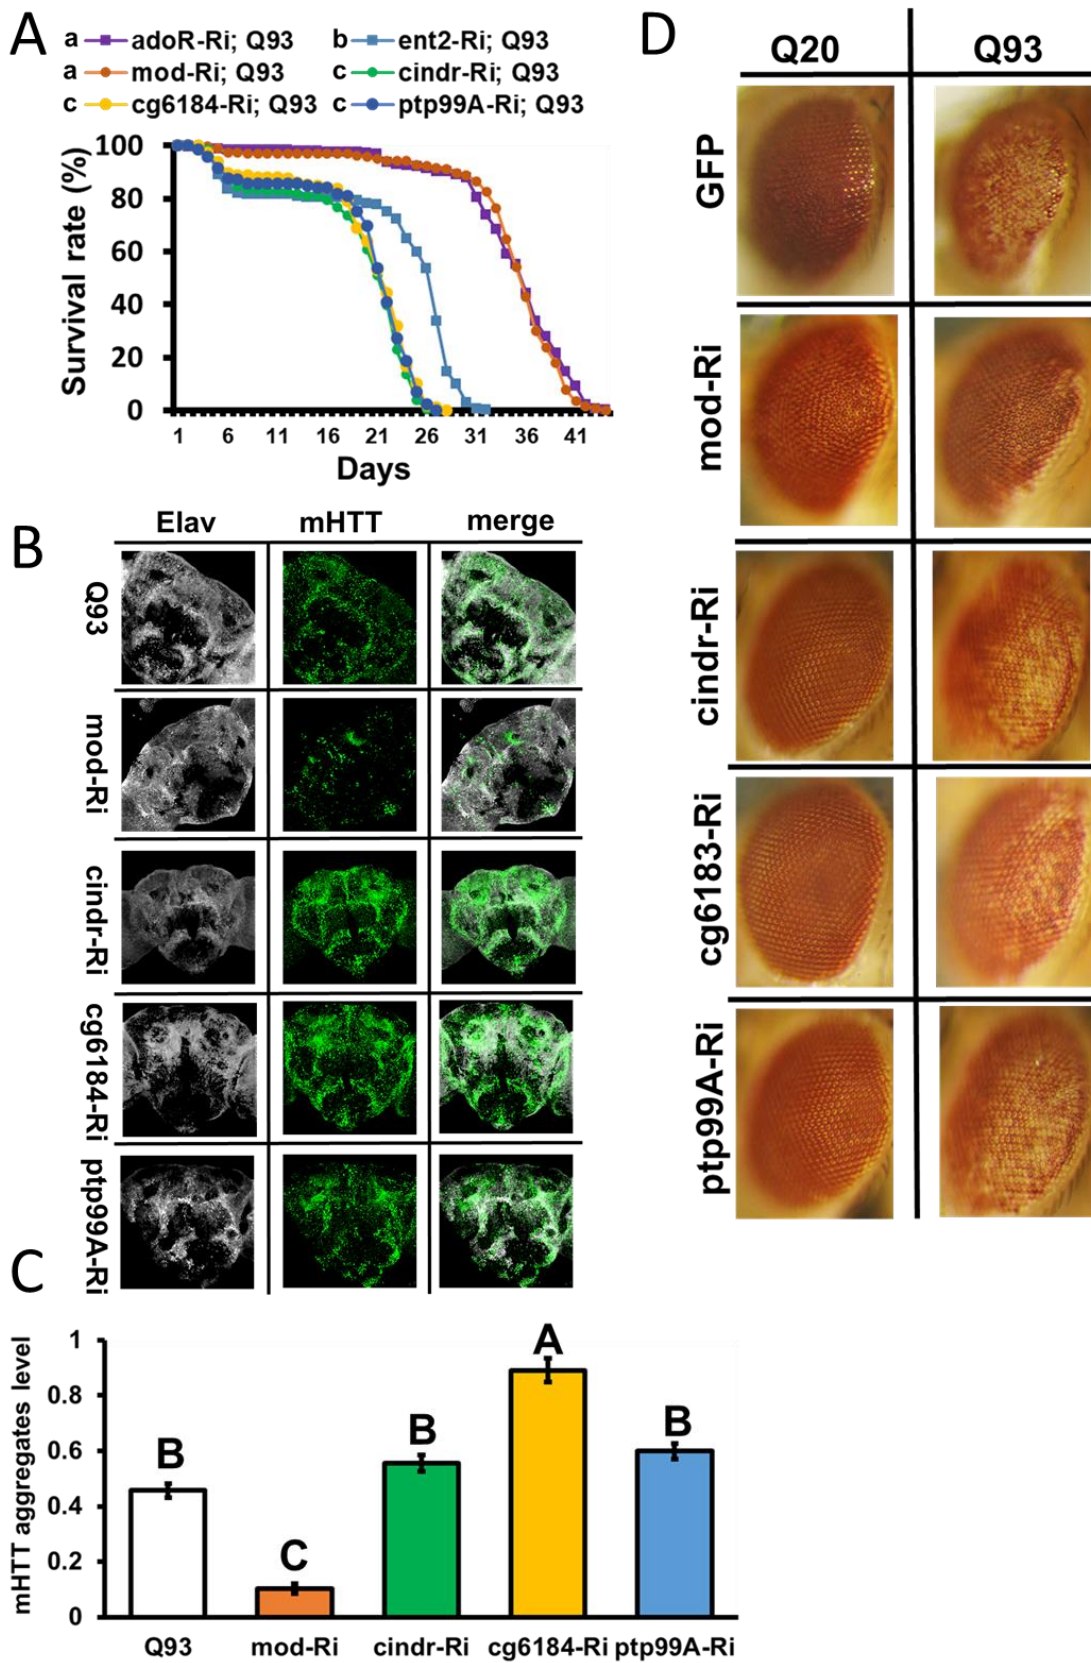

635

636 Figure 6. RNAi-mediated (Ri) downregulation of potential downstream targets of AdoR  
637 signaling in HD *Drosophila*. Co-expression of Q93 with each RNAi transgene, including  
638 *ptp99A*, *CG6184*, *cindr*, and *mod(mdg4)*, were driven by the pan-neuronal driver, *elav*-  
639 GAL4 (A-B), or the eye driver, *gmr*-GAL4 (D). The adult lifespan (A), mHTT aggregate  
640 levels (B-C), and retinal pigment cell degeneration (D) were compared. A detailed  
641 methodology of the lifespan assay, eye imaging, and quantification of mHTT aggregates  
642 are described in Materials and methods. Significance values of the adult lifespan curve (A)  
643 were analyzed by a weighted log-rank test, and different letters indicate significant  
644 differences ( $P < 0.05$ ) among treatment groups. Significance values of mHTT aggregate  
645 levels (C) were analyzed by ANOVA with Tukey's HSD *post-hoc* test; significant  
646 differences ( $P < 0.05$ ) among treatment groups are marked with different letters. Error bars  
647 are presented as mean  $\pm$  SEM

648

649

650

651

652

653

654

655

656

657

658

659

660

661

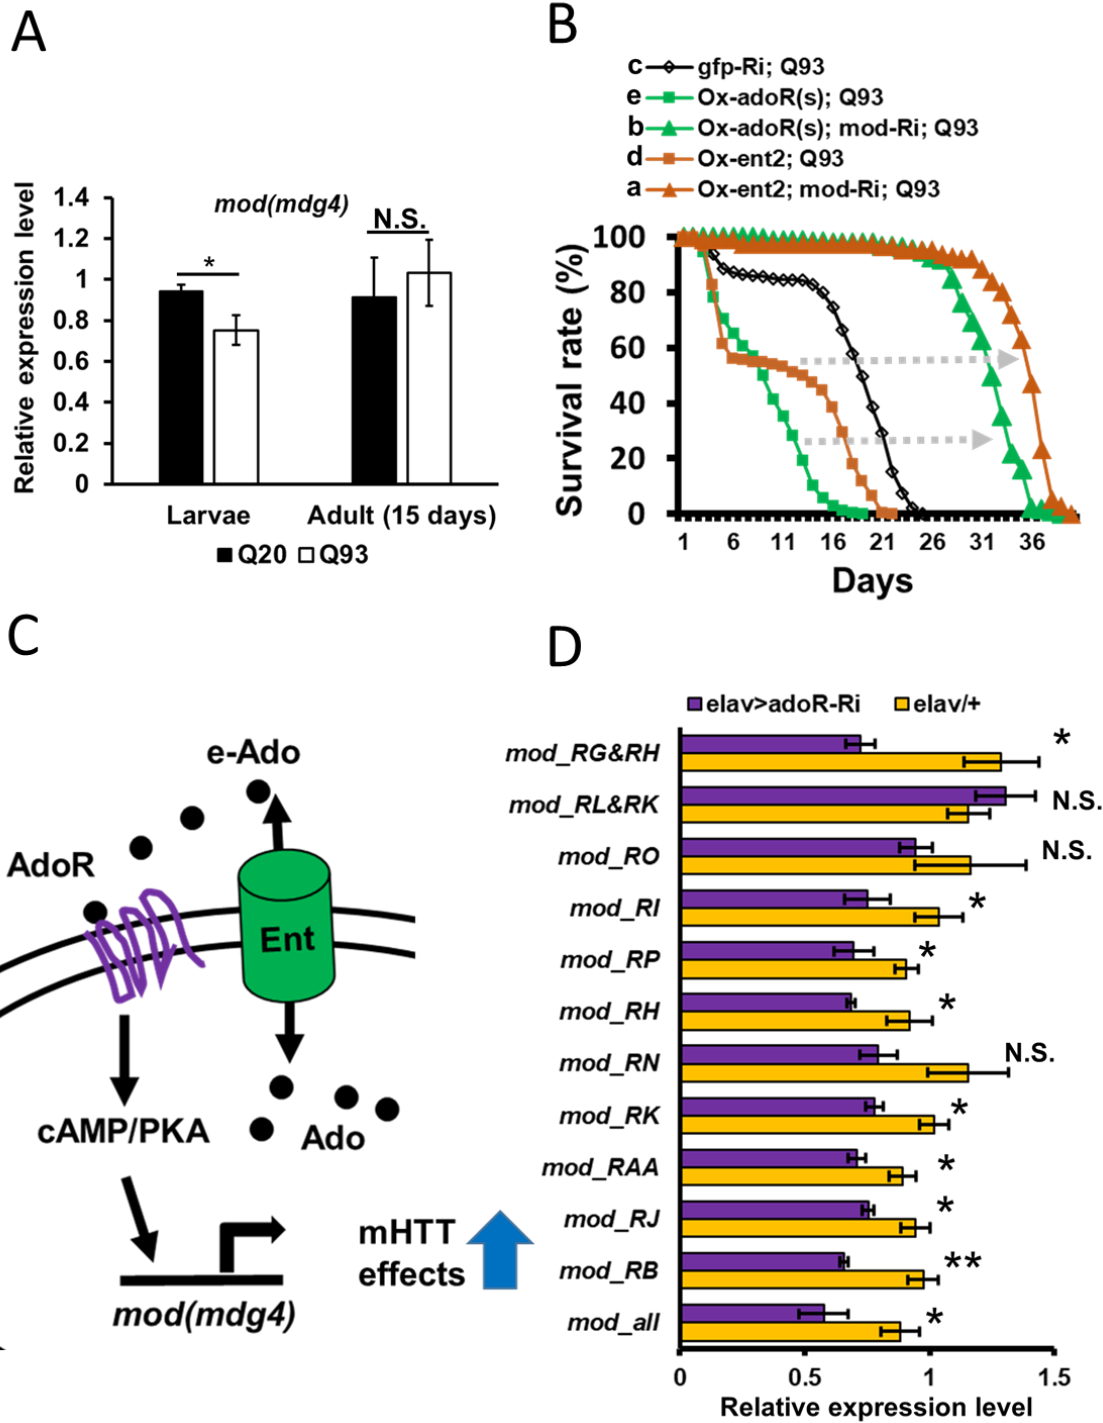

662

663

664

665 Figure 7. *mod(mdg4)* as a AdoR-regulated gene contributes to HD pathogenesis. (A) qPCR  
666 analysis of the expression of *mod(mdg4)* in the larval brain and 15-day-old adult heads of  
667 Q20- and Q93-expressing flies. The qPCR primers of *mod(mdg4)* targeted the common 5'  
668 exon shared by all isoforms. (B) Epistasis analysis showed that *ent2* (Ox-ent2) and *adoR*  
669 overexpression (Ox-adoR) with *mod(mdg4)* RNAi transgenes in HD flies decreased the  
670 mortality effect caused by *ent2* and *adoR* overexpression. This suggests that *mod(mdg4)* is  
671 downstream of the AdoR pathway (C). qPCR identified potential *mod(mdg4)* isoforms  
672 regulated by the AdoR pathway. *adoR* RNAi transgene (*adoR-Ri*) expression was driven  
673 by the pan-neuronal driver (*elav>adoR-Ri*); control flies contained only *elav-GAL4*  
674 (*elav/+*). Mod\_all indicates that the primers targeted all *mod(mdg4)* isoforms. Isoforms L  
675 and G do not have their own unique exonal region, therefore it is possible for the qPCR  
676 primers to target two isoforms simultaneously (presented as RG&RG and RL&RK). qPCR  
677 result significance was examined using Student's t-test: \* $P < 0.05$ , \*\* $P < 0.01$ , \*\*\* $P <$   
678  $0.001$ ; N.S., not significant. Significance values for the adult lifespan curve (A) were  
679 analyzed by weighted log-rank test, and different letters indicate significant differences ( $P$   
680  $< 0.05$ ) among treatment groups. Error bars are presented as mean  $\pm$  SEM

681

682

683

684

685

686

687

688

689

690

691

## 692 **Acknowledgements**

693 We thank Dr. Ingrid Poernbacher (The Francis Crick Institute, UK), Prof. Lawrence Marsh  
694 (UC Irvine, USA), Dr. Marek Jindra (Biology Centre CAS, Czechia), Dr. Tomas Dolezal  
695 (University of South Bohemia, Czechia), Dr. Ulrich Theopold (Stockholm University),  
696 Bloomington *Drosophila* Stock Center and Vienna *Drosophila* Resource Center for  
697 providing us with fly strains. This work was supported by the grant agency of the  
698 University of South Bohemia (065/2017/P to Y-HL), junior grant project GACR (19-  
699 13784Y to LK) and European Community's Programme Interreg Österreich-Tschechische  
700 Republik (REGGEN/ATCZ207 to MZ).

## 701 **Author Contributions**

702 Y-HL performed the experiments and prepared the manuscript. HM assisted in recording  
703 the adult lifespan and eye phenotypes as well as performed the brain dissection,  
704 immunochemistry and confocal microscopy imaging. LK performed the sample  
705 preparation and analyzed the microarray data. LR assisted in recording the adult lifespan,  
706 eye phenotype and prepared fly strains. TF established the methodologies for recording the  
707 eclosion rate, survival and prepared fly strains. MZ conceived the project and supervised  
708 manuscript preparation.

709

710

## 711 **References**

- 712 Albagli, O., Dhordain, P., Deweindt, C., Lecocq, G., & Leprince, D. (1995). The BTB/POZ domain: a  
713 new protein-protein interaction motif common to DNA- and actin-binding proteins. *Cell*  
714 *Growth Differ*, *6*(9), 1193-1198.
- 715 Anderson, C. M., & Nedergaard, M. (2006). Emerging challenges of assigning P2X7 receptor  
716 function and immunoreactivity in neurons. *Trends Neurosci*, *29*(5), 257-262.  
717 doi:10.1016/j.tins.2006.03.003
- 718 Arefin, B., Kucerova, L., Dobes, P., Markus, R., Strnad, H., Wang, Z., . . . Theopold, U. (2014).  
719 Genome-wide transcriptional analysis of *Drosophila* larvae infected by  
720 entomopathogenic nematodes shows involvement of complement, recognition and  
721 extracellular matrix proteins. *J Innate Immun*, *6*(2), 192-204. doi:10.1159/000353734
- 722 Aymerich, I., Fougelle, F., Ferre, P., Casado, F. J., & Pastor-Anglada, M. (2006). Extracellular  
723 adenosine activates AMP-dependent protein kinase (AMPK). *J Cell Sci*, *119*(Pt 8), 1612-  
724 1621. doi:10.1242/jcs.02865



- 725 Bajgar, A., & Dolezal, T. (2018). Extracellular adenosine modulates host-pathogen interactions  
726 through regulation of systemic metabolism during immune response in *Drosophila*. *PLoS*  
727 *Pathog*, 14(4), e1007022. doi:10.1371/journal.ppat.1007022
- 728 Bajgar, A., Kucerova, K., Jonatova, L., Tomcala, A., Schneedorferova, I., Okrouhlik, J., & Dolezal,  
729 T. (2015). Extracellular adenosine mediates a systemic metabolic switch during immune  
730 response. *PLoS Biol*, 13(4), e1002135. doi:10.1371/journal.pbio.1002135
- 731 Bardwell, V. J., & Treisman, R. (1994). The POZ domain: a conserved protein-protein interaction  
732 motif. *Genes Dev*, 8(14), 1664-1677. doi:10.1101/gad.8.14.1664
- 733 Blum, D., Chern, E. C., Domenici, M. R., Buée, L., Lin, C. Y., Ferré, S., & Popoli, P. (2018). What Is  
734 the Role of Adenosine Tone and Adenosine Receptors in Huntington's Disease? In P. A.  
735 Borea, K. Varani, S. Gessi, S. Merighi, & F. Vincenzi (Eds.), *The Adenosine Receptors* (pp.  
736 281-308). Cham: Springer International Publishing.
- 737 Blum, D., Chern, Y., Domenici, M. R., Buee, L., Lin, C. Y., Rea, W., . . . Popoli, P. (2018). The Role  
738 of Adenosine Tone and Adenosine Receptors in Huntington's Disease. *J Caffeine*  
739 *Adenosine Res*, 8(2), 43-58. doi:10.1089/caff.2018.0006
- 740 Blum, D., Hourez, R., Galas, M.-C., Popoli, P., & Schiffmann, S. N. (2003). Adenosine receptors  
741 and Huntington's disease: implications for pathogenesis and therapeutics. *The Lancet*  
742 *Neurology*, 2(6), 366-374. doi:[https://doi.org/10.1016/S1474-4422\(03\)00411-3](https://doi.org/10.1016/S1474-4422(03)00411-3)
- 743 Blum, D., Hourez, R., Galas, M. C., Popoli, P., & Schiffmann, S. N. (2003). Adenosine receptors  
744 and Huntington's disease: implications for pathogenesis and therapeutics. *Lancet*  
745 *Neurol*, 2(6), 366-374. doi:10.1016/s1474-4422(03)00411-3
- 746 Braco, J. T., Gillespie, E. L., Alberto, G. E., Brenman, J. E., & Johnson, E. C. (2012). Energy-  
747 dependent modulation of glucagon-like signaling in *Drosophila* via the AMP-activated  
748 protein kinase. *Genetics*, 192(2), 457-466. doi:10.1534/genetics.112.143610
- 749 Buchner, K., Roth, P., Schotta, G., Krauss, V., Saumweber, H., Reuter, G., & Dorn, R. (2000).  
750 Genetic and molecular complexity of the position effect variegation modifier  
751 mod(mdg4) in *Drosophila*. *Genetics*, 155(1), 141-157.
- 752 Chan, H. Y., Warrick, J. M., Gray-Board, G. L., Paulson, H. L., & Bonini, N. M. (2000). Mechanisms  
753 of chaperone suppression of polyglutamine disease: selectivity, synergy and modulation  
754 of protein solubility in *Drosophila*. *Hum Mol Genet*, 9(19), 2811-2820.  
755 doi:10.1093/hmg/9.19.2811
- 756 Cunha, R. A. (2001). Adenosine as a neuromodulator and as a homeostatic regulator in the  
757 nervous system: different roles, different sources and different receptors.  
758 *Neurochemistry International*, 38(2), 107-125. doi:Doi 10.1016/S0197-0186(00)00034-6
- 759 Cunha, R. A. (2019). Signaling by adenosine receptors-Homeostatic or allostatic control? *PLoS*  
760 *Biol*, 17(4), e3000213. doi:10.1371/journal.pbio.3000213
- 761 Dolezal, T., Dolezelova, E., Zurovec, M., & Bryant, P. J. (2005). A role for adenosine deaminase in  
762 *Drosophila* larval development. *PLoS Biol*, 3(7), e201. doi:10.1371/journal.pbio.0030201
- 763 Dolezal, T., Gazi, M., Zurovec, M., & Bryant, P. J. (2003). Genetic analysis of the ADGF multigene  
764 family by homologous recombination and gene conversion in *Drosophila*. *Genetics*,  
765 165(2), 653-666.
- 766 Dolezelova, E., Nothacker, H. P., Civelli, O., Bryant, P. J., & Zurovec, M. (2007). A *Drosophila*  
767 adenosine receptor activates cAMP and calcium signaling. *Insect Biochem Mol Biol*,  
768 37(4), 318-329. doi:10.1016/j.ibmb.2006.12.003
- 769 Dolinar, K., Jan, V., Pavlin, M., Chibalin, A. V., & Pirkmajer, S. (2018). Nucleosides block AICAR-  
770 stimulated activation of AMPK in skeletal muscle and cancer cells. *Am J Physiol Cell*  
771 *Physiol*, 315(6), C803-C817. doi:10.1152/ajpcell.00311.2017

- 772 Domenici, M. R., Scattoni, M. L., Martire, A., Lastoria, G., Potenza, R. L., Borioni, A., . . . Popoli, P.  
773 (2007). Behavioral and electrophysiological effects of the adenosine A2A receptor  
774 antagonist SCH 58261 in R6/2 Huntington's disease mice. *Neurobiol Dis*, 28(2), 197-205.  
775 doi:10.1016/j.nbd.2007.07.009
- 776 Dorn, R., & Krauss, V. (2003). The modifier of mdg4 locus in Drosophila: functional complexity is  
777 resolved by trans splicing. *Genetica*, 117(2), 165-177. doi:10.1023/A:1022983810016
- 778 Dunwiddie, T. V., & Masino, S. A. (2001). The role and regulation of adenosine in the central  
779 nervous system. *Annu Rev Neurosci*, 24, 31-55. doi:10.1146/annurev.neuro.24.1.31
- 780 Espinas, M. L., Jimenez-Garcia, E., Vaquero, A., Canudas, S., Bernues, J., & Azorin, F. (1999). The  
781 N-terminal POZ domain of GAGA mediates the formation of oligomers that bind DNA  
782 with high affinity and specificity. *J Biol Chem*, 274(23), 16461-16469.  
783 doi:10.1074/jbc.274.23.16461
- 784 Fleischmannova, J., Kucerova, L., Sandova, K., Steinbauerova, V., Broz, V., Simek, P., & Zurovec,  
785 M. (2012). Differential response of Drosophila cell lines to extracellular adenosine.  
786 *Insect Biochem Mol Biol*, 42(5), 321-331. doi:10.1016/j.ibmb.2012.01.002
- 787 Fountain, S. J. (2013). Primitive ATP-activated P2X receptors: discovery, function and  
788 pharmacology. *Front Cell Neurosci*, 7, 247. doi:10.3389/fncel.2013.00247
- 789 Fredholm, B. B. (2007). Adenosine, an endogenous distress signal, modulates tissue damage and  
790 repair. *Cell Death Differ*, 14(7), 1315-1323. doi:10.1038/sj.cdd.4402132
- 791 Gianfriddo, M., Melani, A., Turchi, D., Giovannini, M. G., & Pedata, F. (2004). Adenosine and  
792 glutamate extracellular concentrations and mitogen-activated protein kinases in the  
793 striatum of Huntington transgenic mice. Selective antagonism of adenosine A2A  
794 receptors reduces transmitter outflow. *Neurobiol Dis*, 17(1), 77-88.  
795 doi:10.1016/j.nbd.2004.05.008
- 796 Giot, L., Bader, J. S., Brouwer, C., Chaudhuri, A., Kuang, B., Li, Y., . . . Rothberg, J. M. (2003). A  
797 protein interaction map of Drosophila melanogaster. *Science*, 302(5651), 1727-1736.  
798 doi:10.1126/science.1090289
- 799 Glass, M., Dragunow, M., & Faull, R. L. M. (2000). The pattern of neurodegeneration in  
800 Huntington's disease: A comparative study of cannabinoid, dopamine, adenosine and  
801 GABA(A) receptor alterations in the human basal ganglia in Huntington's disease.  
802 *Neuroscience*, 97(3), 505-519. doi:10.1016/S0306-4522(00)00008-7
- 803 Gomes, C. V., Kaster, M. P., Tome, A. R., Agostinho, P. M., & Cunha, R. A. (2011). Adenosine  
804 receptors and brain diseases: Neuroprotection and neurodegeneration. *Biochimica Et*  
805 *Biophysica Acta-Biomembranes*, 1808(5), 1380-1399.  
806 doi:10.1016/j.bbamem.2010.12.001
- 807 Guitart, X., Bonaventura, J., Rea, W., Orru, M., Cellai, L., Dettori, I., . . . Ferre, S. (2016).  
808 Equilibrative nucleoside transporter ENT1 as a biomarker of Huntington disease.  
809 *Neurobiol Dis*, 96, 47-53. doi:10.1016/j.nbd.2016.08.013
- 810 Han, S. K., Lee, D., Lee, H., Kim, D., Son, H. G., Yang, J. S., . . . Kim, S. (2016). OASIS 2: online  
811 application for survival analysis 2 with features for the analysis of maximal lifespan and  
812 healthspan in aging research. *Oncotarget*, 7(35), 56147-56152.  
813 doi:10.18632/oncotarget.11269
- 814 Johnson, E. C., Kazgan, N., Bretz, C. A., Forsberg, L. J., Hector, C. E., Worthen, R. J., . . . Brenman,  
815 J. E. (2010). Altered metabolism and persistent starvation behaviors caused by reduced  
816 AMPK function in Drosophila. *PLoS One*, 5(9). doi:10.1371/journal.pone.0012799
- 817 Ju, T. C., Chen, H. M., Lin, J. T., Chang, C. P., Chang, W. C., Kang, J. J., . . . Chern, Y. (2011). Nuclear  
818 translocation of AMPK-alpha1 potentiates striatal neurodegeneration in Huntington's  
819 disease. *J Cell Biol*, 194(2), 209-227. doi:10.1083/jcb.201105010

- 820 Kao, Y. H., Lin, M. S., Chen, C. M., Wu, Y. R., Chen, H. M., Lai, H. L., . . . Lin, C. J. (2017a). Targeting  
821 ENT1 and adenosine tone for the treatment of Huntington's disease. *Hum Mol Genet*,  
822 26(3), 467-478. doi:10.1093/hmg/ddw402
- 823 Kao, Y. H., Lin, M. S., Chen, C. M., Wu, Y. R., Chen, H. M., Lai, H. L., . . . Lin, C. J. (2017b). Targeting  
824 ENT1 and adenosine tone for the treatment of Huntington's disease. *Human Molecular  
825 Genetics*, 26(3), 467-478. doi:10.1093/hmg/ddw402
- 826 Knight, D., Harvey, P. J., Iliadi, K. G., Klose, M. K., Iliadi, N., Dolezelova, E., . . . Boulianne, G. L.  
827 (2010). Equilibrative nucleoside transporter 2 regulates associative learning and synaptic  
828 function in *Drosophila*. *J Neurosci*, 30(14), 5047-5057. doi:10.1523/JNEUROSCI.6241-  
829 09.2010
- 830 Krauss, V., & Dorn, R. (2004). Evolution of the trans-splicing *Drosophila* locus *mod(mdg4)* in  
831 several species of Diptera and Lepidoptera. *Gene*, 331, 165-176.  
832 doi:10.1016/j.gene.2004.02.019
- 833 Kucerova, L., Broz, V., Arefin, B., Maaroufi, H. O., Hurychova, J., Strnad, H., . . . Theopold, U.  
834 (2016). The *Drosophila* Chitinase-Like Protein IDGF3 Is Involved in Protection against  
835 Nematodes and in Wound Healing. *J Innate Immun*, 8(2), 199-210.  
836 doi:10.1159/000442351
- 837 Kucerova, L., Broz, V., Fleischmannova, J., Santruckova, E., Sidorov, R., Dolezal, V., & Zurovec, M.  
838 (2012). Characterization of the *Drosophila* adenosine receptor: the effect of adenosine  
839 analogs on cAMP signaling in *Drosophila* cells and their utility for in vivo experiments. *J  
840 Neurochem*, 121(3), 383-395. doi:10.1111/j.1471-4159.2012.07701.x
- 841 Kuo, Y., Ren, S., Lao, U., Edgar, B. A., & Wang, T. (2013). Suppression of polyglutamine protein  
842 toxicity by co-expression of a heat-shock protein 40 and a heat-shock protein 110. *Cell  
843 Death Dis*, 4, e833. doi:10.1038/cddis.2013.351
- 844 Lee, C. F., & Chern, Y. J. (2014). Adenosine Receptors and Huntington's Disease. *Adenosine  
845 Receptors in Neurology and Psychiatry*, 119, 195-232. doi:10.1016/B978-0-12-801022-  
846 8.00010-6
- 847 Lewis, E. A., & Smith, G. A. (2016). Using *Drosophila* models of Huntington's disease as a  
848 translatable tool. *J Neurosci Methods*, 265, 89-98. doi:10.1016/j.jneumeth.2015.07.026
- 849 Liu, H., Adebisi, M., Liu, R. R., Song, A., Manalo, J., Wen, Y. E., . . . Xia, Y. (2018). Elevated ecto-5'-  
850 nucleotidase: a missing pathogenic factor and new therapeutic target for sickle cell  
851 disease. *Blood Adv*, 2(15), 1957-1968. doi:10.1182/bloodadvances.2018015784
- 852 Maier, S. A., Galellis, J. R., & McDermid, H. E. (2005). Phylogenetic analysis reveals a novel  
853 protein family closely related to adenosine deaminase. *J Mol Evol*, 61(6), 776-794.  
854 doi:10.1007/s00239-005-0046-y
- 855 Martinez-Mir, M. I., Probst, A., & Palacios, J. M. (1991). Adenosine-A2 Receptors - Selective  
856 Localization in the Human Basal Ganglia and Alterations with Disease. *Neuroscience*,  
857 42(3), 697-706. doi:10.1016/0306-4522(91)90038-P
- 858 Medina-Pulido, L., Molina-Arcas, M., Justicia, C., Soriano, E., Burgaya, F., Planas, A. M., & Pastor-  
859 Anglada, M. (2013). Hypoxia and P1 receptor activation regulate the high-affinity  
860 concentrative adenosine transporter CNT2 in differentiated neuronal PC12 cells.  
861 *Biochem J*, 454(3), 437-445. doi:10.1042/BJ20130231
- 862 Melnikova, L., Kostyuchenko, M., Parshikov, A., Georgiev, P., & Golovnin, A. (2018). Role of  
863 Su(Hw) zinc finger 10 and interaction with CP190 and Mod(mdg4) proteins in recruiting  
864 the Su(Hw) complex to chromatin sites in *Drosophila*. *PLoS One*, 13(2), e0193497.  
865 doi:10.1371/journal.pone.0193497

- 866 Mieviss, S., Blum, D., & Ledent, C. (2011). A2A receptor knockout worsens survival and motor  
867 behaviour in a transgenic mouse model of Huntington's disease. *Neurobiol Dis*, *41*(2),  
868 570-576. doi:10.1016/j.nbd.2010.09.021
- 869 Mugat, B., Parmentier, M. L., Bonneaud, N., Chan, H. Y., & Maschat, F. (2008). Protective role of  
870 Engrailed in a Drosophila model of Huntington's disease. *Hum Mol Genet*, *17*(22), 3601-  
871 3616. doi:10.1093/hmg/ddn255
- 872 Mutsuddi, M., Marshall, C. M., Benzow, K. A., Koob, M. D., & Rebay, I. (2004). The  
873 spinocerebellar ataxia 8 noncoding RNA causes neurodegeneration and associates with  
874 staufer in Drosophila. *Curr Biol*, *14*(4), 302-308. doi:10.1016/j.cub.2004.01.034
- 875 Oughtred, R., Stark, C., Breitkreutz, B. J., Rust, J., Boucher, L., Chang, C., . . . Tyers, M. (2019). The  
876 BioGRID interaction database: 2019 update. *Nucleic Acids Res*, *47*(D1), D529-D541.  
877 doi:10.1093/nar/gky1079
- 878 Picano, E., & Abbracchio, M. P. (2000). Adenosine, the imperfect endogenous anti-ischemic  
879 cardio-neuroprotector. *Brain Res Bull*, *52*(2), 75-82. doi:10.1016/s0361-9230(00)00249-5
- 880 Poernbacher, I., & Vincent, J. P. (2018). Epithelial cells release adenosine to promote local TNF  
881 production in response to polarity disruption. *Nat Commun*, *9*(1), 4675.  
882 doi:10.1038/s41467-018-07114-z
- 883 Ruan, C. C., Kong, L. R., Chen, X. H., Ma, Y., Pan, X. X., Zhang, Z. B., & Gao, P. J. (2018). A(2A)  
884 Receptor Activation Attenuates Hypertensive Cardiac Remodeling via Promoting Brown  
885 Adipose Tissue-Derived FGF21. *Cell Metabolism*, *28*(3), 476-+.  
886 doi:10.1016/j.cmet.2018.06.013
- 887 Soltani-Bejnood, M., Thomas, S. E., Villeneuve, L., Schwartz, K., Hong, C. S., & McKee, B. D.  
888 (2007). Role of the mod(mdg4) common region in homolog segregation in Drosophila  
889 male meiosis. *Genetics*, *176*(1), 161-180. doi:10.1534/genetics.106.063289
- 890 Song, W., Smith, M. R., Syed, A., Lukacsovich, T., Barbaro, B. A., Purcell, J., . . . Marsh, J. L. (2013).  
891 Morphometric analysis of Huntington's disease neurodegeneration in Drosophila.  
892 *Methods Mol Biol*, *1017*, 41-57. doi:10.1007/978-1-62703-438-8\_3
- 893 Soshnev, A. A., Baxley, R. M., Manak, J. R., Tan, K., & Geyer, P. K. (2013). The insulator protein  
894 Suppressor of Hairy-wing is an essential transcriptional repressor in the Drosophila  
895 ovary. *Development*, *140*(17), 3613-3623. doi:10.1242/dev.094953
- 896 Steffan, J. S., Bodai, L., Pallos, J., Poelman, M., McCampbell, A., Apostol, B. L., . . . Thompson, L.  
897 M. (2001). Histone deacetylase inhibitors arrest polyglutamine-dependent  
898 neurodegeneration in Drosophila. *Nature*, *413*(6857), 739-743. doi:10.1038/35099568
- 900 Stenesen, D., Suh, J. M., Seo, J., Yu, K., Lee, K. S., Kim, J. S., . . . Graff, J. M. (2013). Adenosine  
901 nucleotide biosynthesis and AMPK regulate adult life span and mediate the longevity  
902 benefit of caloric restriction in flies. *Cell Metab*, *17*(1), 101-112.  
903 doi:10.1016/j.cmet.2012.12.006
- 904 Swick, L. L., Kazgan, N., Onyenwoke, R. U., & Brenman, J. E. (2013). Isolation of AMP-activated  
905 protein kinase (AMPK) alleles required for neuronal maintenance in Drosophila  
906 melanogaster. *Biol Open*, *2*(12), 1321-1323. doi:10.1242/bio.20136775
- 907 Thomas, S. E., Soltani-Bejnood, M., Roth, P., Dorn, R., Logsdon, J. M., Jr., & McKee, B. D. (2005).  
908 Identification of two proteins required for conjunction and regular segregation of  
909 achiasmata homologs in Drosophila male meiosis. *Cell*, *123*(4), 555-568.  
910 doi:10.1016/j.cell.2005.08.043
- 911 Toczek, M., Zielonka, D., Zukowska, P., Marcinkowski, J. T., Slominska, E., Isalan, M., . . .  
912 Mielcarek, M. (2016). An impaired metabolism of nucleotides underpins a novel  
913 mechanism of cardiac remodeling leading to Huntington's disease related

- 914 cardiomyopathy. *Biochim Biophys Acta*, 1862(11), 2147-2157.  
915 doi:10.1016/j.bbadis.2016.08.019
- 916 Tyebji, S., Saavedra, A., Canas, P. M., Pliassova, A., Delgado-Garcia, J. M., Alberch, J., . . . Perez-  
917 Navarro, E. (2015). Hyperactivation of D1 and A2A receptors contributes to cognitive  
918 dysfunction in Huntington's disease. *Neurobiol Dis*, 74, 41-57.  
919 doi:10.1016/j.nbd.2014.11.004
- 920 van Eyk, C. L., O'Keefe, L. V., Lawlor, K. T., Samaraweera, S. E., McLeod, C. J., Price, G. R., . . .  
921 Richards, R. I. (2011). Perturbation of the Akt/Gsk3-beta signalling pathway is common  
922 to Drosophila expressing expanded untranslated CAG, CUG and AUUCU repeat RNAs.  
923 *Hum Mol Genet*, 20(14), 2783-2794. doi:10.1093/hmg/ddr177
- 924 Vazquez-Manrique, R. P., Farina, F., Cambon, K., Dolores Sequedo, M., Parker, A. J., Millan, J.  
925 M., . . . Neri, C. (2016). AMPK activation protects from neuronal dysfunction and  
926 vulnerability across nematode, cellular and mouse models of Huntington's disease. *Hum*  
927 *Mol Genet*, 25(6), 1043-1058. doi:10.1093/hmg/ddv513
- 928 Vonsattel, J. P., & DiFiglia, M. (1998). Huntington disease. *J Neuropathol Exp Neurol*, 57(5), 369-  
929 384. doi:10.1097/00005072-199805000-00001
- 930 Warrick, J. M., Chan, H. Y., Gray-Board, G. L., Chai, Y., Paulson, H. L., & Bonini, N. M. (1999).  
931 Suppression of polyglutamine-mediated neurodegeneration in Drosophila by the  
932 molecular chaperone HSP70. *Nat Genet*, 23(4), 425-428. doi:10.1038/70532
- 933 Xiao, C., Liu, N., Jacobson, K. A., Gavrilova, O., & Reitman, M. L. (2019). Physiology and effects of  
934 nucleosides in mice lacking all four adenosine receptors. *PLoS Biol*, 17(3), e3000161.  
935 doi:10.1371/journal.pbio.3000161
- 936 Yu, S., Waldholm, J., Bohm, S., & Visa, N. (2014). Brahma regulates a specific trans-splicing event  
937 at the mod(mdg4) locus of Drosophila melanogaster. *RNA Biol*, 11(2), 134-145.  
938 doi:10.4161/rna.27866
- 939 Zuberova, M., Fenckova, M., Simek, P., Janeckova, L., & Dolezal, T. (2010). Increased  
940 extracellular adenosine in Drosophila that are deficient in adenosine deaminase  
941 activates a release of energy stores leading to wasting and death. *Dis Model Mech*, 3(11-  
942 12), 773-784. doi:10.1242/dmm.005389
- 943 Zurovec, M., Dolezal, T., Gazi, M., Pavlova, E., & Bryant, P. J. (2002). Adenosine deaminase-  
944 related growth factors stimulate cell proliferation in Drosophila by depleting  
945 extracellular adenosine. *Proc Natl Acad Sci U S A*, 99(7), 4403-4408.  
946 doi:10.1073/pnas.062059699

947
