1 **Adenosine signaling and its downstream target *mod(mdg4)* modify the pathogenic**  
2 **effects of polyglutamine in a *Drosophila* model of Huntington's disease**

3

4 Yu-Hsien Lin<sup>1,2\*</sup>, Houda Ouns Maaroufi<sup>1,2</sup>, Lucie Kucerova<sup>1</sup>, Lenka Rouhova<sup>1,2</sup>, Tomas  
5 Filip<sup>1,2</sup>, Michal Zurovec<sup>1,2\*</sup>

6 <sup>1</sup>Biology Centre of the Czech Academy of Sciences, Institute of Entomology, Ceske  
7 Budejovice, Czech Republic, <sup>2</sup>Faculty of Science, University of South Bohemia, Ceske  
8 Budejovice, Czech Republic

9

10 \*Correspondence and requests for materials should be addressed to Y.H.L. (email:  
11 r99632012@gmail.com) and M.Z. (email: zurovec@entu.cas.cz).

12

13 **Abstract**

14 Dysregulation of adenosine (Ado) homeostasis has been observed in both rodent models  
15 and human patients of Huntington's disease (HD). However, the underlying mechanisms  
16 of Ado signaling in HD pathogenesis are still unclear. In the present study, we used a  
17 *Drosophila* HD model to examine the concentration of extracellular Ado (e-Ado) as well  
18 as the transcription of genes involved in Ado homeostasis and found similar alterations.  
19 Through candidate RNAi screening, we demonstrated that silencing the expression of  
20 adenosine receptor (*adoR*) and equilibrative nucleoside transporter 2 (*ent2*) not only  
21 significantly increases the survival of HD flies but also suppresses both retinal pigment cell  
22 degeneration and the formation of mutant Huntingtin (mHTT) aggregates in the brain. We  
23 compared the transcription profiles of *adoR* and *ent2* mutants by microarray analysis and  
24 identified a downstream target of AdoR signaling, *mod(mdg4)*, which mediates the effects  
25 of AdoR on HD pathology in *Drosophila*. Our findings have important implications for the  
26 crosstalk between Ado signaling and the pathogenic effects of HD, as well as other human  
27 diseases associated with polyglutamine aggregation.

28

29

30

## 31 **Introduction**

32 Adenosine (Ado) is one of the most common neuromodulators in the nervous  
33 system of vertebrates as well as invertebrates and modulates synaptic transmission<sup>1,2</sup>.  
34 Under normal conditions, the extracellular Ado (e-Ado) concentration is in the nanomolar  
35 range, which is sufficient to modulate the appropriate adenosine receptors (AdoRs) in the  
36 brain cells tonically<sup>3</sup>. However, under pathological circumstances the e-Ado level may  
37 increase up to 100-fold. In these conditions, Ado functions as an imperfect neuroprotector;  
38 in some cases it may be beneficial and in others may worsen tissue damage<sup>4</sup>. Recent  
39 experiments with knockout mice for all four *adoRs* demonstrated that Ado signaling is less  
40 involved in baseline physiology and likely more crucial for its roles as a signal of stress,  
41 damage, and/or danger<sup>5</sup>. It has also been suggested that Ado signaling is mainly engaged  
42 when an allostatic response is needed<sup>6</sup>.

43 Due to its impact on important physiological functions in the brain, e-Ado signaling  
44 has attracted attention as a possible therapeutic agent in Huntington's disease (HD)<sup>7</sup>, a  
45 dominant hereditary neurodegenerative disorder caused by a mutation in the Huntingtin  
46 gene (*htt*). Mutated HTT protein (mHTT) contains an expanded polyglutamine (polyQ)  
47 tract encoded by 40 to more than 150 repeats of CAG trinucleotide<sup>8</sup>. Although mHTT is  
48 ubiquitously expressed in the central nervous system (CNS) and peripheral cells in HD  
49 patients, it predominantly affects striatal neurons that contain a higher density of adenosine  
50 receptors A2A (A<sub>2A</sub>R) and A1 (A<sub>1</sub>R)<sup>9</sup>. Several studies have demonstrated that the  
51 abnormality of AdoRs activity, especially A<sub>2A</sub>R in the striatum, contributes to HD  
52 pathogenesis<sup>10,11</sup>. In addition, the alteration of adenosine tone and the upregulation of  
53 striatal equilibrative nucleoside transporters (ENTs), facilitating Ado transport across the  
54 cytoplasmic membrane, suggest that e-Ado concentration could serve as a HD biomarker  
55 for assessing the initial stages of neurodegeneration<sup>12,13</sup>. However, the complexity of the  
56 system modulating Ado metabolism and the crosstalk between individual AdoRs, as well  
57 as their interactions with purinergic (P2) or dopamine receptors, impedes the  
58 characterization of HD pathophysiology and downstream mechanisms of e-Ado signaling  
59 <sup>14,15</sup>.

60 *Drosophila* expressing human mHTT has previously been demonstrated as a  
61 suitable model system for studying gene interactions in polyQ pathology, and has been  
62 used to elicit a number of modifiers for symptoms of HD<sup>16,17</sup>. *Drosophila* e-Ado signaling  
63 is a relatively simple system compared to mammals; it contains a single AdoR isoform  
64 (cAMP simulation) and lacks P2X receptors<sup>18,19</sup>. Human homologs of the *Drosophila*  
65 genes involved in the regulation of Ado homeostasis and AdoR are shown in Fig. S1. The  
66 lack of adenosine deaminase 1 (ADA1) in *Drosophila* indicates that adenosine deaminase-  
67 related growth factors (ADGFs, related to ADA2), together with adenosine kinase  
68 (AdenoK), are the major metabolic enzymes converting extra- and intra-cellular adenosine  
69 to inosine and AMP, respectively<sup>20-22</sup>. e-Ado signaling in *Drosophila* is involved in  
70 regulating various physiological and pathological processes, including modulation of  
71 synaptic plasticity, JNK-mediated stress response, hematopoiesis, and metabolic switching  
72 upon immune challenges<sup>23-25</sup>.

73 In the present study, we performed a candidate RNAi screen examining the role of  
74 Ado signaling in a *Drosophila* HD model. We co-expressed exon 1 with a polyglutamine  
75 tract of normal human *htt* Q20 or pathogenic *mhtt* Q93<sup>17</sup> together with *UAS-RNAi* or *UAS*-  
76 overexpression constructs specific for *adoR*, Ado transporters, and Ado metabolic enzymes  
77 in *Drosophila*. We demonstrated that the downregulation of *adoR* and *ent2* expression  
78 reduces cell death, mortality and the formation of mHTT aggregates. In addition, we  
79 identified a number of differentially-expressed genes in response to Ado signaling and  
80 showed that *mod(mdg4)* is a downstream target of AdoR that mediates its effect in HD  
81 pathogenesis.

82

## 83 **Results**

### 84 **Phenotypes of *Drosophila* expressing mHTT**

85 To verify the effect of mHTT expression on *D. melanogaster*, we used a *UAS/GAL4* system  
86 for targeted gene expression. Flies overexpressing normal exon 1 from human huntingtin  
87 (Q20 HTT), or its mutant pathogenic form (Q93 mHTT), were driven by the pan-neuronal  
88 driver, *elav-GAL4*. The results showed that expression of mHTT under the *elav-GAL4*

89 driver in the *Drosophila* brain is not lethal during the larval stage (Fig. S2A) but reduces  
90 both the adult eclosion rate (Fig. S2B) and adult lifespan (Fig. S2C). These results are  
91 consistent with previous observations<sup>26</sup>.

## 92 **Disturbance of extracellular adenosine (e-Ado) homeostasis in HD larvae**

93 A recent study of human HD patients reported a reduced concentration of e-Ado in the  
94 cerebrospinal fluid<sup>27</sup>. To determine whether e-Ado levels are also altered in HD  
95 *Drosophila*, we compared e-Ado levels in the hemolymph of last-instar larvae ubiquitously  
96 expressing Q20 HTT and Q93 mHTT driven by the *daughterless-Gal4* driver (*da-GAL4*).  
97 The results showed that the e-Ado concentration in the hemolymph of Q93-expressing  
98 larvae was significantly lower compared to larvae expressing Q20 or control *da-GAL4* (Fig.  
99 1A).

100 Since e-Ado concentration may be associated with the level of extracellular ATP (e-ATP),  
101 we also examined its titer in the hemolymph of larvae with the same genotypes as the above  
102 experiment. As shown in Fig. 1B, there was no significant difference in e-ATP levels  
103 between Q20, Q93, and control *da-GAL4* larvae. We thus postulated that the lower level  
104 of e-Ado in Q93 larvae might be affected by changes in proteins involved in Ado  
105 metabolism or transportation.

## 106 **Altered transcriptions of genes involved in Ado homeostasis in HD *Drosophila***

107 Earlier reports have shown that the expression of several genes involved in Ado  
108 homeostasis, including Ado receptor, transporters, and genes involved in Ado metabolism,  
109 are abnormal in human HD patients as well as in HD mice<sup>28-30</sup>. Since homologous proteins  
110 have also been shown to control Ado homeostasis in flies (Fig. S1), we compared the  
111 expression of three *Drosophila adgf* genes (*adgf-a*, *adgf-c*, *adgf-d*), adenosine kinase  
112 (*adenoK*), adenosine transporters (*ent1*, *ent2*, *ent3*, *cnt2*), and adenosine receptor (*adoR*) in  
113 the brains of Q93- and Q20-expressing larvae. The results showed that the expression of  
114 *adgf-a* and *adgf-d*, as well as transporters *ent1*, *ent2*, and *ent3* in the brain of Q93 larvae  
115 were significantly lower than in Q20 larvae (Fig. 1D). The expression of *cnt2* and *adoR*  
116 showed no difference between Q93 and Q20 larvae.

117 In order to assess progressive changes in transcription profiles associated with HD  
118 pathogenesis, we further examined the expression of genes involved in Ado homeostasis  
119 in the heads of 5- and 15-day-old adults, roughly corresponding to early- and late-stage HD  
120 (Fig. S2C). Unlike in the larval stage, the expression of metabolic genes *adgf-c*, *adgf-d*,  
121 and *adenoK*, and transporter *ent1*, in five-day-old adults was found to be higher in Q93  
122 flies than Q20 flies (Fig. 1E). In addition, 15-day-old Q93 flies showed higher expression  
123 of *adgf-d* and *adenoK* (Fig. 1F). Previous studies in *Drosophila* have shown that the  
124 downregulation of the transporter *ents* decreases e-Ado concentration<sup>23,24</sup>; hence, the  
125 reduced expression of three *ent* genes could explain why the e-Ado level is lower in Q93  
126 larvae. Moreover, it has also been shown that the expression of *adgfs* as well as *adenoK*  
127 follows the levels of e-Ado upon stress conditions<sup>31,32</sup>, suggesting that the lower  
128 expression of *adgfs* in Q93 larvae and the higher expression in Q93 adults might be a  
129 consequence of elevated e-Ado concentrations resulting from HD pathogenesis.

### 130 **Functional characterization of Ado homeostasis and signaling in HD flies**

131 To understand the effects of alterations in Ado homeostasis on polyQ pathology, we used  
132 the pan-neuronal driver, *elav-GAL4*, for RNAi-mediated silencing of the genes involved in  
133 Ado transport, metabolism, and *adoR* in Q93-expressing flies and assessed their survival  
134 and formation of mHTT aggregates. In addition, we also co-expressed Q93 with RNAi  
135 transgenes in the eyes by using the *gmr-GAL4*<sup>33,34</sup> driver and compared levels of retinal  
136 pigment cell degeneration.

137 Silencing the transcriptions of Ado metabolic enzymes showed that only the RNAi of *adgf-*  
138 *D* increased the number of eclosion rate (Fig. 2A). Silencing *adgf-A* and *adenoK*, but not  
139 *adgf-D* or *adgf-C* RNAi, extended the adult lifespan of Q93-expressing flies (Fig. 2B). To  
140 ensure that the mortality of the HD flies was mainly caused by Q93 expression and not by  
141 RNAi constructs, we recorded the survival of flies co-expressing normal *htt* Q20 together  
142 with RNAi transgenes until all corresponding experimental flies (expressing Q93 together  
143 with RNAi constructs) died (Fig. S3A). However, silencing *adgfs* or *adenoK* only affected  
144 survival and did not significantly influence mHTT aggregation (Fig. 2C&D) or retinal  
145 pigment cell degeneration (Fig. 2E).

146           Next, we examined the RNAi silencing of *adoR* and Ado transporters in Q93 and  
147 control Q20 flies. The results showed that knocking down the expression of *adoR* as well  
148 as two transporters, *ent1* and *ent2*, significantly increased the eclosion rate (Fig. 3A) and  
149 adult lifespan (Fig. 3B). The RNAi silencing of *ent2* and *adoR* extended the lifespan of HD  
150 flies to 30 and 40 days, respectively, which is about 1.5~2 times longer than that of HD  
151 flies. In contrast, knocking down *ent1* expression did not change the viability of HD flies,  
152 and knocking down *ent3* did not influence the eclosion rate, although it increased mortality  
153 and shortened the lifespan of adult HD flies. The survival of control flies expressing Q20  
154 with individual RNAi constructs are shown in Fig. S3B. mHTT aggregation was  
155 significantly reduced (to 50%) in *adoR* RNAi flies (Fig. 3C&D), and a similar suppression  
156 of mHTT aggregate formation was also observed in 20-day-old HD flies (Fig. S4). An  
157 examination of eye phenotypes in *ent2* RNAi flies showed a significant reduction in retinal  
158 pigment cell death (Fig. 3E), but surprisingly we did not observe a significant rescue of  
159 cell death by silencing *adoR* (Fig S5). We therefore postulated that it might be due to  
160 insufficient RNAi efficiency for suppressing AdoR signaling in the eye. To test this, we  
161 combined Q93 flies with the *adoR* RNAi transgene under a *adoR* heterozygote mutant  
162 background (*AdoR<sup>1</sup>/+*) or with *AdoR<sup>1</sup>* homozygote mutant, and both showed significantly  
163 decreased retinal pigment cell degeneration similar to *ent2*-RNAi flies (Fig. 3E).

164 To further validate the RNAi results, we studied flies simultaneously expressing Q93 and  
165 overexpressing *ent2*, *adoR*, *adgf-A*, and *adenoK* in the brain and assessed the adult  
166 lifespans. Since silencing these genes extended the lifespan of HD flies (Figs. 2B&3B), we  
167 expected the opposite effect upon overexpression. As shown in Fig. S6A, *ent2*  
168 overexpression significantly increased the mortality of early-stage HD flies; the survival  
169 of 5-day-old flies dropped to 60% for HD flies in contrast to 90% for Q93 control flies,  
170 and the lifespan of HD flies was significantly shorter than control flies expressing either  
171 Q93 alone or together with *gfp* RNAi. Consistently, we co-expressed strong and weak *adoR*  
172 overexpressing transgenes with Q93 and both significantly increased the mortality and  
173 shortened the lifespan of Q93 flies. The effects of shortening the lifespan were more severe  
174 than with *ent2* overexpression. Nevertheless, the increase in mortality by *adgf-A* and  
175 *adenoK* overexpression was not as strong as that caused by *ent2* and *adoR* overexpression,  
176 although both still showed a significant difference to either Q93 control or Q93/*gfp* RNAi

177 control by weighted log-rank test (Fig. S6B). Hence, we concluded that overexpressing the  
178 examined genes enhances the effect of mHTT, resulting in the increased mortality of HD  
179 flies. Our results demonstrate that the overexpression and silencing of *ent2* or *adoR* has a  
180 stronger influence over HD pathology than genes involved in Ado metabolism.

### 181 **Interactions of AdoR with ENT1 and ENT2**

182 In order to investigate whether there is a synergy between the effects of AdoR and  
183 ENTs, we co-expressed *adoR* RNAi constructs with *ent1* RNAi or *ent2* RNAi in Q93-  
184 expressing flies. As shown in Fig. 4A, the silencing of both *ent2* and *adoR* has the same  
185 effect as silencing only *adoR*, indicating that ENT2 and AdoR are in the same  
186 pathway. Interestingly, the double knockdown of *ent1* and *adoR* shows a sum of individual  
187 effects on lifespan which is longer than the knockdown of *adoR* alone. There seems to be  
188 a synergy between ENT1 and AdoR suggesting that ENT1 may have its own effect, which  
189 is partially independent from AdoR signaling.

190 Next, we investigated our hypothesis that the source of e-Ado, which contributes  
191 to AdoR activation in Q93 flies, is mainly intracellular and released out of the cells by  
192 ENTs. We conducted an epistasis analysis by combining mHTT with *adoR* overexpression  
193 and *ent1* or *ent2* RNAi. The results showed that *adoR* overexpression increased the  
194 mortality of Q93 flies while the combination of *adoR* overexpression with either *ent1* or  
195 *ent2* RNAi minimized the increased mortality caused by *adoR* overexpression (Fig. 4B).  
196 Notably, Q93 flies expressing *ent2* RNAi and overexpressing *adoR* had the longest lifespan  
197 in comparison to Q93 control or *ent1* RNAi flies. These results suggest that AdoR signaling  
198 needs functional Ado transportation to carry out its effect and thus the Ado efflux from  
199 these cells is needed for AdoR activity (Fig. 4C&D). The source of e-Ado, which  
200 contributes to AdoR activation causing HD pathogenesis, seems to be intracellular and it  
201 is mainly released out of the cells through ENT2.

### 202 **AMPK is not involved in *Drosophila* HD pathogenesis**

203 AMP-activated protein kinase (AMPK) is one of the key enzymes maintaining energy  
204 balance within a cell by adjusting anabolic and catabolic pathways<sup>35</sup>; both Ado receptors  
205 and transporters have been implicated in its activation<sup>36-39</sup>. Activation of AMPK is

206 beneficial at early stages in mammalian HD models <sup>40</sup>; however, in the late stage of the  
207 disease it may worsen neuropathological and behavioral phenotypes <sup>41</sup>.

208 To find out whether the above-described effects of e-Ado signaling and transport on HD  
209 flies are mediated by AMPK, we co-expressed *Q93 mHTT* with three different recombinant  
210 forms of AMPK  $\alpha$  subunit<sup>42,43</sup>, including wild-type AMPK $\alpha$  [M], a phosphomimetic-  
211 activated form of AMPK $\alpha$  [T184D], and dominant negative AMPK [DN], and assessed the  
212 survival of HD flies. The results showed that neither the activation nor the inhibition of  
213 AMPK signaling influenced the eclosion rate (Fig. S7A) or lifespan (Fig. S7B).

214 To further confirm the genetic data related to AMPK activation or inhibition, we  
215 pharmaceutically inhibited AMPK signaling by feeding the larvae with AMPK inhibitor,  
216 dorsomorphin (Compound C) <sup>44</sup>. The results showed that although dorsomorphin had an  
217 effect on the development of larvae expressing normal Q20 HTT, it did not influence the  
218 eclosion of Q93-expressing larvae (Fig. S7C). Overall, our results show that, unlike in  
219 mammalian HD models, AMPK signaling does not play a significant role in the  
220 pathological manifestations of mHTT in *Drosophila*.

#### 221 **Identification of potential downstream targets of the AdoR/ENT2 pathway by** 222 **microarray analysis**

223 Our above results indicate that ENT2 and AdoR contribute to mHTT pathogenesis in HD  
224 *Drosophila* and work in the same pathway. To identify their downstream target genes, we  
225 compared the expression profiles of larvae carrying mutations in *adoR* or *ent2* as well as  
226 adult *adoR* mutants using microarrays (Affymetrix), shown as a Venn diagram in Fig. 5A  
227 and B. The intersection between each mutant contains differentially expressed transcripts  
228 in all three data sets, including six upregulated (Fig. 6A) and seven downregulated mRNAs  
229 (Fig. 5B). Interestingly, according to Flybase (<http://flybase.org>), four of these genes were  
230 expressed in the nervous system (*ptp99A* was upregulated, while *CG6184*, *cindr*, and  
231 *mod(mdg4)* were downregulated) (Fig. 5C).

232 To validate the microarray data, we knocked down *adoR* expression in the brain and  
233 examined the transcription of the four candidate genes expressed in the nervous system by  
234 qPCR. The results revealed that *ptp99A* and *mod(mdg4)* had the same expression trends as



235 observed in the microarrays (Fig. 5D). We further examined whether the expression of  
236 *ptp99A* and *mod(mdg4)* are influenced by an increase of e-Ado level. As shown in Fig. 6E,  
237 Ado microinjection significantly increased *mod(mdg4)* expression and decreased *ptp99A*  
238 expression, confirming that *mod(mdg4)* is positively regulated and *ptp99A* is negatively  
239 regulated by the AdoR/ENT2 pathway.

#### 240 **Suppression of *mod(mdg4)* decreased mHTT aggregation and increased survival of** 241 **HD flies**

242 In order to examine the potential roles of *ptp99A*, *CG6184*, *cindr*, and *mod(mdg4)* genes in  
243 HD pathogenesis, we used RNAi to silence them in HD flies. The results showed that only  
244 the RNAi silencing of *mod(mdg4)* extended their lifespan. As shown in Figure 6A, the  
245 survival curve of HD flies with a silenced *mod(mdg4)* gene was almost identical to the  
246 curve specific for *adoR* RNAi HD flies; this effect was stronger than in *ent2* RNAi HD  
247 flies. In addition, *mod(mdg4)* RNAi significantly decreased the formation of mHTT  
248 inclusions (Fig. 6B&C) and suppressed retinal pigment cell degeneration (Fig. 7D). In  
249 contrast to *mod(mdg4)*, RNAi silencing of the other three genes did not show any  
250 significant effect.

251 To further confirm that *mod(mdg4)* is downstream target of the AdoR pathway and  
252 regulated by e-Ado signaling, we first checked the expression of *mod(mdg4)* in larval  
253 brains and adult heads of HD flies using qPCR. In Q93 larvae, we found that both the  
254 expression level of *mod(mdg4)* (Fig. 7A) and the e-Ado level was lower than in Q20-  
255 expressing controls (Fig. 1A). For the 15-day-old (roughly corresponding to late-stage HD)  
256 Q93 adults, there was no difference in *mod(mdg4)* expression compared to Q20 control  
257 adults (Fig. 7A). We next examined the epistasis relationship between *ent2*, *adoR*, and  
258 *mod(mdg4)* by combining overexpression of *ent2* or *adoR* *mod(mdg4)* RNAi in Q93-  
259 expressing flies. The results showed that *mod(mdg4)* RNAi suppressed the lethal effects  
260 caused by the overexpression of *ent2* and *adoR* (Fig. 8B). These results indicate that  
261 *mod(mdg4)* serves as a downstream target of AdoR signaling involved in the process of  
262 mHTT inclusion formation and other pathogenic effects (Fig. 7C).

263 The *mod(mdg4)* locus of *Drosophila* contains several transcription units encoded on both  
264 DNA strands producing 31 splicing isoforms<sup>45</sup>. As shown in Fig. 5B, two of the

265 *mod(mdg4)*-specific microarray probes which target 11 *mod(mdg4)* splicing isoforms (Tab.  
266 S2) were downregulated in all three datasets. We performed splice form-specific qPCR  
267 analysis and found that *adoR* RNAi silencing leads to the downregulation of multiple  
268 *mod(mdg4)* isoforms (Fig. 7D), suggesting that AdoR signaling regulates multiple isoforms.

269

## 270 Discussion

271 Considerable dysregulation of Ado homeostasis has been observed in HD human  
272 patients and mice, but the mechanisms of such changes related to HD pathogenesis still  
273 need to be characterized<sup>46</sup>. The present study examined the e-Ado titer in the hemolymph  
274 of HD *Drosophila* larvae and found that it is lower in Q93-expressing larvae (Fig. 1).  
275 Although we did not measure the e-Ado titer in adult flies (due to a problem in acquiring a  
276 sufficient amount of hemolymph), the dynamic changes in expression levels of genes  
277 involved in Ado homeostasis (Fig. 1D-E), as well as the AdoR-regulated gene, *mod(mdg4)*  
278 (Fig. 8A), indicated that e-Ado titer and AdoR activity are variable in different stages of  
279 HD. Such dynamic changes of e-Ado homeostasis have also been observed in rodent HD  
280 models, whereby striatal adenosine tone is lower during the early stage of the disease and  
281 increased during the later stages<sup>13,47</sup>.

282 Both the activation and inhibition of A<sub>2A</sub>R by pharmacological treatments have  
283 shown benefits in mammalian HD models. In R6/2 mice, the beneficial effect of activating  
284 A<sub>2A</sub>R is thought to occur *via* the inhibition of AMPK nuclear translocation (which  
285 contributes to HD pathogenesis including brain atrophy, neuron death, and increased  
286 mHTT aggregates formation)<sup>41</sup>. Beneficial effects by antagonizing A<sub>2A</sub>R with SCH58261  
287 in R6/2 mice include reduced striatal glutamate and adenosine outflow as well as restoring  
288 emotional behavior and susceptibility to NMDA toxicity<sup>47,48</sup>. A<sub>1</sub>R activation has also been  
289 shown to have neuroprotective effects; however, the chronic administration of A<sub>1</sub>R  
290 agonists (leading to a desensitisation of A1 receptors) increases neuronal loss whereas the  
291 chronic administration of A<sub>1</sub>R antagonists (inducing an upregulation of A1 receptors)  
292 improves survival and neuronal preservation in the same model<sup>49</sup>. Our results show that  
293 the genetic depletion of AdoR has beneficial effects on HD flies, while the activation of  
294 AdoR contributes to mHTT pathogenesis and aggregates formation.

295 We observed a non-additive interaction between AdoR and ENT2 characteristic for  
296 epistasis relationship (Fig. 4B), indicating that ENT2 is required for the transportation of  
297 Ado from the intra- to extracellular environment which activates AdoR and, in turn,  
298 enhances the effects of mHTT. Our previous report showed that both ENT2 and AdoR  
299 participate in modulating synaptic transmission, and that both *adoR* and *ent2* mutations  
300 cause defects in associative learning in *Drosophila*<sup>25</sup>. Consistently, both the inhibition of  
301 Ado release by the knockdown of *ent2* in hemocytes and the mutation of *adoR* suppress  
302 metabolic reprogramming and hemocyte differentiation upon immune challenges<sup>23</sup>.  
303 Furthermore, another report showed that the disruption of epithelial integrity by Scribbled  
304 (*Scrib*) RNAi stimulates Ado release through ENT2, subsequently activating AdoR that, in  
305 turn, upregulates tumor necrosis factor (TNF) production which activates JNK signaling<sup>24</sup>.  
306 Interestingly, while the effects of *ent2* and *adoR* RNAi in HD flies were found to  
307 completely overlap, *ent1* RNAi showed a synergistic effect, suggesting potential AdoR-  
308 independent mechanisms (Fig. 4A). These results correspond to our previous report  
309 showing that *Drosophila* ENT1 has lower specificity for Ado transportation in comparison  
310 to ENT2<sup>50</sup>. The altered expression of *ent1*, as well as the RNAi effect in HD flies, might  
311 be associated with the disturbance of nucleotide homeostasis, similar to that observed in  
312 R6/2 and Hdh<sup>Q150</sup> mice<sup>51</sup>.

313 We identified a downstream target of the AdoR pathway, *mod(mdg4)*, which  
314 contributes to the effects of mHTT in the *Drosophila* HD model. The *mod(mdg4)* gene has  
315 previously been implicated in the regulation of position effect variegation, chromatin  
316 structure, and neurodevelopment<sup>52</sup>. The altered expression of *mod(mdg4)* has also been  
317 observed in flies expressing untranslated RNA containing CAG and CUG repeats<sup>53,54</sup>. In  
318 addition, *mod(mdg4)* has complex splicing, including *trans*-splicing, producing at least 31  
319 isoforms<sup>55</sup>. All isoforms contain a common N-terminal BTB/POZ domain which mediates  
320 the formation of homomeric, heteromeric, and oligomeric protein complexes<sup>56-58</sup>. Among  
321 these isoforms, only two [including *mod(mdg4)*-56.3 (isoform H) and *mod(mdg4)*-67.2  
322 (isoform T)] have been functionally characterized. *Mod(mdg4)*-56.3 is required during  
323 meiosis for maintaining the chromosome pairing and segregation in males<sup>59,60</sup>.  
324 *Mod(mdg4)*-67.2 interacts with Suppressor of hairy wing [Su(Hw)] and Centrosomal  
325 protein 190 kD (CP190) forming a chromatin insulator complex which inhibits the action

326 of the enhancer on the promoter, and is important for early embryo development and  
327 oogenesis<sup>61-63</sup>. Although our results showed that silencing all *mod(mdg4)* isoforms  
328 decreases the effects of mHTT (Fig. 6), we could not clarify which of the isoforms is  
329 specifically involved in HD pathogenesis because AdoR signaling regulates multiple  
330 isoforms (Fig. 7D). Interestingly, an earlier report on protein two-hybrid screening  
331 indicated that Mod(mdg4) interacts with six Hsp70 family proteins<sup>64,65</sup>, and Hsp70 proteins  
332 are known for their contribution to the suppression of polyQ aggregates formation and  
333 neurodegeneration<sup>66,67</sup>. Further study will be needed to identify the specific *mod(mdg4)*  
334 isoform involved in HD pathogenesis, and whether a decrease in mHTT aggregates by  
335 *mod(mdg4)* RNAi is connected to Hsp70 interaction.

336 In summary, we observed an alteration in the e-Ado concentration and expression of genes  
337 involved in Ado homeostasis in a *Drosophila* HD model. By candidate RNAi screening,  
338 we demonstrated that the silencing of *ent2* and *adoR* increases the survival of HD flies in  
339 addition to suppressing retinal cell degeneration and mHTT aggregate formation. We also  
340 showed that the activation of e-Ado signaling enhances the effects of mHTT. Furthermore,  
341 we found that *mod(mdg4)* is a downstream target of the AdoR pathway and plays a major  
342 role in the pathogenesis of HD flies. Our work enhances our understanding of e-Ado  
343 signaling in HD pathogenesis and may open up new opportunities for HD pharmacological  
344 intervention.

345

## 346 **Materials and methods**

### 347 **Fly stocks**

348 Flies were reared at 25 °C on standard cornmeal medium. The following RNAi lines were  
349 acquired from the TRiP collection (Transgenic RNAi project) at Harvard Medical School:  
350 *adgfA*-Ri (BL67233), *adgfC*-Ri (BL42915), *adgfD*-Ri (BL56980), *adenoK*-Ri (BL64491),  
351 *ent1*-Ri (BL51055), *adoR*-Ri (BL27536), *gfp*-Ri (BL41552), *mod(mdg4)*-Ri (BL32995),  
352 *cindr*-Ri (BL38976), and *ptp99A*-Ri (BL57299). The following RNAi lines were acquired  
353 from the Vienna *Drosophila* RNAi Center (VDRC): *ent2*-Ri (ID100464), *ent3*-Ri  
354 (ID47536), *cnt2*-Ri (ID37161), and *cg6184*-Ri (ID107150). The following lines were

355 provided by the Bloomington Drosophila Stock Center: UAS-AMPK $\alpha^{T184D}$  (BL32110),  
356 UAS-AMPK $\alpha^M$  (BL32108), UAS-AMPK $\alpha^{DN}$  (AMPK $\alpha^{K57A}$ , BL32112), and *elav*<sup>C155</sup>-  
357 GAL4 (BL458).

358 Flies overexpressing human normal huntingtin (HTT) exon 1, Q20Httexon<sup>1111FIL</sup> or mutant  
359 pathogenic fragments (mHTT), Q93Httexon<sup>14F132</sup> were obtained from Prof. Lawrence  
360 Marsh (UC Irvine, USA)<sup>17</sup>. The UAS-overexpression lines, Ox-adenoK and Ox-adoR (s),  
361 were obtained from Dr. Ingrid Poernbacher (The Francis Crick Institute, UK)<sup>24</sup>. *gmr*-GAL4  
362 was obtained from Dr. Marek Jindra (Biology Centre CAS, Czechia). *da*-GAL4 was  
363 obtained from Dr. Ulrich Theopold (Stockholm University). The UAS overexpression  
364 strains Ox-*adgfA*, Ox-*ent2*, and Ox-*adoR* (w), as well as *adoR*<sup>1</sup> and *ent2*<sup>3</sup> mutant flies, were  
365 generated in our previous studies<sup>25,68-70</sup>.

366

### 367 **Eclosion rate and adult lifespan assay**

368 For assessing the eclosion rate, male flies containing the desired RNAi or overexpression  
369 transgene (RiOx) in the second chromosome with genotype *w*<sup>1118</sup>/Y; RiOx /CyO; UAS-  
370 Q93/MKRS were crossed with females of *elav-GAL4*; +/+; +/+. The ratio of eclosed adults  
371 between *elav-GAL4*/+; RiOx/+; UAS-Q93/+ and *elav-GAL4*/+; RiOx/+; +/MKRS was then  
372 calculated. If the desired RiOx transgene was in the third chromosome, female flies  
373 containing *elav-GAL4*; +/+; RiOx were crossed with male *w*<sup>1118</sup>/Y; +/+; UAS-Q93/MKRS,  
374 and the ratio of eclosed adults between *elav-GAL4*; +/+; RiOx/UAS-Q93 and *elav-GAL4*;  
375 +/+; RiOx/MKRS was calculated.

376 For the adult lifespan assay, up to 30 newly emerged female adults were placed in each  
377 cornmeal vial and maintained at 25 °C. At least 200 flies of each genotype were tested, and  
378 the number of dead flies was counted every day. Flies co-expressing RiOx and Q20 were  
379 used for evaluating the effect of RNAi or overexpression of the desired transgenes (Fig.  
380 S3A&B).

381

### 382 **Extracellular adenosine and ATP level measurements**

383 To collect the hemolymph, six third instar larvae (96 hours post-oviposition) were torn in  
384 150  $\mu$ l of 1 $\times$  PBS containing thiourea (0.1 mg/ml) to prevent melanization. The samples

385 were then centrifuged at 5000× *g* for 5 min to separate the hemocytes and the supernatant  
386 was collected for measuring the extracellular adenosine or ATP level. For measuring the  
387 adenosine titer, 10 µl of hemolymph was mixed with reagents of an adenosine assay kit  
388 (Biovision) following the manufacturer's instructions. The fluorescent intensity was then  
389 quantified (Ex/Em = 533/ 587 nm) using a microplate reader (BioTek Synergy 4). For  
390 measuring the ATP level, 10 µl of hemolymph was incubated with 50 µl of CellTiter-Glo  
391 reagent (Promega) for 10 min. Then, the luminescent intensity was quantified using an  
392 Orion II microplate luminometer (Berthold). To calibrate the standard curve of ATP  
393 concentration, 25 µM ATP standard solution (Epicentre) was used for preparing a  
394 concentration gradient (0, 2, 4, 6, 8, 10 µM) of ATP solution and the luminescent intensity  
395 was measured for each concentration. The protein concentration of the hemolymph sample  
396 was determined by A280 absorbance using a NanoDrop 2000 spectrophotometer (Thermo  
397 Fisher). The adenosine and ATP concentrations were first normalized to protein  
398 concentration. Then, the values of Q20 and Q93 samples were normalized to values of the  
399 *GAL4* control sample. Six independent replicates for each genotype were performed for the  
400 analysis of adenosine and ATP levels.

#### 401 **RNA extraction**

402 The brains from 10 third-instar larvae (96 hours post-oviposition), heads from 30 female  
403 adults (5 days or 15 days old) or 15 whole female flies were collected. The samples were  
404 first homogenized in RiboZol (VWR) and the RNA phase was separated by chloroform.  
405 For brain or head samples, the RNA was precipitated by isopropanol, washed in 75%  
406 ethanol and dissolved in nuclease-free water. For whole fly samples, the RNA phase was  
407 purified using NucleoSpin RNA columns (Macherey-Nagel) following the manufacturer's  
408 instructions. All purified RNA samples were treated with DNase to prevent genomic DNA  
409 contamination. cDNA was synthesized from 2 µg of total RNA using a RevertAid H Minus  
410 First Strand cDNA Synthesis Kit (Thermo Fisher Scientific).

411

#### 412 **Adenosine injection**

413 Three- to five-day-old female adults were injected with 50 nl of 10 mM adenosine using a  
414 NANOJECT II (Drummond Scientific); control flies were injected with 50 nl of 1× PBS.  
415 Two hours post-injection, 15 injected flies for each replicate were collected for RNA  
416 extraction.

#### 417 **Microarray analysis**

418 The Affymetrix GeneChip® *Drosophila* genome 2.0 array system was used for microarray  
419 analysis following the standard protocol: 100 ng of RNA was amplified with a GeneChip  
420 3' express kit (Affymetrix), and 10 µg of labeled cRNA was hybridized to the chip  
421 according to the manufacturer's instructions. Statistical analysis of array data were  
422 described previously in our studies<sup>71,72</sup>. Storey's q value (false discovery rate, FDR) was  
423 used to select significantly differentially transcribed genes ( $q < 0.05$ ). Transcription data  
424 are shown in Table S2.

425

#### 426 **qPCR and primers**

427

428 5× HOT FIREPol® EvaGreen® qPCR Mix Plus with ROX (Solis Biodyne) and an Eco  
429 Real-Time PCR System (Illumina) were used for qPCR. Each reaction contained 4 µl of  
430 EvaGreen qPCR mix, 0.5 µl each of forward and reverse primers (10 µM), 5 µl of diluted  
431 cDNA and ddH<sub>2</sub>O to adjust the total volume to 20 µl. The list of primers is shown in Table  
432 S1. The expression level was calculated using the  $2^{-\Delta\Delta Ct}$  method. The ct values of target  
433 genes were normalized to reference gene, ribosomal protein 49 (*rp49*).

434

#### 435 **Imaging of retinal pigment cell degeneration**

436 Twenty- and thirty-day-old female adults were collected and their eye depigmentation  
437 phenotypes were recorded. At least 30 individuals for each genotype were examined under  
438 a microscope, and at least five representative individuals were chosen for imaging. Pictures  
439 were taken with an EOS 550D camera (Canon) mounted on a SteREO Discovery V8  
440 microscope (Zeiss).

#### 441 **Immunostaining**

442 Brains dissected from 10- or 20-day-old adult females were used for immunostaining. The  
443 brains were fixed in 4% PFA, permeabilized with PBST (0.1% Triton X-100), blocked in  
444 PAT (PBS, 0.1% Triton X-100, 1% BSA) and stained with antibodies in PBT (PBS, 0.3%  
445 Triton X-100, 0.1% BSA). Primary antibodies used in this study were mouse anti-HTT,  
446 MW8 which specifically binds to mHTT aggregates (1:40, DSHB), and rat anti-Elav (1:40,  
447 DSHB) which is a pan-neuronal antibody. Secondary antibodies were Alexa Fluor 488  
448 anti-mouse and Alexa Fluor 647 anti-rat (1:200, Invitrogen). The samples were mounted  
449 in Fluoromount-G (Thermo Fisher) overnight, prior to image examination.

450

#### 451 **Quantification of mHTT aggregates**

452 Images of aggregates were taken using a Flowview 100 confocal microscope (Olympus).  
453 The intensity of mHTT aggregates detected by anti-HTT antibody (MW8) or anti-Elav  
454 were quantified using ImageJ software. The level of mHTT aggregates was quantified by  
455 normalizing the mHTT aggregates intensity to Elav intensity. At least six brain images  
456 from each genotype were analyzed.

457

#### 458 **AMPK inhibitor (dorsomorphin) feeding**

459 Thirty first instar of Q20- or Q93-expressing larvae were collected for each replicate 24  
460 hours after egg laying. Larvae were transferred to fresh vials with 0.5 g instant *Drosophila*  
461 medium (Formula 4–24, Carolina Biological Supply, Burlington, NC) supplemented with  
462 2 mL distilled water containing either dorsomorphin (100  $\mu$ M) or DMSO (1%). Total  
463 number of emerging adults were counted.

464

#### 465 **Statistical analysis**

466 Error bars show standard error of the mean throughout this paper. Significance was  
467 established using Student's t-test (N.S., not significant; \*  $P < 0.05$ , \*\*  $P < 0.01$ , \*\*\*  $P <$   
468 0.001) or one-way ANOVA analysis with Tukey's HSD *post-hoc* test. For the statistical  
469 analysis of survival curves, we used the online tool OASIS 2 to perform a weighted log-  
470 rank test (Wilcoxon-Breslow-Gehan test) for determining significance<sup>73</sup>.

471

472



473 **Figures**

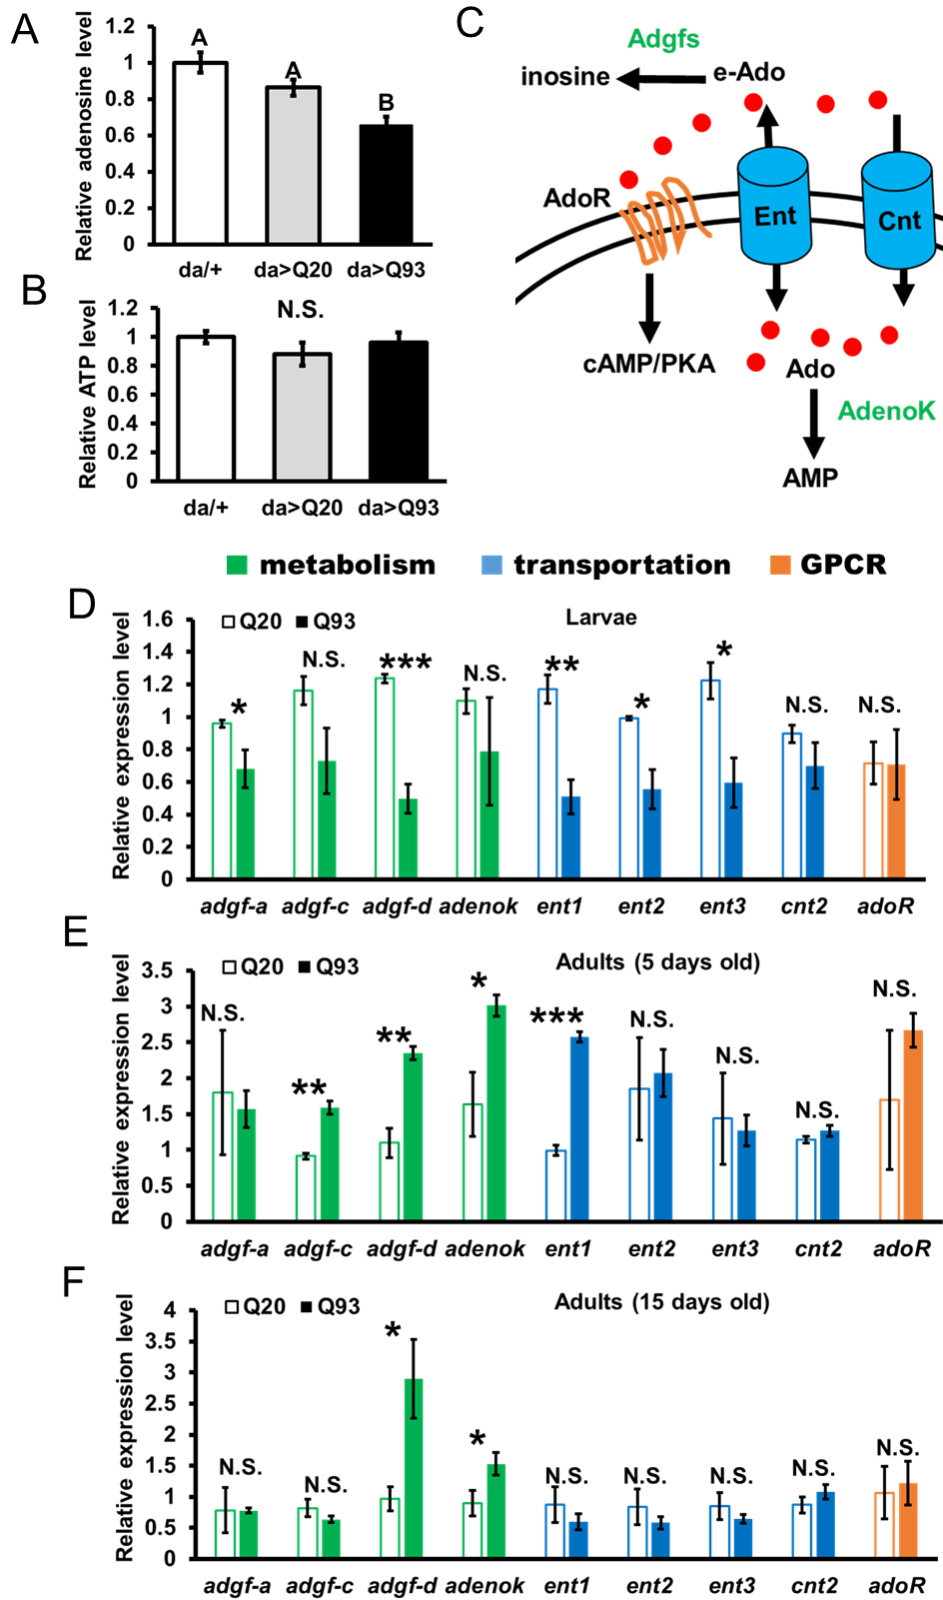

474

475 Figure 1. Alteration of adenosine homeostasis in the *Drosophila* HD model. (A-B) The  
476 measurements of extracellular adenosine levels (A) and extracellular ATP levels (B) in  
477 Q93-expressing (*da>Q93*), Q20-expressing (*da>Q20*) and control *da*-GAL4 (*da/+*) larvae.  
478 Six independent replicates were measured. Significance was analyzed by ANOVA with  
479 Tukey's HSD *post-hoc* test; significant differences ( $P < 0.05$ ) among treatment groups are  
480 marked with different letters. (C) Diagram showing the interaction of adenosine metabolic  
481 enzymes, transporters, and receptors in *Drosophila*. (D-F) Expression profiles of genes  
482 involved in adenosine metabolism (green) and adenosine transportation (blue) as well as  
483 adenosine receptors (orange) at different stages in HD *Drosophila* brains (larvae) or heads  
484 (adults). The expression of Q20 and Q93 were driven by the pan-neuronal driver (*elav*-  
485 GAL4). Three independent replicates were measured. The significances of results were  
486 examined using Student's t-test: \* $P < 0.05$ , \*\* $P < 0.01$ , \*\*\* $P < 0.001$ ; N.S., not significant.  
487 All data are presented as mean  $\pm$  SEM

488

489

490

491

492

493

494

495

496

497

498

499

500

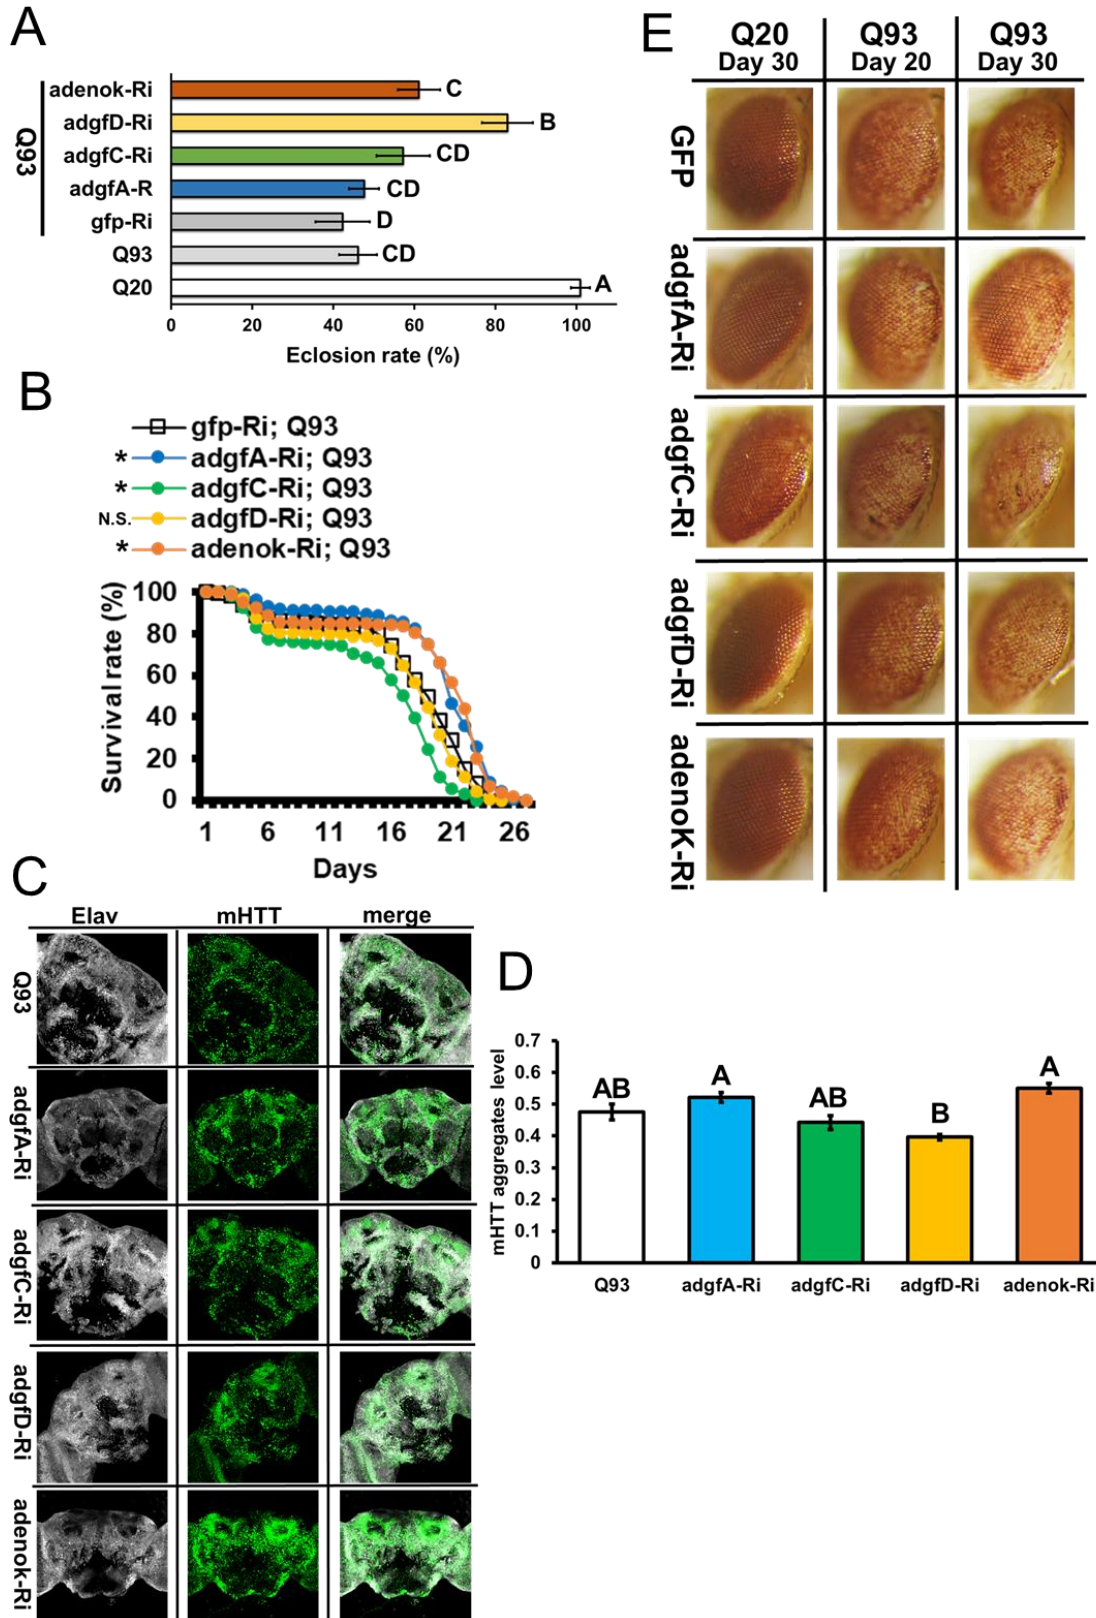

501

502

503 Figure 2. RNAi-mediated (Ri) downregulation of adenosine metabolic genes in HD  
504 *Drosophila*. Co-expression Q93 with each RNAi transgenes were driven by the pan-  
505 neuronal driver, *elav-GAL4* (A-D), or eye driver, *gmr-GAL4* (E). The adult eclosion rate  
506 (A), adult lifespan (B), mHTT aggregate levels (C-D), and retinal pigment cell  
507 degeneration (E) were compared. † Eye image of homozygous *adoR<sup>l</sup>* mutant without *htt*  
508 expression. At least five independent replicates were measured for eclosion rate. Detailed  
509 methodologies of the lifespan assay, eye imaging, and quantification of mHTT aggregates  
510 are described in Materials and methods. Significance values of the eclosion rate (A) and  
511 mHTT aggregates levels (D) were analyzed by ANOVA with Tukey's HSD *post-hoc* test;  
512 significant differences ( $P < 0.05$ ) among treatment groups are marked with different letters.  
513 Significance values for the adult lifespan curve (B) were analyzed by a weighted log-rank  
514 test, and significant differences between control gfp-Ri flies with each RNAi group are  
515 labeled as follows: \* $P < 0.05$ ; N.S., not significant. Error bars are presented as mean  $\pm$   
516 SEM

517

518

519

520

521

522

523

524

525

526

527

528

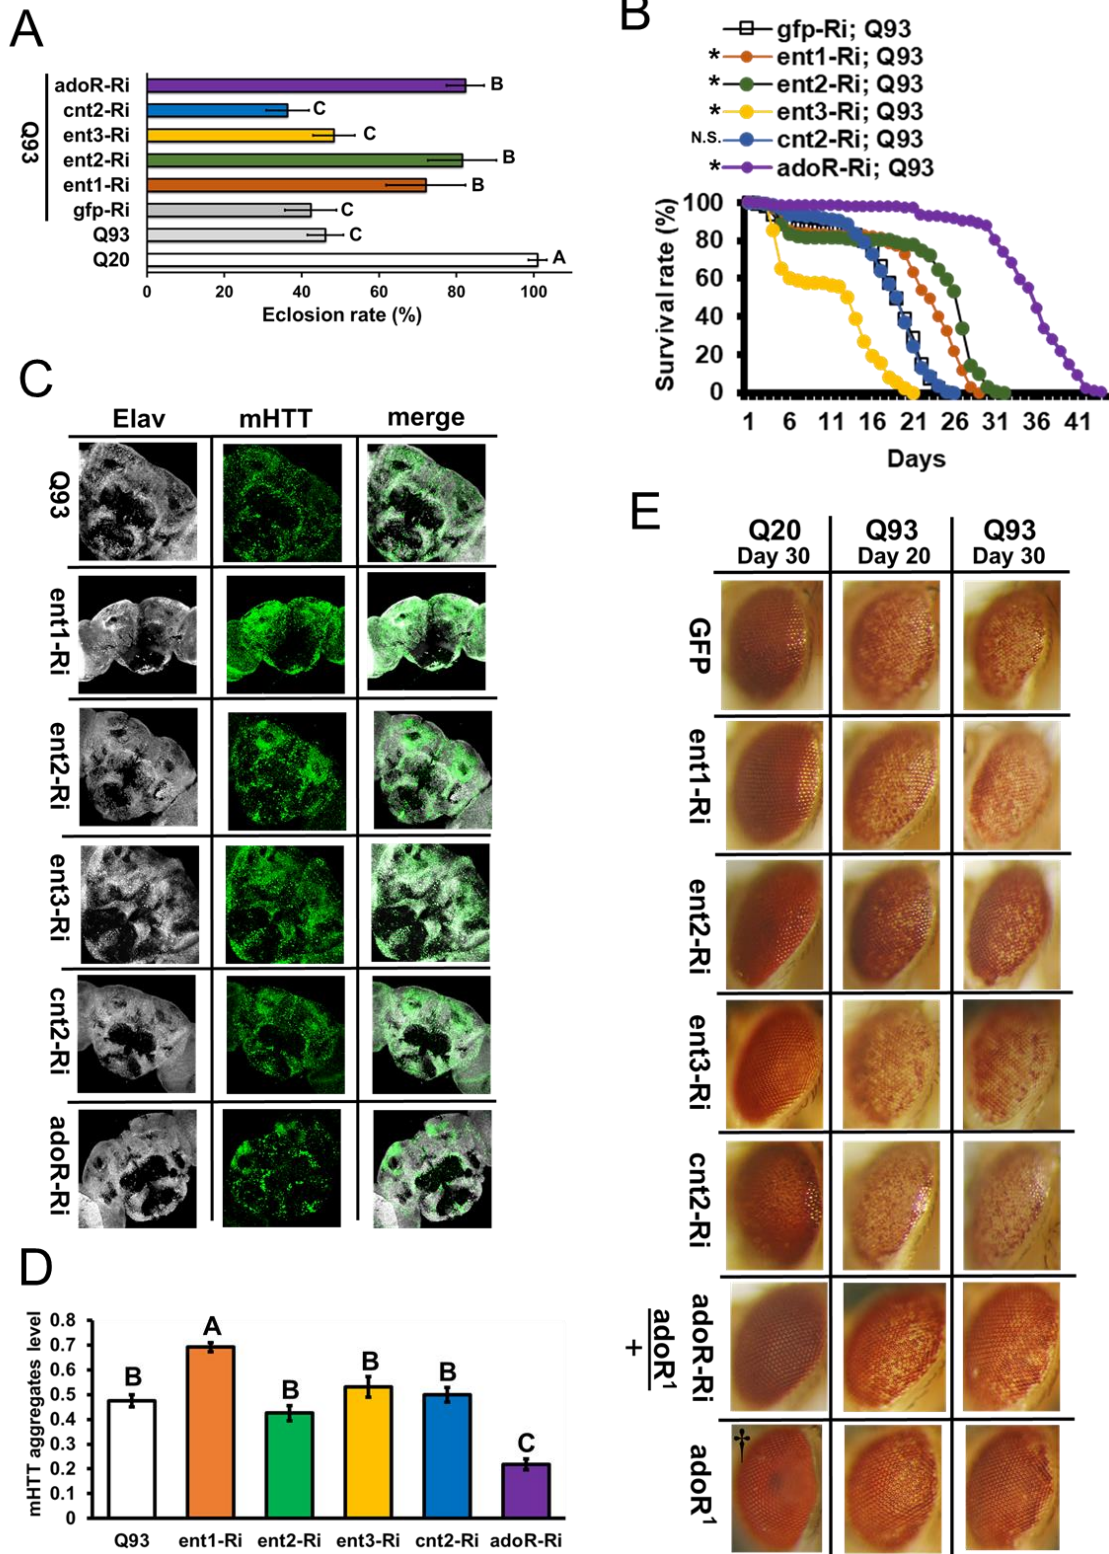

529

530

531 Figure 3. RNAi-mediated (Ri) downregulation of adenosine transporters and adenosine  
532 receptor (*adoR*) in HD *Drosophila*. Co-expression of Q93 with each RNAi transgene was  
533 driven by the pan-neuronal driver, *elav*-GAL4 (A-D), or eye driver, *gmr*-GAL4 (E). The  
534 adult eclosion rate (A), adult lifespan (B), mHTT aggregate levels (C-D), and retinal  
535 pigment cell degeneration (E) were compared. At least five independent replicates were  
536 measured for eclosion rate. Detailed methodologies of the lifespan assay, eye imaging, and  
537 quantification of mHTT aggregates are described in Materials and methods. Significance  
538 values for eclosion rate (A) and mHTT aggregates levels (D) were analyzed by ANOVA  
539 with Tukey's HSD *post-hoc* test; significant differences ( $P < 0.05$ ) among treatment groups  
540 are marked with different letters. Significance values for the adult lifespan curve (B) were  
541 analyzed by a weighted log-rank test; significant differences comparing control *gfp*-Ri with  
542 each RNAi group are labeled as follows: \* $P < 0.05$ ; N.S., not significant. Error bar are  
543 presented as mean  $\pm$  SEM

544

545

546

547

548

549

550

551

552

553

554

555

556

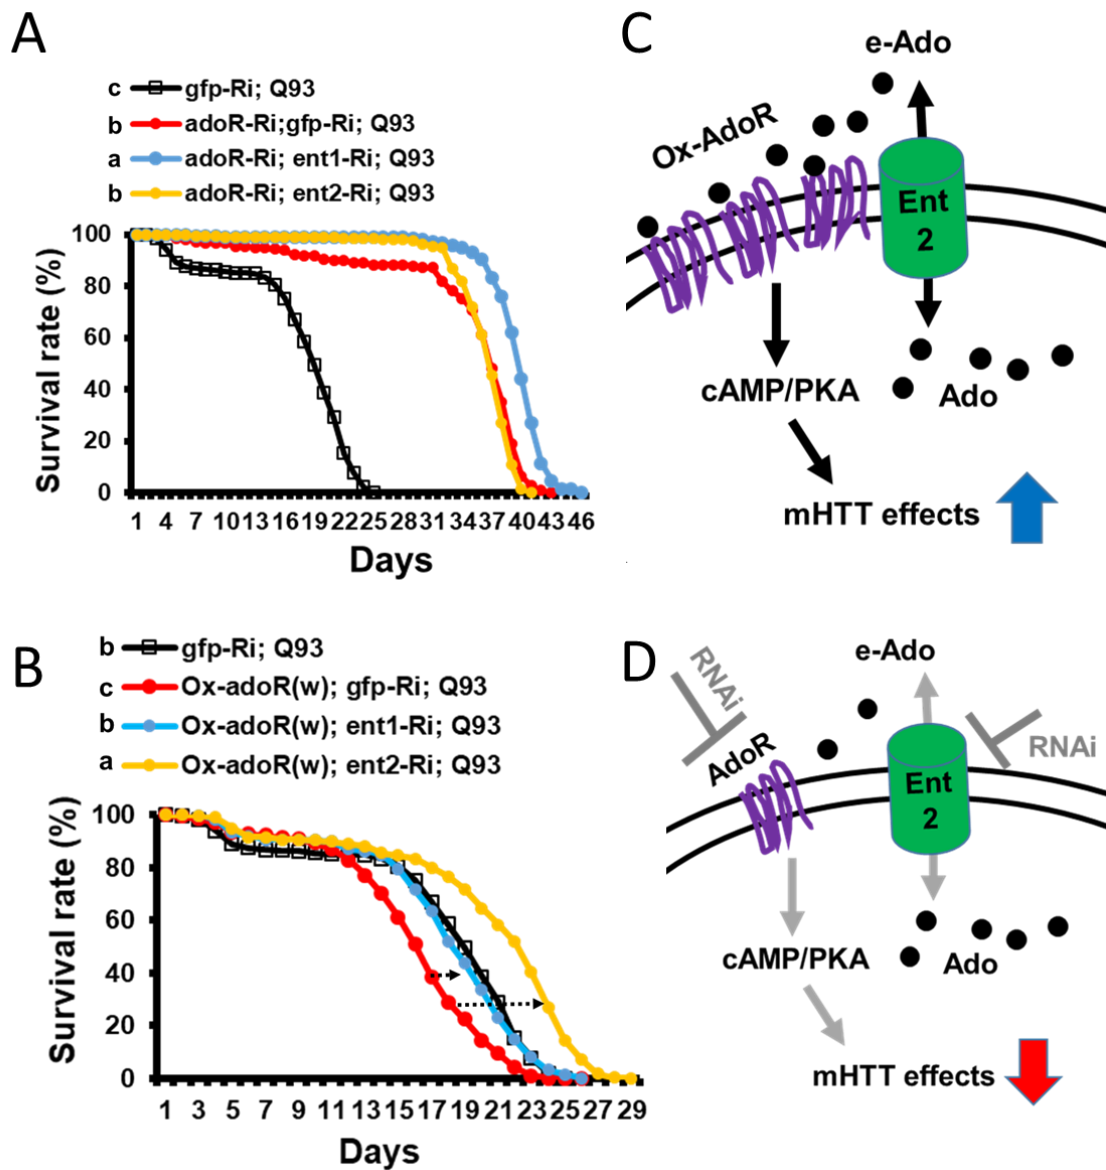

557

558 Figure 4. Interactions of AdoR and ENTs in HD *Drosophila*. (A) Co-expression of *adoR*  
559 RNAi with *ent1* or *ent2* RNAi in HD flies. (B) Co-expression of *adoR* overexpressing  
560 construct (Ox-*adoR*) with *ent1* or *ent2* RNAi transgenes in HD flies. Significance values  
561 of the adult lifespan curve were analyzed by a weighted log-rank test; different letters  
562 indicate significant differences ( $P < 0.05$ ) among treatment groups. (C-D) Diagrams  
563 showing the action of Ado in mHTT pathogenesis

564

565

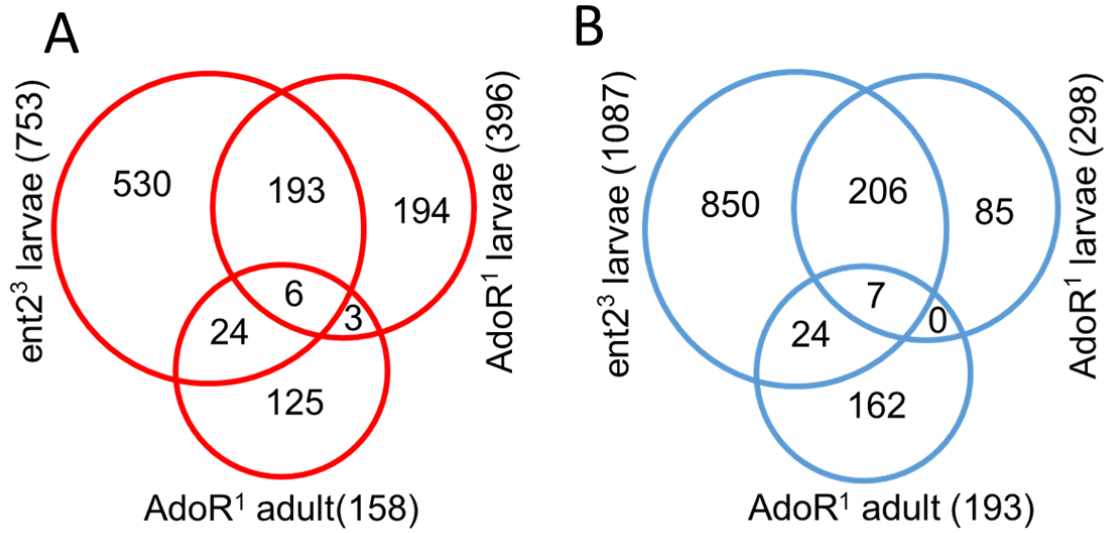

**C**

| Probe ID     | gene      | CG      | Log fold change      |                      |                      | Localization    |
|--------------|-----------|---------|----------------------|----------------------|----------------------|-----------------|
|              |           |         | Ent2 <sup>3</sup> -L | AdoR <sup>1</sup> -L | AdoR <sup>1</sup> -A |                 |
| 1641190_at   | Jon65Aii  | CG6580  | 2.79                 | 2.5                  | 3.18                 | MG              |
| 1627771_at   |           | CG13075 | 2.58                 | 2.91                 | 1.93                 | HG, MT          |
| 1630590_at   |           | CG18417 | 2.02                 | 3.48                 | 4.35                 | MG, HG          |
| 1624393_at   | w         | CG2759  | 1.77                 | 4.97                 | 4.5                  | MT              |
| 1632003_a_at | Ptp99A    | CG11516 | 1.53                 | 1.41                 | 2.32                 | ID, NS, T       |
| 1632404_at   | rtet      | CG5760  | 1.02                 | 0.85                 | 2.09                 | MG, HG, I       |
| 1633369_s_at |           | CG6184  | -0.23                | -0.21                | -0.68                | NS, tes         |
| 1637389_at   | lr100a    | CG11575 | -0.67                | -0.68                | -2.61                | non-spec        |
| 1635901_at   |           | CG17197 | -0.85                | -0.63                | -1.09                | ID, tes         |
| 1624020_at   | mod(mdg4) | CG32491 | -1                   | -1.4                 | -0.57                | NS, ID          |
| 1640850_at   | cindr     | CG31012 | -1.11                | -1.1                 | -1.02                | NS, SS, ID, tes |
| 1627953_at   | mod(mdg4) | CG32491 | -1.28                | -1.08                | -1.19                | NS, ID          |
| 1633748_at   | ND-20L    | CG2014  | -1.94                | -2.05                | -0.82                | ID, tes         |

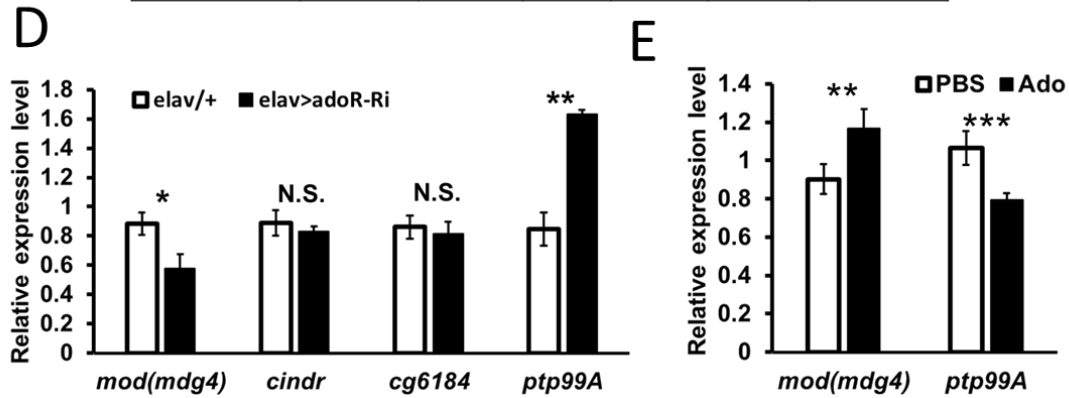

566



567 Figure 5. Identification of potential downstream targets of AdoR by microarray analysis.  
568 (A-B) Venn diagram showing the number of common genes (in intersect region) which are  
569 upregulated (A) or downregulated (B) among the *adoR* mutant larvae vs. control ( $w^{1118}$ ),  
570 *adoR* mutant adults vs. control ( $w^{1118}$ ), and *ent2* mutant larvae vs. control ( $w^{1118}$ ). The  
571 cutoff values for expression differences were set at  $Q < 0.05$  (false discovery rate, FDR).  
572 (C) The intersection between the three datasets; tissue localization of each gene expression  
573 was obtained from Flybase (<http://flybase.org/>). Tissue abbreviations: midgut (MG),  
574 hindgut (HG), Malpighian tubule (MT), imaginal disc (ID), integument (I), sensory system  
575 (SS), nervous system (NS), trachea (T), testis (tes), nonspecific expression (non-spec) (D)  
576 qPCR confirmed the potential AdoR-regulated genes expressed in the nervous system.  
577 Expression of *adoR* RNAi transgenes (*adoR*-Ri) was driven by the pan-neuronal driver  
578 (*elav*>*adoR*-Ri), and control flies contained *elav*-GAL4 (*elav*/+) only. (E) Enhancing  
579 extracellular adenosine signaling by adenosine injection and qPCR examination  
580 demonstrated that *mod(mdg4)* is positively- and *ptp99A* is negatively-regulated by  
581 adenosine signaling. Three independent replicates were measured in qPCR experiments.  
582 The qPCR primers of *mod(mdg4)* were selected to target the common 5' exon shared in all  
583 of the isoforms. Student's t-test was used to examine the significance of qPCR results: \* $P$   
584  $< 0.05$ , \*\* $P < 0.01$ , \*\*\* $P < 0.001$ ; N.S., not significant. Error bars are presented as averages  
585  $\pm$  SEM

586

587

588

589

590

591

592

593

594

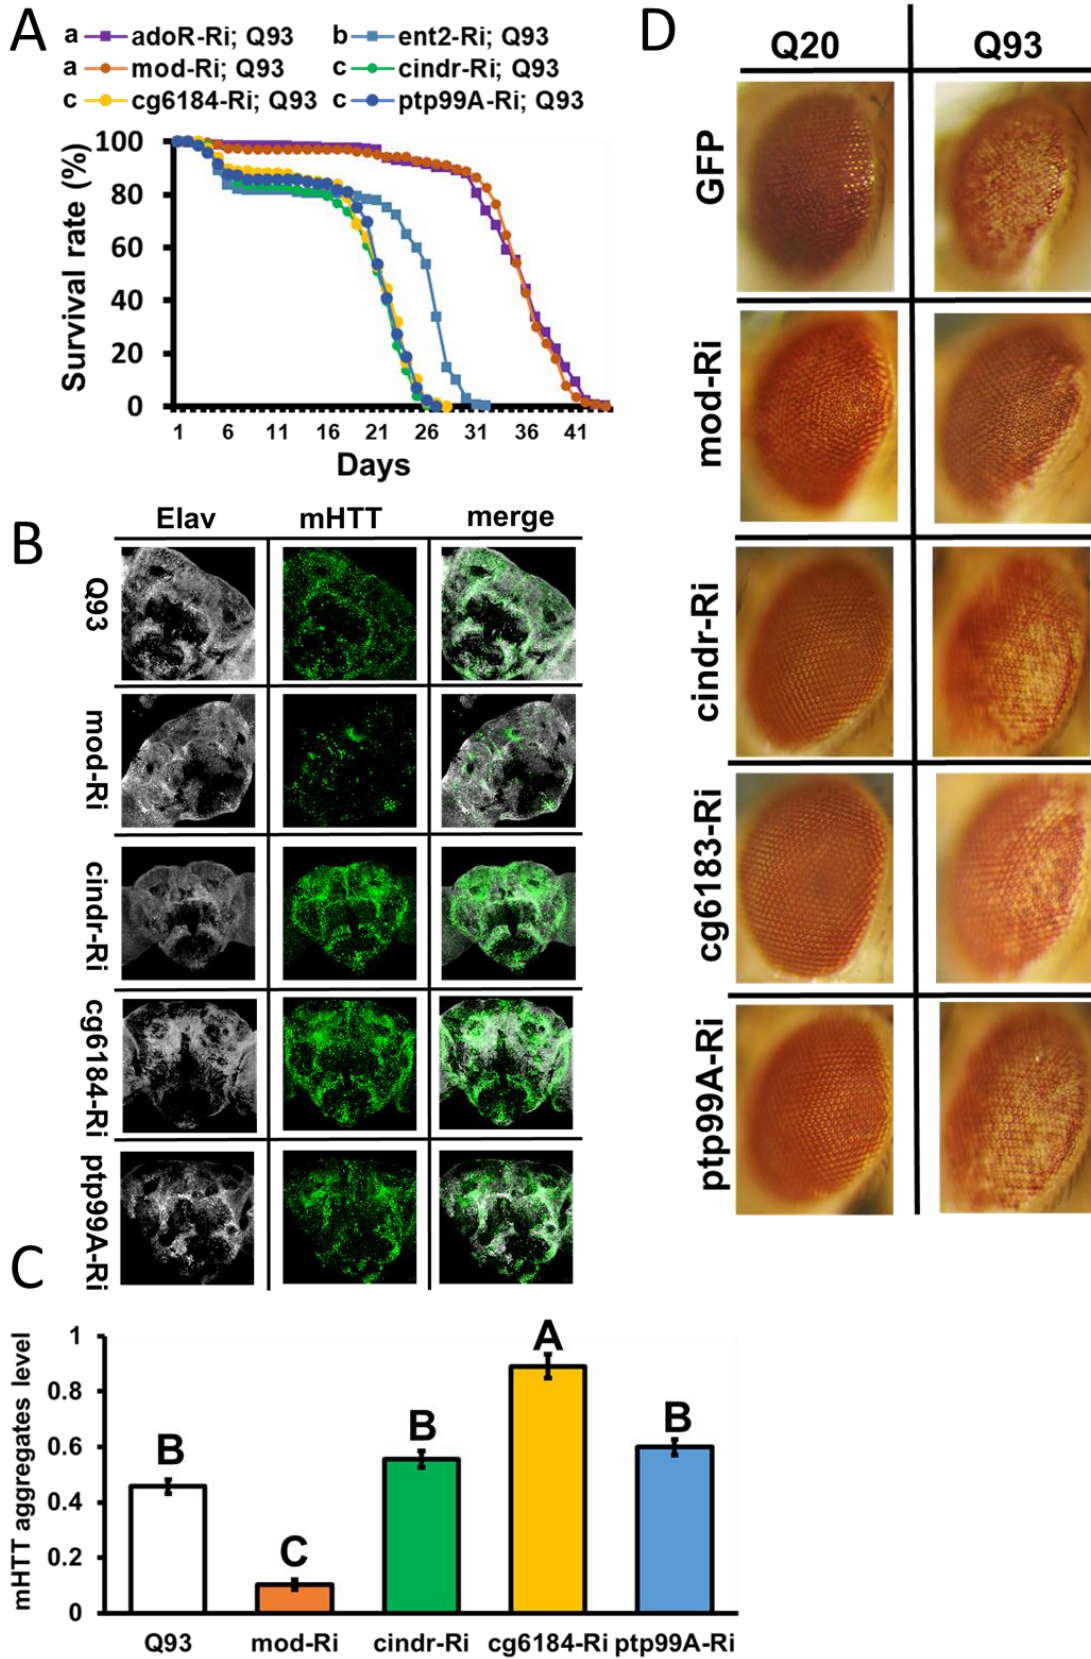

596 Figure 6. RNAi-mediated (Ri) downregulation of potential downstream targets of AdoR  
597 signaling in HD *Drosophila*. Co-expression of Q93 with each RNAi transgene, including  
598 *ptp99A*, *CG6184*, *cindr*, and *mod(mdg4)*, were driven by the pan-neuronal driver, *elav*-  
599 GAL4 (A-B), or the eye driver, *gmr*-GAL4 (D). The adult lifespan (A), mHTT aggregate  
600 levels (B-C), and retinal pigment cell degeneration (D) were compared. A detailed  
601 methodology of the lifespan assay, eye imaging, and quantification of mHTT aggregates  
602 are described in Materials and methods. Significance values of the adult lifespan curve (A)  
603 were analyzed by a weighted log-rank test, and different letters indicate significant  
604 differences ( $P < 0.05$ ) among treatment groups. Significance values of mHTT aggregate  
605 levels (C) were analyzed by ANOVA with Tukey's HSD *post-hoc* test; significant  
606 differences ( $P < 0.05$ ) among treatment groups are marked with different letters. Error bars  
607 are presented as mean  $\pm$  SEM

608

609

610

611

612

613

614

615

616

617

618

619

620

621

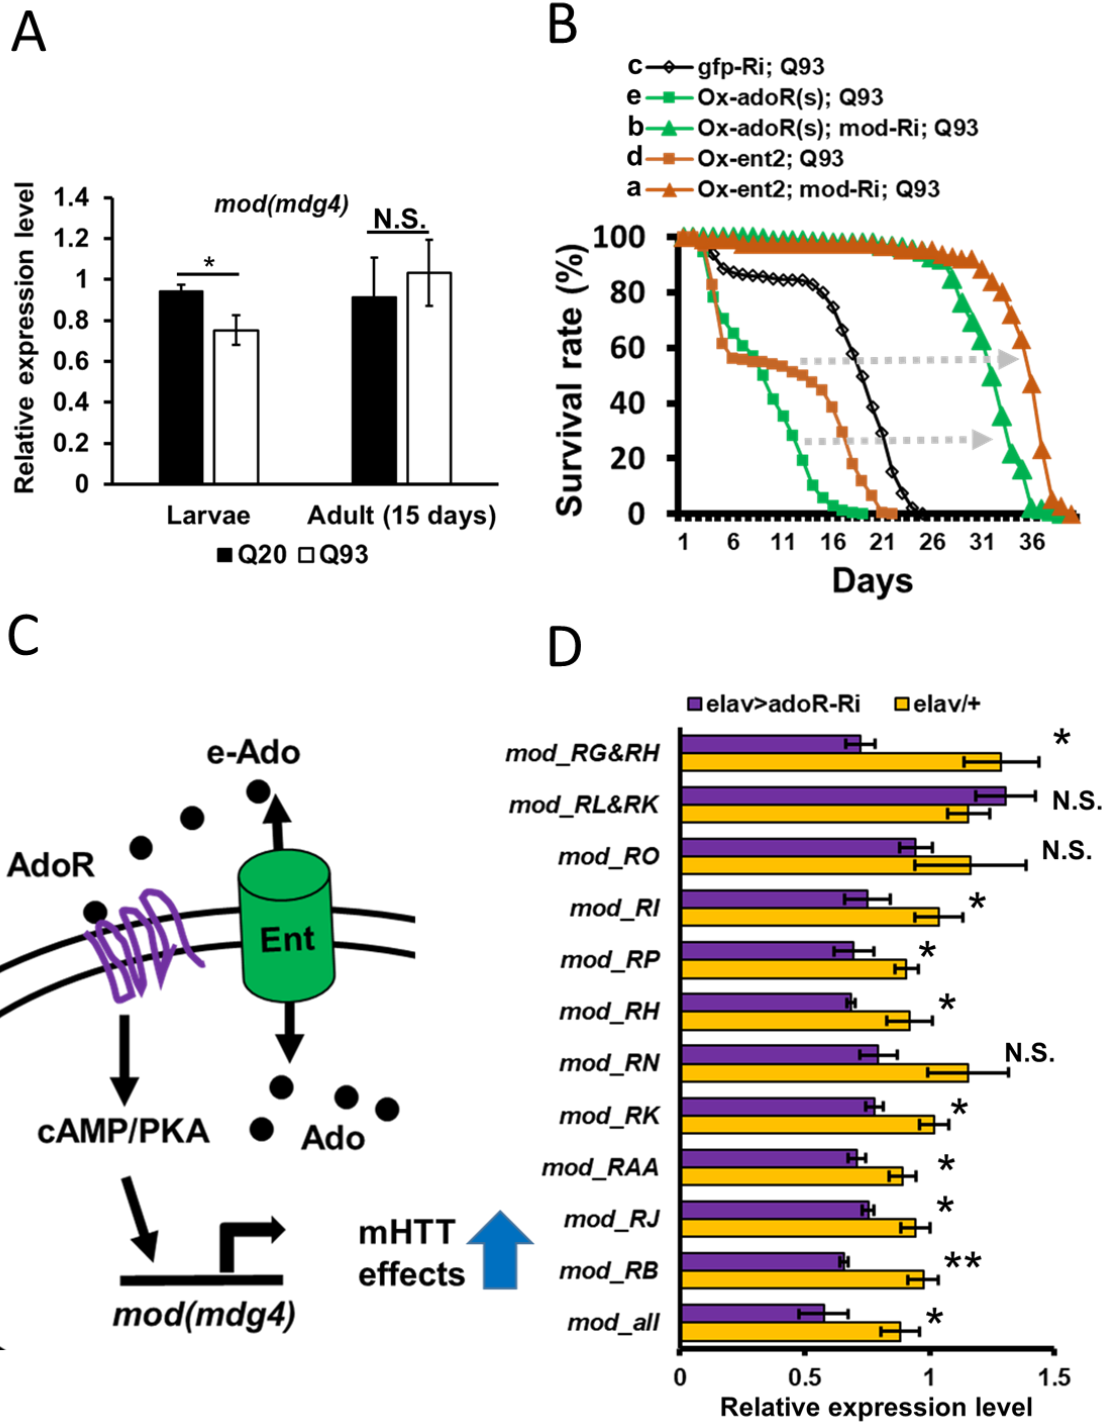

622

623

624

625 Figure 7. *mod(mdg4)* as a AdoR-regulated gene contributes to HD pathogenesis. (A) qPCR  
626 analysis of the expression of *mod(mdg4)* in the larval brain and 15-day-old adult heads of  
627 Q20- and Q93-expressing flies. The qPCR primers of *mod(mdg4)* targeted the common 5'  
628 exon shared by all isoforms. (B) Epistasis analysis showed that *ent2* (Ox-ent2) and *adoR*  
629 overexpression (Ox-adoR) with *mod(mdg4)* RNAi transgenes in HD flies decreased the  
630 mortality effect caused by *ent2* and *adoR* overexpression. This suggests that *mod(mdg4)* is  
631 downstream of the AdoR pathway (C). qPCR identified potential *mod(mdg4)* isoforms  
632 regulated by the AdoR pathway. *adoR* RNAi transgene (*adoR-Ri*) expression was driven  
633 by the pan-neuronal driver (*elav>adoR-Ri*); control flies contained only *elav-GAL4*  
634 (*elav/+*). Mod\_all indicates that the primers targeted all *mod(mdg4)* isoforms. Isoforms L  
635 and G do not have their own unique exonal region, therefore it is possible for the qPCR  
636 primers to target two isoforms simultaneously (presented as RG&RG and RL&RK). qPCR  
637 result significance was examined using Student's t-test: \* $P < 0.05$ , \*\* $P < 0.01$ , \*\*\* $P <$   
638  $0.001$ ; N.S., not significant. Significance values for the adult lifespan curve (A) were  
639 analyzed by weighted log-rank test, and different letters indicate significant differences ( $P$   
640  $< 0.05$ ) among treatment groups. Error bars are presented as mean  $\pm$  SEM

641

642

643

644

645

646

647

648

649

650

651

## 652 **Acknowledgements**

653 We thank Dr. Ingrid Poernbacher (The Francis Crick Institute, UK), Prof. Lawrence Marsh  
654 (UC Irvine, USA), Dr. Marek Jindra (Biology Centre CAS, Czechia), Dr. Tomas Dolezal  
655 (University of South Bohemia, Czechia), Dr. Ulrich Theopold (Stockholm University),  
656 Bloomington *Drosophila* Stock Center and Vienna *Drosophila* Resource Center for  
657 providing us with fly strains. This work was supported by the grant agency of the  
658 University of South Bohemia (065/2017/P to Y-HL), junior grant project GACR (19-  
659 13784Y to LK) and European Community's Programme Interreg Österreich-Tschechische  
660 Republik (REGGEN/ATCZ207 to MZ).

## 661 **Author Contributions**

662 Y-HL performed the experiments and prepared the manuscript. HM assisted in recording  
663 the adult lifespan and eye phenotypes as well as performed the brain dissection,  
664 immunochemistry and confocal microscopy imaging. LK performed the sample  
665 preparation and analyzed the microarray data. LR assisted in recording the adult lifespan,  
666 eye phenotype and prepared fly strains. TF established the methodologies for recording the  
667 eclosion rate, survival and prepared fly strains. MZ conceived the project and supervised  
668 manuscript preparation.

669

670

## 671 **References**

- 672 1 Dunwiddie, T. V. & Masino, S. A. The role and regulation of adenosine in the central  
673 nervous system. *Annu Rev Neurosci* **24**, 31-55, doi:10.1146/annurev.neuro.24.1.31  
674 (2001).
- 675 2 Cunha, R. A. Adenosine as a neuromodulator and as a homeostatic regulator in the  
676 nervous system: different roles, different sources and different receptors.  
677 *Neurochemistry International* **38**, 107-125, doi:10.1016/S0197-0186(00)00034-6  
678 (2001).
- 679 3 Fredholm, B. B. Adenosine, an endogenous distress signal, modulates tissue damage and  
680 repair. *Cell Death Differ* **14**, 1315-1323, doi:10.1038/sj.cdd.4402132 (2007).
- 681 4 Picano, E. & Abbracchio, M. P. Adenosine, the imperfect endogenous anti-ischemic  
682 cardio-neuroprotector. *Brain Res Bull* **52**, 75-82, doi:10.1016/s0361-9230(00)00249-5  
683 (2000).

- 684 5 Xiao, C., Liu, N., Jacobson, K. A., Gavriloova, O. & Reitman, M. L. Physiology and effects of  
685 nucleosides in mice lacking all four adenosine receptors. *PLoS Biol* **17**, e3000161,  
686 doi:10.1371/journal.pbio.3000161 (2019).
- 687 6 Cunha, R. A. Signaling by adenosine receptors-Homeostatic or allostatic control? *PLoS*  
688 *Biol* **17**, e3000213, doi:10.1371/journal.pbio.3000213 (2019).
- 689 7 Lee, C. F. & Chern, Y. J. Adenosine Receptors and Huntington's Disease. *Int Rev*  
690 *Neurobiol* **119**, 195-232, doi:10.1016/B978-0-12-801022-8.00010-6 (2014).
- 691 8 Vonsattel, J. P. & DiFiglia, M. Huntington disease. *J Neuropathol Exp Neurol* **57**, 369-384,  
692 doi:10.1097/00005072-199805000-00001 (1998).
- 693 9 Blum, D., Hourez, R., Galas, M.-C., Popoli, P. & Schiffmann, S. N. Adenosine receptors  
694 and Huntington's disease: implications for pathogenesis and therapeutics. *The Lancet*  
695 *Neurology* **2**, 366-374, doi:https://doi.org/10.1016/S1474-4422(03)00411-3 (2003).
- 696 10 Blum, D. *et al.* in *The Adenosine Receptors* (eds Pier Andrea Borea *et al.*) 281-308  
697 (Springer International Publishing, 2018).
- 698 11 Gomes, C. V., Kaster, M. P., Tome, A. R., Agostinho, P. M. & Cunha, R. A. Adenosine  
699 receptors and brain diseases: Neuroprotection and neurodegeneration. *Bba-*  
700 *Biomembranes* **1808**, 1380-1399, doi:10.1016/j.bbamem.2010.12.001 (2011).
- 701 12 Kao, Y. H. *et al.* Targeting ENT1 and adenosine tone for the treatment of Huntington's  
702 disease. *Hum Mol Genet* **26**, 467-478, doi:10.1093/hmg/ddw402 (2017).
- 703 13 Guitart, X. *et al.* Equilibrative nucleoside transporter ENT1 as a biomarker of Huntington  
704 disease. *Neurobiol Dis* **96**, 47-53, doi:10.1016/j.nbd.2016.08.013 (2016).
- 705 14 Tyebji, S. *et al.* Hyperactivation of D1 and A2A receptors contributes to cognitive  
706 dysfunction in Huntington's disease. *Neurobiol Dis* **74**, 41-57,  
707 doi:10.1016/j.nbd.2014.11.004 (2015).
- 708 15 Anderson, C. M. & Nedergaard, M. Emerging challenges of assigning P2X7 receptor  
709 function and immunoreactivity in neurons. *Trends Neurosci* **29**, 257-262,  
710 doi:10.1016/j.tins.2006.03.003 (2006).
- 711 16 Lewis, E. A. & Smith, G. A. Using *Drosophila* models of Huntington's disease as a  
712 translatable tool. *J Neurosci Methods* **265**, 89-98, doi:10.1016/j.jneumeth.2015.07.026  
713 (2016).
- 714 17 Steffan, J. S. *et al.* Histone deacetylase inhibitors arrest polyglutamine-dependent  
715 neurodegeneration in *Drosophila*. *Nature* **413**, 739-743, doi:Doi 10.1038/35099568  
716 (2001).
- 717 18 Kucerova, L. *et al.* Characterization of the *Drosophila* adenosine receptor: the effect of  
718 adenosine analogs on cAMP signaling in *Drosophila* cells and their utility for in vivo  
719 experiments. *J Neurochem* **121**, 383-395, doi:10.1111/j.1471-4159.2012.07701.x (2012).
- 720 19 Fountain, S. J. Primitive ATP-activated P2X receptors: discovery, function and  
721 pharmacology. *Front Cell Neurosci* **7**, 247, doi:10.3389/fncel.2013.00247 (2013).
- 722 20 Maier, S. A., Galellis, J. R. & McDermid, H. E. Phylogenetic analysis reveals a novel  
723 protein family closely related to adenosine deaminase. *J Mol Evol* **61**, 776-794,  
724 doi:10.1007/s00239-005-0046-y (2005).
- 725 21 Zurovec, M., Dolezal, T., Gazi, M., Pavlova, E. & Bryant, P. J. Adenosine deaminase-  
726 related growth factors stimulate cell proliferation in *Drosophila* by depleting  
727 extracellular adenosine. *Proc Natl Acad Sci U S A* **99**, 4403-4408,  
728 doi:10.1073/pnas.062059699 (2002).
- 729 22 Stenesen, D. *et al.* Adenosine nucleotide biosynthesis and AMPK regulate adult life span  
730 and mediate the longevity benefit of caloric restriction in flies. *Cell Metab* **17**, 101-112,  
731 doi:10.1016/j.cmet.2012.12.006 (2013).

- 732 23 Bajgar, A. *et al.* Extracellular adenosine mediates a systemic metabolic switch during  
733 immune response. *PLoS Biol* **13**, e1002135, doi:10.1371/journal.pbio.1002135 (2015).
- 734 24 Poernbacher, I. & Vincent, J. P. Epithelial cells release adenosine to promote local TNF  
735 production in response to polarity disruption. *Nat Commun* **9**, 4675,  
736 doi:10.1038/s41467-018-07114-z (2018).
- 737 25 Knight, D. *et al.* Equilibrative nucleoside transporter 2 regulates associative learning and  
738 synaptic function in *Drosophila*. *J Neurosci* **30**, 5047-5057,  
739 doi:10.1523/JNEUROSCI.6241-09.2010 (2010).
- 740 26 Song, W. *et al.* Morphometric analysis of Huntington's disease neurodegeneration in  
741 *Drosophila*. *Methods in molecular biology (Clifton, N.J.)* **1017**, 41-57, doi:10.1007/978-1-  
742 62703-438-8\_3 (2013).
- 743 27 Kao, Y. H. *et al.* Targeting ENT1 and adenosine tone for the treatment of Huntington's  
744 disease. *Human Molecular Genetics* **26**, 467-478, doi:10.1093/hmg/ddw402 (2017).
- 745 28 Martinez-Mir, M. I., Probst, A. & Palacios, J. M. Adenosine-A2 Receptors - Selective  
746 Localization in the Human Basal Ganglia and Alterations with Disease. *Neuroscience* **42**,  
747 697-706, doi:Doi 10.1016/0306-4522(91)90038-P (1991).
- 748 29 Glass, M., Dragunow, M. & Faull, R. L. M. The pattern of neurodegeneration in  
749 Huntington's disease: A comparative study of cannabinoid, dopamine, adenosine and  
750 GABA(A) receptor alterations in the human basal ganglia in Huntington's disease.  
751 *Neuroscience* **97**, 505-519, doi:Doi 10.1016/S0306-4522(00)00008-7 (2000).
- 752 30 Mievis, S., Blum, D. & Ledent, C. A2A receptor knockout worsens survival and motor  
753 behaviour in a transgenic mouse model of Huntington's disease. *Neurobiol Dis* **41**, 570-  
754 576, doi:10.1016/j.nbd.2010.09.021 (2011).
- 755 31 Bajgar, A. & Dolezal, T. Extracellular adenosine modulates host-pathogen interactions  
756 through regulation of systemic metabolism during immune response in *Drosophila*. *PLoS*  
757 *Pathog* **14**, e1007022, doi:10.1371/journal.ppat.1007022 (2018).
- 758 32 Zuberova, M., Fenckova, M., Simek, P., Janeckova, L. & Dolezal, T. Increased extracellular  
759 adenosine in *Drosophila* that are deficient in adenosine deaminase activates a release of  
760 energy stores leading to wasting and death. *Dis Model Mech* **3**, 773-784,  
761 doi:10.1242/dmm.005389 (2010).
- 762 33 Kuo, Y., Ren, S., Lao, U., Edgar, B. A. & Wang, T. Suppression of polyglutamine protein  
763 toxicity by co-expression of a heat-shock protein 40 and a heat-shock protein 110. *Cell*  
764 *Death Dis* **4**, e833, doi:10.1038/cddis.2013.351 (2013).
- 765 34 Mugat, B., Parmentier, M. L., Bonneaud, N., Chan, H. Y. & Maschat, F. Protective role of  
766 Engrailed in a *Drosophila* model of Huntington's disease. *Hum Mol Genet* **17**, 3601-3616,  
767 doi:10.1093/hmg/ddn255 (2008).
- 768 35 Aymerich, I., Fougelle, F., Ferre, P., Casado, F. J. & Pastor-Anglada, M. Extracellular  
769 adenosine activates AMP-dependent protein kinase (AMPK). *J Cell Sci* **119**, 1612-1621,  
770 doi:10.1242/jcs.02865 (2006).
- 771 36 Dolinar, K., Jan, V., Pavlin, M., Chibalin, A. V. & Pirkmajer, S. Nucleosides block AICAR-  
772 stimulated activation of AMPK in skeletal muscle and cancer cells. *Am J Physiol Cell*  
773 *Physiol* **315**, C803-C817, doi:10.1152/ajpcell.00311.2017 (2018).
- 774 37 Medina-Pulido, L. *et al.* Hypoxia and P1 receptor activation regulate the high-affinity  
775 concentrative adenosine transporter CNT2 in differentiated neuronal PC12 cells.  
776 *Biochem J* **454**, 437-445, doi:10.1042/BJ20130231 (2013).
- 777 38 Liu, H. *et al.* Elevated ecto-5'-nucleotidase: a missing pathogenic factor and new  
778 therapeutic target for sickle cell disease. *Blood Adv* **2**, 1957-1968,  
779 doi:10.1182/bloodadvances.2018015784 (2018).



- 780 39 Ruan, C. C. *et al.* A(2A) Receptor Activation Attenuates Hypertensive Cardiac  
781 Remodeling via Promoting Brown Adipose Tissue-Derived FGF21. *Cell Metabolism* **28**,  
782 476+, doi:10.1016/j.cmet.2018.06.013 (2018).
- 783 40 Vazquez-Manrique, R. P. *et al.* AMPK activation protects from neuronal dysfunction and  
784 vulnerability across nematode, cellular and mouse models of Huntington's disease. *Hum*  
785 *Mol Genet* **25**, 1043-1058, doi:10.1093/hmg/ddv513 (2016).
- 786 41 Ju, T. C. *et al.* Nuclear translocation of AMPK-alpha1 potentiates striatal  
787 neurodegeneration in Huntington's disease. *J Cell Biol* **194**, 209-227,  
788 doi:10.1083/jcb.201105010 (2011).
- 789 42 Swick, L. L., Kazgan, N., Onyenwoke, R. U. & Brenman, J. E. Isolation of AMP-activated  
790 protein kinase (AMPK) alleles required for neuronal maintenance in *Drosophila*  
791 *melanogaster*. *Biol Open* **2**, 1321-1323, doi:10.1242/bio.20136775 (2013).
- 792 43 Johnson, E. C. *et al.* Altered metabolism and persistent starvation behaviors caused by  
793 reduced AMPK function in *Drosophila*. *PLoS One* **5**, doi:10.1371/journal.pone.0012799  
794 (2010).
- 795 44 Braco, J. T., Gillespie, E. L., Alberto, G. E., Brenman, J. E. & Johnson, E. C. Energy-  
796 dependent modulation of glucagon-like signaling in *Drosophila* via the AMP-activated  
797 protein kinase. *Genetics* **192**, 457-466, doi:10.1534/genetics.112.143610 (2012).
- 798 45 Yu, S., Waldholm, J., Bohm, S. & Visa, N. Brahma regulates a specific trans-splicing event  
799 at the mod(mdg4) locus of *Drosophila melanogaster*. *RNA Biol* **11**, 134-145,  
800 doi:10.4161/rna.27866 (2014).
- 801 46 Blum, D. *et al.* The Role of Adenosine Tone and Adenosine Receptors in Huntington's  
802 Disease. *J Caffeine Adenosine Res* **8**, 43-58, doi:10.1089/caff.2018.0006 (2018).
- 803 47 Gianfriddo, M., Melani, A., Turchi, D., Giovannini, M. G. & Pedata, F. Adenosine and  
804 glutamate extracellular concentrations and mitogen-activated protein kinases in the  
805 striatum of Huntington transgenic mice. Selective antagonism of adenosine A2A  
806 receptors reduces transmitter outflow. *Neurobiol Dis* **17**, 77-88,  
807 doi:10.1016/j.nbd.2004.05.008 (2004).
- 808 48 Domenici, M. R. *et al.* Behavioral and electrophysiological effects of the adenosine A2A  
809 receptor antagonist SCH 58261 in R6/2 Huntington's disease mice. *Neurobiol Dis* **28**,  
810 197-205, doi:10.1016/j.nbd.2007.07.009 (2007).
- 811 49 Blum, D., Hourez, R., Galas, M. C., Popoli, P. & Schiffmann, S. N. Adenosine receptors  
812 and Huntington's disease: implications for pathogenesis and therapeutics. *Lancet Neurol*  
813 **2**, 366-374, doi:10.1016/s1474-4422(03)00411-3 (2003).
- 814 50 Fleischmannova, J. *et al.* Differential response of *Drosophila* cell lines to extracellular  
815 adenosine. *Insect Biochem Mol Biol* **42**, 321-331, doi:10.1016/j.ibmb.2012.01.002  
816 (2012).
- 817 51 Toczek, M. *et al.* An impaired metabolism of nucleotides underpins a novel mechanism  
818 of cardiac remodeling leading to Huntington's disease related cardiomyopathy. *Biochim*  
819 *Biophys Acta* **1862**, 2147-2157, doi:10.1016/j.bbadis.2016.08.019 (2016).
- 820 52 Dorn, R. & Krauss, V. The modifier of mdg4 locus in *Drosophila*: functional complexity is  
821 resolved by trans splicing. *Genetica* **117**, 165-177, doi:Doi 10.1023/A:1022983810016  
822 (2003).
- 823 53 Mutsuddi, M., Marshall, C. M., Benzow, K. A., Koob, M. D. & Rebay, I. The  
824 spinocerebellar ataxia 8 noncoding RNA causes neurodegeneration and associates with  
825 staufer in *Drosophila*. *Curr Biol* **14**, 302-308, doi:10.1016/j.cub.2004.01.034 (2004).

- 826 54 van Eyk, C. L. *et al.* Perturbation of the Akt/Gsk3-beta signalling pathway is common to  
827 Drosophila expressing expanded untranslated CAG, CUG and AUUCU repeat RNAs. *Hum*  
828 *Mol Genet* **20**, 2783-2794, doi:10.1093/hmg/ddr177 (2011).
- 829 55 Krauss, V. & Dorn, R. Evolution of the trans-splicing Drosophila locus mod(mdg4) in  
830 several species of Diptera and Lepidoptera. *Gene* **331**, 165-176,  
831 doi:10.1016/j.gene.2004.02.019 (2004).
- 832 56 Bardwell, V. J. & Treisman, R. The POZ domain: a conserved protein-protein interaction  
833 motif. *Genes Dev* **8**, 1664-1677, doi:10.1101/gad.8.14.1664 (1994).
- 834 57 Espinas, M. L. *et al.* The N-terminal POZ domain of GAGA mediates the formation of  
835 oligomers that bind DNA with high affinity and specificity. *J Biol Chem* **274**, 16461-  
836 16469, doi:10.1074/jbc.274.23.16461 (1999).
- 837 58 Albagli, O., Dhordain, P., Deweindt, C., Lecocq, G. & Leprince, D. The BTB/POZ domain: a  
838 new protein-protein interaction motif common to DNA- and actin-binding proteins. *Cell*  
839 *Growth Differ* **6**, 1193-1198 (1995).
- 840 59 Thomas, S. E. *et al.* Identification of two proteins required for conjunction and regular  
841 segregation of achiasmata homologs in Drosophila male meiosis. *Cell* **123**, 555-568,  
842 doi:10.1016/j.cell.2005.08.043 (2005).
- 843 60 Soltani-Bejnood, M. *et al.* Role of the mod(mdg4) common region in homolog  
844 segregation in Drosophila male meiosis. *Genetics* **176**, 161-180,  
845 doi:10.1534/genetics.106.063289 (2007).
- 846 61 Buchner, K. *et al.* Genetic and molecular complexity of the position effect variegation  
847 modifier mod(mdg4) in Drosophila. *Genetics* **155**, 141-157 (2000).
- 848 62 Soshnev, A. A., Baxley, R. M., Manak, J. R., Tan, K. & Geyer, P. K. The insulator protein  
849 Suppressor of Hairy-wing is an essential transcriptional repressor in the Drosophila  
850 ovary. *Development* **140**, 3613-3623, doi:10.1242/dev.094953 (2013).
- 851 63 Melnikova, L., Kostyuchenko, M., Parshikov, A., Georgiev, P. & Golovnin, A. Role of  
852 Su(Hw) zinc finger 10 and interaction with CP190 and Mod(mdg4) proteins in recruiting  
853 the Su(Hw) complex to chromatin sites in Drosophila. *PLoS One* **13**, e0193497,  
854 doi:10.1371/journal.pone.0193497 (2018).
- 855 64 Giot, L. *et al.* A protein interaction map of Drosophila melanogaster. *Science* **302**, 1727-  
856 1736, doi:10.1126/science.1090289 (2003).
- 857 65 Oughtred, R. *et al.* The BioGRID interaction database: 2019 update. *Nucleic Acids Res* **47**,  
858 D529-D541, doi:10.1093/nar/gky1079 (2019).
- 859 66 Warrick, J. M. *et al.* Suppression of polyglutamine-mediated neurodegeneration in  
860 Drosophila by the molecular chaperone HSP70. *Nat Genet* **23**, 425-428,  
861 doi:10.1038/70532 (1999).
- 862 67 Chan, H. Y., Warrick, J. M., Gray-Board, G. L., Paulson, H. L. & Bonini, N. M. Mechanisms  
863 of chaperone suppression of polyglutamine disease: selectivity, synergy and modulation  
864 of protein solubility in Drosophila. *Hum Mol Genet* **9**, 2811-2820,  
865 doi:10.1093/hmg/9.19.2811 (2000).
- 866 68 Dolezal, T., Dolezelova, E., Zurovec, M. & Bryant, P. J. A role for adenosine deaminase in  
867 Drosophila larval development. *PLoS Biol* **3**, e201, doi:10.1371/journal.pbio.0030201  
868 (2005).
- 869 69 Dolezelova, E., Nothacker, H. P., Civelli, O., Bryant, P. J. & Zurovec, M. A Drosophila  
870 adenosine receptor activates cAMP and calcium signaling. *Insect Biochem Mol Biol* **37**,  
871 318-329, doi:10.1016/j.ibmb.2006.12.003 (2007).

872 70 Dolezal, T., Gazi, M., Zurovec, M. & Bryant, P. J. Genetic analysis of the ADGF multigene  
873 family by homologous recombination and gene conversion in *Drosophila*. *Genetics* **165**,  
874 653-666 (2003).

875 71 Arefin, B. *et al.* Genome-wide transcriptional analysis of *Drosophila* larvae infected by  
876 entomopathogenic nematodes shows involvement of complement, recognition and  
877 extracellular matrix proteins. *J Innate Immun* **6**, 192-204, doi:10.1159/000353734  
878 (2014).

879 72 Kucerova, L. *et al.* The *Drosophila* Chitinase-Like Protein IDGF3 Is Involved in Protection  
880 against Nematodes and in Wound Healing. *J Innate Immun* **8**, 199-210,  
881 doi:10.1159/000442351 (2016).

882 73 Han, S. K. *et al.* OASIS 2: online application for survival analysis 2 with features for the  
883 analysis of maximal lifespan and healthspan in aging research. *Oncotarget* **7**, 56147-  
884 56152, doi:10.18632/oncotarget.11269 (2016).

885
